# Supplementary material for: Evaluating the mineral commodity supply risk of the U.S. manufacturing sector
Source: PubMed Central journal article supplement — Sci Adv. 2020 Feb 21;6(8):eaay8647. doi: 10.1126/sciadv.aay8647 (PMC7035000; doi:10.1126/sciadv.aay8647), 2020-02-21
Supplement: aay8647_SM.pdf [file aay8647_SM.pdf]

## Supplementary Materials for

### Evaluating the mineral commodity supply risk of the U.S. manufacturing sector

Nedal T. Nassar\*, Jamie Brainard, Andrew Gulley, Ross Manley, Grecia Matos, Graham Lederer, Laurence R. Bird, David Pineault, Elisa Alonso, Joseph Gambogi, Steven M. Fortier

\*Corresponding author. Email: [nnassar@usgs.gov](mailto:nnassar@usgs.gov)

Published 21 February 2020, *Sci. Adv.* **6**, eaay8647 (2020)  
DOI: 10.1126/sciadv.aay8647

#### This PDF file includes:

Supplementary Materials and Methods

Fig. S1. WSI and constituent components by year.

Fig. S2. SR, EV, and TE scores for years 2007–2015.

Fig. S3. Hierarchical cluster analysis based on 2016 DP, EV, and TE scores.

Fig. S4. Hierarchical cluster analysis based on 2007–2016 average SR scores.

Table S1. Description of data for world primary and secondary production and prices for each commodity.

Table S2. Description of data for U.S. apparent consumption calculation by component for each commodity.

Table S3. Estimated elemental content of various steel alloys.

Table S4. Description of applications, associated NAICS codes, and U.S. demand fractions for each commodity.

Table S5. Rare earth oxide distribution (in percent of total) for various world regions.

Table S6. Rare earth oxide distribution (in percent of total) for various regions in China.

## Supplementary Materials and Methods

### World primary and secondary production and commodity prices

In table S1, descriptions and data sources utilized for world primary and secondary production and prices are provided for each commodity. In most cases, the U.S. Geological Survey's Minerals Yearbooks are utilized as the data source for world production. Because the Minerals Yearbooks include production data over a 5-year interval and because the data are often revised in subsequent editions, the latest Minerals Yearbook reporting data for the pertinent year is utilized in this analysis. For example, data for year 2011 are obtained from the 2015 Minerals Yearbook (the latest yearbook to contain data for year 2011), while data for year 2010 are obtained from the 2014 Minerals Yearbook. Similarly, data for years 2009, 2008, and 2007 are obtained from the 2013, 2012, and 2011 Minerals Yearbooks, respectively. Data for years 2012-2016 are obtained from the 2016 Minerals Yearbook, the latest complete edition as of this writing.

**Table S1. Description of data for world primary and secondary production and prices for each commodity (listed alphabetically).**

| Commodity | World primary production            |                                                                                                  |            | World secondary production                                    |                                                               |                | Prices                                                                                                         |            |
|-----------|-------------------------------------|--------------------------------------------------------------------------------------------------|------------|---------------------------------------------------------------|---------------------------------------------------------------|----------------|----------------------------------------------------------------------------------------------------------------|------------|
|           | Description                         | Assumed content                                                                                  | References | Description                                                   | Assumed content                                               | Reference      | Description                                                                                                    | References |
| Alumina   | Primary alumina refinery production | Quantities are converted to aluminum content based on the standard stoichiometric ratio (~52.9%) | (41–46)    | Not applicable                                                | Not applicable                                                | Not applicable | Annual average unit value of U.S. imported alumina, metallurgical grade. Includes cost, insurance and freight. | (41–46)    |
| Aluminum  | Primary aluminum smelter production | Quantities are reported in aluminum content by the references                                    | (47–52)    | Secondary aluminum production, post-consumer (old) scrap only | Quantities are reported in aluminum content by the references | (53, 54)       | Annual average U.S. market spot price for aluminum ingot                                                       | (47–52)    |

| Commodity | World primary production    |                                                                                                                                   |                                                                                                                                                                                                                                               | World secondary production                                                                                                                                                            |                                                              |                | Prices                                                                                                                                                                                                                                               |                                                                                                                                            |
|-----------|-----------------------------|-----------------------------------------------------------------------------------------------------------------------------------|-----------------------------------------------------------------------------------------------------------------------------------------------------------------------------------------------------------------------------------------------|---------------------------------------------------------------------------------------------------------------------------------------------------------------------------------------|--------------------------------------------------------------|----------------|------------------------------------------------------------------------------------------------------------------------------------------------------------------------------------------------------------------------------------------------------|--------------------------------------------------------------------------------------------------------------------------------------------|
|           | Description                 | Assumed content                                                                                                                   | References                                                                                                                                                                                                                                    | Description                                                                                                                                                                           | Assumed content                                              | Reference      | Description                                                                                                                                                                                                                                          | References                                                                                                                                 |
| Antimony  | Antimony mine production    | Quantities are reported in antimony content, except for Laos for years 2009 and 2010, which are reported in 50% antimony content. | (55–60), with additional data for pre-2012 production of Iran (61, 62), Kazakhstan (63–67), Laos (68–70), and Pakistan (71, 72)                                                                                                               | Secondary antimony production from lead-acid battery recycling via secondary lead smelters. Data for year 2007 are not available but are assumed to be the same as those of year 2008 | Quantities are reported in antimony content by the reference | (73, 74)       | 1. New York dealer price for 99.5% to 99.6% antimony metal, including cost, insurance, freight at U.S. ports<br>2. Oxide<br>3. Other<br><br>An average price for each application is calculated based on the consumption combination of these forms. | 1. (55–60)<br>2. Based on unit import value of antimony oxide (75)<br>3. Based on unit of antimony ores and concentrates (Sb content) (75) |
| Arsenic   | Arsenic trioxide production | Quantities reported in arsenic trioxide are converted to arsenic content based on the standard stoichiometric ratio (~75.7%)      | (76–81)                                                                                                                                                                                                                                       | Not available                                                                                                                                                                         | Not applicable                                               | Not applicable | 1. Annual average arsenic metal landed duty-paid U.S. imports' unit value from China<br>2. Annual average arsenic trioxide landed duty-paid U.S. imports' unit value from Morocco                                                                    | (76–81)                                                                                                                                    |
| Barite    | Barite primary production   | Quantities are converted to barium content based on stoichiometric ratio (~58.8%)                                                 | (82–87), with additional data for Afghanistan (88), Armenia (89–91), Bosnia & Herzegovina (92–96), Chile (97), Egypt (98, 99), Nigeria (100, 101), Liberia (102), Poland (103), Portugal (104–106), Saudi Arabia (107–111), and Tunisia (112) | Not applicable                                                                                                                                                                        | Not applicable                                               | Not applicable | Annual average unit value of barite sold or used by processors in the United States by application                                                                                                                                                   | (82–87, 113–115)                                                                                                                           |

| Commodity | World primary production                                |                                                                                                                                                                                                                                                                                                               |                                                                           | World secondary production                                                                                                                  |                                                          |                | Prices                                                                                                                                         |            |
|-----------|---------------------------------------------------------|---------------------------------------------------------------------------------------------------------------------------------------------------------------------------------------------------------------------------------------------------------------------------------------------------------------|---------------------------------------------------------------------------|---------------------------------------------------------------------------------------------------------------------------------------------|----------------------------------------------------------|----------------|------------------------------------------------------------------------------------------------------------------------------------------------|------------|
|           | Description                                             | Assumed content                                                                                                                                                                                                                                                                                               | References                                                                | Description                                                                                                                                 | Assumed content                                          | Reference      | Description                                                                                                                                    | References |
| Bauxite   | Bauxite mine production                                 | Quantities are converted to aluminum content based on Al <sub>2</sub> O <sub>3</sub> content of bauxite ore grades reported in (116) and the standard stoichiometric ratio (~52.9%). For countries not included by the reference, the Al <sub>2</sub> O <sub>3</sub> content of bauxite is assumed to be 41%. | (41–46)                                                                   | Not applicable                                                                                                                              | Not applicable                                           | Not applicable | Annual average U.S. import unit value of bauxite (free alongside ship)                                                                         | (117–123)  |
| Beryllium | Beryl and bertrandite production                        | Quantities are converted to beryllium content assuming a 4% of beryl ore. U.S. bertrandite production is reported in the references in beryl ore equivalent, based on an assumed BeO content of 11%                                                                                                           | (124–129)                                                                 | Not available                                                                                                                               | Not applicable                                           | Not applicable | Annual weighted average unit value of U.S. imports of beryllium-copper master alloy, adjusted for beryllium content, which is assumed to be 4% | (75)       |
| Bismuth   | Primary bismuth refinery production                     | Quantities are reported in bismuth content in references                                                                                                                                                                                                                                                      | (130–135)                                                                 | Aside from an estimate for the United State, no estimates are available for old scrap recycling from other countries                        | Quantities are reported in bismuth content in references | (117–123)      | Annual average U.S. dealer price                                                                                                               | (130–135)  |
| Cadmium   | Cadmium refinery production                             | Quantities are reported in cadmium content by the references                                                                                                                                                                                                                                                  | (136–141)                                                                 | Cadmium is recovered from nickel-cadmium batteries, but limited information is available on production levels except for the United States. | Not applicable                                           | Not applicable | Annual average New York dealer price of cadmium metal (99.95% purity) in 5 short-ton lots                                                      | (117–123)  |
| Cerium    | Estimated cerium content of rare earth oxide production | Quantities are converted into cerium content based on the standard stoichiometric ratio (~81.4%)                                                                                                                                                                                                              | See the “Rare earth oxide production estimation” section of this document | Not available; post-consumer scrap recycling is assumed to be negligible.                                                                   | Not applicable                                           | Not applicable | Annual average China free-on-board export price, cerium oxide, 99.5–99.9% purity                                                               | (142)      |
| Chromium  | Chromite ore production                                 | Quantities are reported in gross weight by the references. The chromic oxide (Cr <sub>2</sub> O <sub>3</sub> ) content of the production of each country is                                                                                                                                                   | (143–148), with data for Finland from (149)                               | Chromium is recycled as a constituent of stainless steel, but country-                                                                      | Not applicable                                           | Not applicable | Annual weighted average unit value of U.S. imports of chromium (all forms), adjusted for                                                       | (75)       |

| Commodity   | World primary production |                                                                                                                                                                                                                                                                                                                                                                                                                                                                                                                                                                                                                                                                                                                                                                                                                                                                          |            | World secondary production              |                 |                | Prices                                                       |            |
|-------------|--------------------------|--------------------------------------------------------------------------------------------------------------------------------------------------------------------------------------------------------------------------------------------------------------------------------------------------------------------------------------------------------------------------------------------------------------------------------------------------------------------------------------------------------------------------------------------------------------------------------------------------------------------------------------------------------------------------------------------------------------------------------------------------------------------------------------------------------------------------------------------------------------------------|------------|-----------------------------------------|-----------------|----------------|--------------------------------------------------------------|------------|
|             | Description              | Assumed content                                                                                                                                                                                                                                                                                                                                                                                                                                                                                                                                                                                                                                                                                                                                                                                                                                                          | References | Description                             | Assumed content | Reference      | Description                                                  | References |
|             |                          | <p>assumed to be as follows: Albania (33%), Australia (43.5%), Finland (25.9%), India (55.9%), Indonesia (54%), Iran (45%), Kazakhstan (51.3%), Kosovo (44%), Madagascar (48%), Oman (50%), Pakistan (52%), Philippines (40%), Russia (38%), South Africa (46% for 44-48% and 42.6% for &lt;44%), Sudan (42%), Turkey (48%), United Arab Emirates (55%), Vietnam (41.4%), and Zimbabwe (55.6%).</p> <p>For certain countries (i.e., Afghanistan, Brazil, China, Greece, and Papua New Guinea), production was reported in chromic oxide content by the original data source and converted by the references into gross weight assuming 44%. This conversion was thus reversed here to obtain chromic oxide content of production for those countries.</p> <p>Quantities are then converted into chromium content based on the standard stoichiometric ratio (~68.4%)</p> |            | specific data are not readily available |                 |                | chromium content                                             |            |
| Cobalt mine | Cobalt mine production   | Quantities are reported in cobalt content by the references                                                                                                                                                                                                                                                                                                                                                                                                                                                                                                                                                                                                                                                                                                                                                                                                              | (150-155)  | Not applicable                          | Not applicable  | Not applicable | Annual average unit value of U.S. cobalt concentrate exports | (75)       |

| Commodity       | World primary production                                                                                               |                                                                                                                                             |                                                                           | World secondary production                                                                                                                                               |                                                                                   |                | Prices                                                                                                        |                         |
|-----------------|------------------------------------------------------------------------------------------------------------------------|---------------------------------------------------------------------------------------------------------------------------------------------|---------------------------------------------------------------------------|--------------------------------------------------------------------------------------------------------------------------------------------------------------------------|-----------------------------------------------------------------------------------|----------------|---------------------------------------------------------------------------------------------------------------|-------------------------|
|                 | Description                                                                                                            | Assumed content                                                                                                                             | References                                                                | Description                                                                                                                                                              | Assumed content                                                                   | Reference      | Description                                                                                                   | References              |
| Cobalt refinery | Cobalt refinery production                                                                                             | Quantities are reported in cobalt content by the references                                                                                 | (150–155)                                                                 | Secondary recovery of cobalt (non-closed loop). Data are only available for years 2010-2016. Production for prior years is assumed to be the same as those of year 2010. | Quantities are reported in cobalt content by the reference                        | (156)          | Annual average U.S. spot price for minimum 99.8% cobalt cathode                                               | (150–155)               |
| Copper mine     | Copper mine production (concentrates and leaching, electrowon)                                                         | Quantities are reported in copper content by the references                                                                                 | (157–162)                                                                 | Not applicable                                                                                                                                                           | Not applicable                                                                    | Not applicable | Annual average unit value of U.S. copper concentrate exports                                                  | (75)                    |
| Copper refinery | Copper primary refinery production, including electrowon                                                               | Quantities are reported in copper content by the references                                                                                 | (157–162)                                                                 | Copper secondary refinery production                                                                                                                                     | Quantities are reported in copper content by the references                       | (157–162)      | Annual average U.S. producer price for copper cathode                                                         | (117–123)               |
| Copper smelter  | Copper primary smelter production, and production that cannot be differentiated between primary and secondary smelters | Quantities are reported in gross weight, which are typically 99% contained copper or, if production is of matte, reported in copper content | (157–162)                                                                 | Copper secondary smelter production                                                                                                                                      | Quantities are reported in gross weight, which are typically 99% contained copper | (157–162)      | Annual average unit value of U.S. copper matte imports                                                        | (75)                    |
| Dysprosium      | Estimated dysprosium content of rare earth oxide production                                                            | Quantities are converted into dysprosium content based on the standard stoichiometric ratio (~87.1%)                                        | See the “Rare earth oxide production estimation” section of this document | Not available; post-consumer scrap recycling is assumed to be negligible.                                                                                                | Not applicable                                                                    | Not applicable | Annual average China free-on-board export price, dysprosium oxide, 99.5% purity                               | (142)                   |
| Feldspar        | Feldspar and nepheline syenite production                                                                              | Not applicable                                                                                                                              | (163–168)                                                                 | Not applicable                                                                                                                                                           | Not applicable                                                                    | Not applicable | 1. Feldspar, average value, marketable production<br>2. Nepheline syenite, U.S. average net import unit value | 1. (117–123)<br>2. (75) |

| Commodity | World primary production                                                                                                                |                                                                                                                                                                                                                                                                              |                                                                                                                                                                                                                                                                                              | World secondary production                                                                                                                                                                        |                                                                |                | Prices                                                                                                                           |                                                                               |
|-----------|-----------------------------------------------------------------------------------------------------------------------------------------|------------------------------------------------------------------------------------------------------------------------------------------------------------------------------------------------------------------------------------------------------------------------------|----------------------------------------------------------------------------------------------------------------------------------------------------------------------------------------------------------------------------------------------------------------------------------------------|---------------------------------------------------------------------------------------------------------------------------------------------------------------------------------------------------|----------------------------------------------------------------|----------------|----------------------------------------------------------------------------------------------------------------------------------|-------------------------------------------------------------------------------|
|           | Description                                                                                                                             | Assumed content                                                                                                                                                                                                                                                              | References                                                                                                                                                                                                                                                                                   | Description                                                                                                                                                                                       | Assumed content                                                | Reference      | Description                                                                                                                      | References                                                                    |
| Gallium   | Primary (low-grade) production                                                                                                          | Quantities are reported in gallium content by the references                                                                                                                                                                                                                 | (169); For years 2007-2011, production quantities are obtained from author of noted reference                                                                                                                                                                                                | Not available; post-consumer scrap recycling is assumed to be negligible (170)                                                                                                                    | Not applicable                                                 | Not applicable | Annual average unit value of U.S. gallium imports                                                                                | (75)                                                                          |
| Germanium | Primary refinery production                                                                                                             | Quantities are reported in germanium content by the references                                                                                                                                                                                                               | Canada (171), China (171, 172), Finland (149), Japan (173), Russia (172, 174-178), and Ukraine (179-183)<br><br>Estimated production data for Belgium and Germany, and more recent Canadian production data, are obtained from personal communication with author of this publication: (172) | Secondary production from old scrap data are available only for the United States. Some old and new scrap production of other countries may, however, be included in the primary production data. | Quantities are reported in germanium content by the references | (117-123)      | 1. Annual average germanium metal ( $\geq 99.99\%$ purity)<br>2. Annual average price germanium dioxide ( $\geq 99.99\%$ purity) | (172), with original data from Argus Media Group – Argus Metals International |
| Gold      | Gold mine production                                                                                                                    | Quantities are reported in gold content by the references                                                                                                                                                                                                                    | (184-189)                                                                                                                                                                                                                                                                                    | Fabricated gold old scrap production                                                                                                                                                              | Quantities are reported in gold content by the references      | (190)          | Annual average Engelhard quotation for gold                                                                                      | (184-189)                                                                     |
| Graphite  | Natural graphite (flake and amorphous) production                                                                                       | Production is reported as marketable graphite, except for India and Turkey which are reported as run-of-mine. Their quantities are converted to marketable as follows: India (15%), Turkey (5%). Note that marketable grade graphite can have variable fixed-carbon content. | (191-196), with revisions based on communication with the author of the references and additional data from Roskill (197)                                                                                                                                                                    | Refractory graphite materials are recycled from various products, but data are not available. High-quality flake graphite is currently not recycled                                               | Not applicable                                                 | (117-123)      | Annual average unit value of U.S. graphite imports                                                                               | (75)                                                                          |
| Helium    | Helium (both grade-A and crude) extracted from natural gas and withdrawn from storage (i.e., extracted from natural gas in prior years) | Quantities are reported in cubic meters (at 101.325 kilopascals absolute pressure and 15°C) of contained helium gas                                                                                                                                                          | (117-123, 198-200)                                                                                                                                                                                                                                                                           | Helium can and is captured and recycled in some applications, but no 18 specific data are available                                                                                               | Not applicable                                                 | Not applicable | Average fiscal year price of crude helium sales by the U.S. government, adjusted for helium content                              | (201-209)                                                                     |

| Commodity | World primary production                                   |                                                                                                     |                                                                                                                                                                                                                                                             | World secondary production                                                                                                                                                                                         |                 |                | Prices                                                                              |            |
|-----------|------------------------------------------------------------|-----------------------------------------------------------------------------------------------------|-------------------------------------------------------------------------------------------------------------------------------------------------------------------------------------------------------------------------------------------------------------|--------------------------------------------------------------------------------------------------------------------------------------------------------------------------------------------------------------------|-----------------|----------------|-------------------------------------------------------------------------------------|------------|
|           | Description                                                | Assumed content                                                                                     | References                                                                                                                                                                                                                                                  | Description                                                                                                                                                                                                        | Assumed content | Reference      | Description                                                                         | References |
| Indium    | Primary indium refinery production                         | Quantities are reported in indium content by the references                                         | (210–215)                                                                                                                                                                                                                                                   | Although there is a significant amount of new scrap generated from indium-tin-oxide (ITO), post-consumer (old scrap) is negligible (170)                                                                           | Not applicable  | Not applicable | Annual average unit value of U.S. indium imports                                    | (75)       |
| Iridium   | Iridium mine production                                    | Quantities are reported in iridium content by the references                                        | South Africa (216–221); Zimbabwe (222–227); Canada’s production is estimated based on information from (228); Russia’s production is estimated based on its exports (229) as reported by trade partners, which are allocated to iridium based on unit value | Secondary production data are not available. However, most iridium secondary production is, believed to be closed-loop toll-refined (e.g., chemical catalysts) and would thus be excluded from the analysis (230). | Not applicable  | Not applicable | Engelhard Corp. unfabricated iridium metal                                          | (117–123)  |
| Iron ore  | Iron ore mine production                                   | Quantities are reported in iron content by the references                                           | (231–236), with additional data for years prior to 2012 for Germany (237, 238), Kenya (239–243), Nigeria (100, 101), Portugal (244), Togo (245), and Uganda (246–250)                                                                                       | Not applicable                                                                                                                                                                                                     | Not applicable  | Not applicable | Annual average unit value of U.S. consumption                                       | (117–123)  |
| Lanthanum | Estimated lanthanum content of rare earth oxide production | Quantities are converted into lanthanum content based on the standard stoichiometric ratio (~85.3%) | See the “Rare earth oxide production estimation” section of this document                                                                                                                                                                                   | Not available; post-consumer scrap recycling is assumed to be negligible.                                                                                                                                          | Not applicable  | Not applicable | Annual average China free-on-board export price, lanthanum oxide, 99.5–99.9% purity | (142)      |
| Lead mine | Lead mine production                                       | Quantities are reported in lead content by the references                                           | (251–256), with additional data for Tajikistan (257)                                                                                                                                                                                                        | Not applicable                                                                                                                                                                                                     | Not applicable  | Not applicable | Annual average unit value of U.S. lead concentrate exports                          | (75)       |



| Commodity         | World primary production                                                                                                                                 |                                                                                                                                                                                                                                                                                                                                                                                                   |                                                            | World secondary production                                                                                                       |                                                           |                                                                                                                                                                          | Prices                                                                                     |            |
|-------------------|----------------------------------------------------------------------------------------------------------------------------------------------------------|---------------------------------------------------------------------------------------------------------------------------------------------------------------------------------------------------------------------------------------------------------------------------------------------------------------------------------------------------------------------------------------------------|------------------------------------------------------------|----------------------------------------------------------------------------------------------------------------------------------|-----------------------------------------------------------|--------------------------------------------------------------------------------------------------------------------------------------------------------------------------|--------------------------------------------------------------------------------------------|------------|
|                   | Description                                                                                                                                              | Assumed content                                                                                                                                                                                                                                                                                                                                                                                   | References                                                 | Description                                                                                                                      | Assumed content                                           | Reference                                                                                                                                                                | Description                                                                                | References |
| Lead refinery     | Primary lead refinery production. For certain countries primary and secondary production cannot be differentiated and are thus included in this analysis | Quantities are reported in lead content by the references                                                                                                                                                                                                                                                                                                                                         | (251–256)                                                  | Secondary lead refinery (old scrap only)                                                                                         | Quantities are reported in lead content by the references | (251–256), with additional data for Bosnia & Herzegovina (92–96), Ghana (258), Lebanon (259, 260), Nigeria (100, 101, 261), Sri Lanka (262–264), and Venezuela (265–267) | North American producer price (2007-2012); North American market price (2013-2016)         | (251–256)  |
| Lithium           | Lithium minerals and brine production                                                                                                                    | Lithium chemicals are converted to their lithium content based on the standard stoichiometric ratio (e.g., Li <sub>2</sub> CO <sub>3</sub> : 18.8%, LiCl: 16.4%). Lithium hydroxide production is excluded to avoid double-counting. Lithium content for the production of other countries were varied from 2-3% depending on country and year based on recommendation from author of references. | (268–273), with revisions provided by author of references | Recycling is estimated to have contributed around 1% of refined lithium production (274)                                         | Not applicable                                            | Not applicable                                                                                                                                                           | Annual average unit value of U.S. lithium imports, all forms, adjusted for lithium content | (75)       |
| Magnesium (metal) | Primary magnesium metal production; For some countries (e.g., Russia), secondary production cannot be differentiated from primary and is thus included   | Quantities are reported in magnesium content by the references                                                                                                                                                                                                                                                                                                                                    | (275–280)                                                  | Aside from old scrap recycling of magnesium metal or otherwise included in the primary production statistics, not are available. | Not applicable                                            | Not applicable                                                                                                                                                           | Yearend U.S. Western spot price for magnesium metal                                        | (117–123)  |

| Commodity  | World primary production                                                       |                                                                                                                                                                                                                                                                                                                                                                         |                                                                                                                                                                                                                                                                                                                                                                                                                                                                                                                                | World secondary production                                                                                                                                                                                                 |                                                                |                | Prices                                                                                         |                     |
|------------|--------------------------------------------------------------------------------|-------------------------------------------------------------------------------------------------------------------------------------------------------------------------------------------------------------------------------------------------------------------------------------------------------------------------------------------------------------------------|--------------------------------------------------------------------------------------------------------------------------------------------------------------------------------------------------------------------------------------------------------------------------------------------------------------------------------------------------------------------------------------------------------------------------------------------------------------------------------------------------------------------------------|----------------------------------------------------------------------------------------------------------------------------------------------------------------------------------------------------------------------------|----------------------------------------------------------------|----------------|------------------------------------------------------------------------------------------------|---------------------|
|            | Description                                                                    | Assumed content                                                                                                                                                                                                                                                                                                                                                         | References                                                                                                                                                                                                                                                                                                                                                                                                                                                                                                                     | Description                                                                                                                                                                                                                | Assumed content                                                | Reference      | Description                                                                                    | References          |
| Manganese  | Manganese ore production                                                       | Quantities are reported in manganese content by the references, except for a few instances where only gross weight is reported: Egypt (content is assumed to be 30% for year 2007); Morocco (content is assumed to be 53% for years 2007-2011); Sudan (content is assumed to be 29% for years 2007 and 2009), Turkey (content is assumed to be 36% for years 2007-2011) | (117, 281–285), with production of “other” countries delineated based on data for Bulgaria (286–290), Burkina Faso (291–293), Chile (97, 294, 295), Côte d’Ivoire (292, 293, 296–299), Egypt (98, 99, 300–302), Georgia (303–307), Greece (308), Hungary (309–314), Indonesia (315–319), Iran (61, 62, 320–322), Morocco (323–327), Namibia (328–332), Oman (333), Philippines (334–338), Romania (339–341), Sudan (342, 343), Thailand (344–348), Turkey (349–353), Russia (174–178), Vietnam (354–358), and Zambia (359–363) | Manganese is recycled as a constituent of ferrous and nonferrous scrap as well as from steel slag. The recovery of scrap specifically for manganese is, however, negligible. (117) It is thus excluded from this analysis. | Not applicable                                                 | Not applicable | Annual average unit value of U.S. manganese imports, all forms, adjusted for manganese content | (75)                |
| Mica       | Mica production (all grades and forms)                                         | Not applicable                                                                                                                                                                                                                                                                                                                                                          | (364–369), with additional pre-2012 production data for Austria (370–374) and Zimbabwe (223–226). China’s pre-2012 production data are obtained from (375–379)                                                                                                                                                                                                                                                                                                                                                                 | Not applicable                                                                                                                                                                                                             | Not applicable                                                 | Not applicable | Annual average unit value of mica consumption by end-use as reported by the references         | (364–369, 380, 381) |
| Molybdenum | Molybdenum mine production and recovery as byproduct of copper mine production | Quantities are reported in molybdenum content by the references                                                                                                                                                                                                                                                                                                         | (382–387)                                                                                                                                                                                                                                                                                                                                                                                                                                                                                                                      | Global molybdenum recovered from secondary sources (not differentiated by country) as estimated by the reference for years 2009-2016. For years 2007 and 2008, quantities for year 2009 are utilizes                       | Quantities are reported in molybdenum content by the reference | (388)          | Time-weighted average price of molybdenum contained in technical-grade molybdic oxide          | (117–123)           |

| Commodity    | World primary production                                                                                                                                                                                          |                                                                                                     |                                                                           | World secondary production                                                                                                                                               |                 |                | Prices                                                                                          |            |
|--------------|-------------------------------------------------------------------------------------------------------------------------------------------------------------------------------------------------------------------|-----------------------------------------------------------------------------------------------------|---------------------------------------------------------------------------|--------------------------------------------------------------------------------------------------------------------------------------------------------------------------|-----------------|----------------|-------------------------------------------------------------------------------------------------|------------|
|              | Description                                                                                                                                                                                                       | Assumed content                                                                                     | References                                                                | Description                                                                                                                                                              | Assumed content | Reference      | Description                                                                                     | References |
| Neodymium    | Estimated neodymium content of rare earth oxide production                                                                                                                                                        | Quantities are converted into neodymium content based on the standard stoichiometric ratio (~85.7%) | See the "Rare earth oxide production estimation" section of this document | Not available; post-consumer scrap recycling is assumed to be negligible.                                                                                                | Not applicable  | Not applicable | Annual average China free-on-board export price, neodymium oxide, 99.5-99.9% purity             | (142)      |
| Nickel mine  | Nickel mine production                                                                                                                                                                                            | Quantities are reported in nickel content by the references                                         | (389-394)                                                                 | Not applicable                                                                                                                                                           | Not applicable  | Not applicable | Annual average price of U.S. export of nickel ores and concentrates adjusted for nickel content | (75)       |
| Nickel plant | Production of nickel metal (includes cathode and briquets); high-nickel pig iron and ferronickel; nickel chemicals (including powder, salts, and solutions); oxide sinter; and other unspecified plant production | Quantities are reported in nickel content by the references                                         | (389-394)                                                                 | Nickel is recycled as a constituent of stainless steel, but country-specific data are not readily available                                                              | Not applicable  | Not applicable | Annual average London Metal Exchange nickel price, cash                                         | (118-123)  |
| Niobium      | Niobium mineral concentrate production                                                                                                                                                                            | Quantities are reported in niobium content by the references                                        | (395-400)                                                                 | Niobium-containing steels and superalloys were recycled, but data are not available. Recycling of materials specifically for their niobium content was negligible (117). | Not applicable  | Not applicable | Annual average unit value of U.S. niobium imports, all forms, adjusted for niobium content      | (75)       |

| Commodity    | World primary production                                      |                                                                                                                                                       |                                                                                        | World secondary production                                                                                                          |                                                               |                | Prices                                                                                   |                |
|--------------|---------------------------------------------------------------|-------------------------------------------------------------------------------------------------------------------------------------------------------|----------------------------------------------------------------------------------------|-------------------------------------------------------------------------------------------------------------------------------------|---------------------------------------------------------------|----------------|------------------------------------------------------------------------------------------|----------------|
|              | Description                                                   | Assumed content                                                                                                                                       | References                                                                             | Description                                                                                                                         | Assumed content                                               | Reference      | Description                                                                              | References     |
| Palladium    | Palladium mine production                                     | Quantities are reported in palladium content by the references                                                                                        | (401–406), with additional data for China (375, 376, 407)                              | Refined palladium production from secondary sources including end-of-life automotive catalytic converters, jewelry, and electronics | Quantities are reported in palladium content by the reference | (407)          | Engelhard Corp. unfabricated palladium metal                                             | (117–123)      |
| Phosphate    | Phosphate rock production                                     | Quantities, reported in P <sub>2</sub> O <sub>5</sub> content, are converted to phosphate content based on the standard stoichiometric ratio (~43.6%) | (408–413)                                                                              | None                                                                                                                                | Not applicable                                                | Not applicable | Annual average price (free-on-board) of marketable phosphate rock (all grades)           | (117–123)      |
| Platinum     | Platinum mine production                                      | Quantities are reported in platinum content by the references                                                                                         | (401–406), with additional data for China (375, 376, 407)                              | Refined platinum production from secondary sources including end-of-life automotive catalytic converters, jewelry, and electronics  | Quantities are reported in platinum content by the reference  | (407)          | Engelhard Corp. unfabricated platinum metal                                              | (117–123)      |
| Potash       | Marketable potash production                                  | Quantities, reported in K <sub>2</sub> O equivalent, are converted to potassium content based on the stoichiometric ratio (~83%)                      | (414–419)                                                                              | None                                                                                                                                | Not applicable                                                | Not applicable | Annual average unit value of U.S. potash imports, all forms, adjusted for potash content | (75)           |
| Praseodymium | Estimated praseodymium content of rare earth oxide production | Quantities are converted into praseodymium content based on the standard stoichiometric ratio (~82.8%)                                                | See the “Rare earth oxide production estimation” section of this document              | Not available; post-consumer scrap recycling is assumed to be negligible.                                                           | Not applicable                                                | Not applicable | Annual average China free-on-board export price, praseodymium oxide, 99.5-99.9% purity   | (142)          |
| Rhenium      | Primary rhenium production                                    | Quantities are reported in rhenium content by references                                                                                              | (420–425); Data for “Other” countries are not disaggregated due to lack of information | Rhenium is recycled, but country-specific information is not readily available                                                      | Not applicable                                                | Not applicable | Annual average price of rhenium metal pellets (99.99% pure)                              | (117–123, 426) |

| Commodity | World primary production                                  |                                                                                           |                                                                                                                                                                                                                                                               | World secondary production                                                                                                                                                                                         |                                                             |                                                                    | Prices                                                                                |            |
|-----------|-----------------------------------------------------------|-------------------------------------------------------------------------------------------|---------------------------------------------------------------------------------------------------------------------------------------------------------------------------------------------------------------------------------------------------------------|--------------------------------------------------------------------------------------------------------------------------------------------------------------------------------------------------------------------|-------------------------------------------------------------|--------------------------------------------------------------------|---------------------------------------------------------------------------------------|------------|
|           | Description                                               | Assumed content                                                                           | References                                                                                                                                                                                                                                                    | Description                                                                                                                                                                                                        | Assumed content                                             | Reference                                                          | Description                                                                           | References |
| Rhodium   | Rhodium mine production                                   | Quantities are reported in rhodium content by references                                  | South Africa (216–221); Russia and Canada (407); Zimbabwe (427–432); United States (433)                                                                                                                                                                      | Refined rhodium production from end-of-life automotive catalytic converters                                                                                                                                        | Quantities are reported in rhodium content by the reference | (407)                                                              | Engelhard Corp. unfabricated rhodium metal                                            | (117–123)  |
| Ruthenium | Ruthenium mine production                                 | Quantities are reported in ruthenium content by references                                | South Africa (216–221); Zimbabwe (222–227); Canada's production is estimated based on information from (228); Russia's production is estimated based on its exports (229) as reported by trade partners, which are allocated to ruthenium based on unit value | Secondary production data are not available. However, most iridium secondary production is, believed to be closed-loop toll-refined (e.g., chemical catalysts) and would thus be excluded from the analysis (230). | Not applicable                                              | Not applicable                                                     | Engelhard Corp. unfabricated ruthenium metal                                          | (117–123)  |
| Samarium  | Estimated samarium content of rare earth oxide production | Quantities are converted into samarium content based on the standard stoichiometric ratio | See the "Rare earth oxide production estimation" section of this document                                                                                                                                                                                     | Not available                                                                                                                                                                                                      | Not applicable                                              | Not applicable                                                     | Annual average China free-on-board export price, samarium oxide, 99.5% purity         | (142)      |
| Selenium  | Primary selenium production                               | Quantities are reported in selenium content by the references                             | (434–439), with additional data for China from (375, 440). Production data of the United States are not available but they, along with any industry stock changes, are assumed to equal U.S. exports                                                          | Not available                                                                                                                                                                                                      | Not applicable                                              | Not applicable                                                     | U.S. spot market price for selenium metal powder, minimum 99.5% purity, in 5-ton lots | (117–123)  |
| Silver    | Silver mine production                                    | Quantities are reported in silver content by the references                               | (441–446)                                                                                                                                                                                                                                                     | Silver recovered from new and old scrap                                                                                                                                                                            | Quantities are reported in silver content by the references | (441–446) for the United States; (447–449) for all other countries | Engelhard's industrial bullion quotations                                             | (117–123)  |

| Commodity   | World primary production                                                                |                                                                                                                                                                                                                                                                        |                                                                                                                                                                                                                                                                                                                                                                                     | World secondary production                                                                          |                                                              |                | Prices                                                                                         |            |
|-------------|-----------------------------------------------------------------------------------------|------------------------------------------------------------------------------------------------------------------------------------------------------------------------------------------------------------------------------------------------------------------------|-------------------------------------------------------------------------------------------------------------------------------------------------------------------------------------------------------------------------------------------------------------------------------------------------------------------------------------------------------------------------------------|-----------------------------------------------------------------------------------------------------|--------------------------------------------------------------|----------------|------------------------------------------------------------------------------------------------|------------|
|             | Description                                                                             | Assumed content                                                                                                                                                                                                                                                        | References                                                                                                                                                                                                                                                                                                                                                                          | Description                                                                                         | Assumed content                                              | Reference      | Description                                                                                    | References |
| Strontium   | Celestite production                                                                    | Quantities are converted to strontium content using a factor ~43.9% based on assumed SrSO <sub>4</sub> grade of 92% and a stoichiometric ratio of ~47.7%, except for Iran for which an average grade of 86.5% is assumed (450), yielding a strontium content of ~41.3% | (451–456)                                                                                                                                                                                                                                                                                                                                                                           | None                                                                                                | Not applicable                                               | Not applicable | Annual average unit value of U.S. strontium imports, all forms, adjusted for strontium content | (75)       |
| Tantalum    | Tantalum mineral concentrate production, which does not include tantalum from tin slags | Quantities are reported in tantalum content by the references                                                                                                                                                                                                          | (457, 458)                                                                                                                                                                                                                                                                                                                                                                          | Estimated quantity of tantalum recovered from old scrap are available but not delineated by country | Quantities are reported in tantalum content by the reference | (11)           | Annual average unit value of U.S. tantalum imports, all forms, adjusted for tantalum content   | (75)       |
| Tellurium   | Tellurium refinery production (for years 2010-2016 only)                                | Quantities are reported in tellurium content by references                                                                                                                                                                                                             | Bulgaria (286, 287), Canada (459), China (440), Japan and Russia (434–436), Peru (460), South Africa (216–218), Sweden (461). Data for other countries (Chile, Germany, India, Indonesia, Kazakhstan, Mexico, Philippines, Peru, Republic of Korea, Spain, and Uzbekistan) are from (171) for year 2011 and assumed constant for all other years due to lack of better information. | Not available, but recovery from old scrap is assumed to be very small                              | Not applicable                                               | (117–123)      | Annual average tellurium price, 99.95% purity                                                  | (117–123)  |
| Tin mine    | Tin mine production                                                                     | Quantities are reported in tin content by references                                                                                                                                                                                                                   | (462–467)                                                                                                                                                                                                                                                                                                                                                                           | Not applicable                                                                                      | Not applicable                                               | Not applicable | Annual average unit value of U.S. tin ores and concentrates exports, adjusted for tin content  | (75)       |
| Tin smelter | Tin primary smelter production                                                          | Quantities are reported in tin content by references                                                                                                                                                                                                                   | (462–467)                                                                                                                                                                                                                                                                                                                                                                           | Tin secondary smelter production                                                                    | Quantities are reported in tin content by references         | (462–467)      | Annual average New York dealer/market price                                                    | (117–123)  |

| Commodity                    | World primary production                                                                                                            |                                                                                                                                                                                                                                                                              |                                                                          | World secondary production                                                                                                                                                                                      |                                                               |                | Prices                                                                                               |            |
|------------------------------|-------------------------------------------------------------------------------------------------------------------------------------|------------------------------------------------------------------------------------------------------------------------------------------------------------------------------------------------------------------------------------------------------------------------------|--------------------------------------------------------------------------|-----------------------------------------------------------------------------------------------------------------------------------------------------------------------------------------------------------------|---------------------------------------------------------------|----------------|------------------------------------------------------------------------------------------------------|------------|
|                              | Description                                                                                                                         | Assumed content                                                                                                                                                                                                                                                              | References                                                               | Description                                                                                                                                                                                                     | Assumed content                                               | Reference      | Description                                                                                          | References |
| Titanium metal               | Titanium sponge metal production                                                                                                    | Quantities are reported in titanium content by references                                                                                                                                                                                                                    | (117–123, 198–200)                                                       | The majority of titanium metal recycled is new scrap (i.e., revert). Specific old scrap statistics are generally not available and are thus excluded from this analysis.                                        | Not applicable                                                | Not applicable | Yearend titanium metal price                                                                         | (117–123)  |
| Titanium mineral concentrate | Titanium mineral production, including ilmenite, leucoxene, rutile, and titaniferous slag                                           | Ilmenite and leucoxene are assumed to be 60% TiO <sub>2</sub> ; rutile is assumed to be 94% TiO <sub>2</sub> ; titaniferous slag is assumed to be 85% TiO <sub>2</sub> . Titanium content of TiO <sub>2</sub> is calculated based on the standard stoichiometric ratio (60%) | (468–473), with additional pre-2011 production data for Turkey (350–353) | Not applicable                                                                                                                                                                                                  | Not applicable                                                | Not applicable | Annual average unit value of U.S. titanium mineral concentrate imports adjusted for titanium content | (75)       |
| Tungsten                     | Tungsten concentrate production                                                                                                     | Quantities are reported in tungsten content by the references                                                                                                                                                                                                                | (474–479)                                                                | Secondary tungsten production. Data are not disaggregated by country.                                                                                                                                           | Quantities are reported in tungsten content by the references | (480, 481)     | Annual average U.S. spot price for tungsten concentrate calculated from weekly prices                | (474–479)  |
| Vanadium                     | Production of vanadium feedstock from ores and concentrates, steel slags from vanadiferous iron ores, and as a byproduct of uranium | Quantities are reported in vanadium content by the references                                                                                                                                                                                                                | (482–487), with additional data from (488)                               | Vanadium recovered from spent catalyst, petroleum residues, and fly ash. Due to lack of data for years prior to 2010, secondary production for years 2007–2009 are assumed to be the same as those of year 2010 | Quantities are reported in vanadium content by the references | (488)          | Annual average unit value of U.S. vanadium imports (all forms), adjusted for vanadium content        | (75)       |

| Commodity    | World primary production                                                                                                                                                           |                                                                                                                                                                                                                                                                                            |                                                                           | World secondary production                                                |                                                       |                | Prices                                                                                                        |            |
|--------------|------------------------------------------------------------------------------------------------------------------------------------------------------------------------------------|--------------------------------------------------------------------------------------------------------------------------------------------------------------------------------------------------------------------------------------------------------------------------------------------|---------------------------------------------------------------------------|---------------------------------------------------------------------------|-------------------------------------------------------|----------------|---------------------------------------------------------------------------------------------------------------|------------|
|              | Description                                                                                                                                                                        | Assumed content                                                                                                                                                                                                                                                                            | References                                                                | Description                                                               | Assumed content                                       | Reference      | Description                                                                                                   | References |
| Yttrium      | Estimated yttrium content of rare earth oxide production                                                                                                                           | Quantities are converted into yttrium content based on the standard stoichiometric ratio (~78.7%)                                                                                                                                                                                          | See the “Rare earth oxide production estimation” section of this document | Not available; post-consumer scrap recycling is assumed to be negligible. | Not applicable                                        | Not applicable | Annual average China free-on-board export price, yttrium oxide, 99.999% purity                                | (142)      |
| Zinc mine    | Zinc mine production                                                                                                                                                               | Quantities are reported in zinc content of concentrates and direct shipping ores by references                                                                                                                                                                                             | (489–494)                                                                 | Not applicable                                                            | Not applicable                                        | Not applicable | Annual weighted-average unit value of U.S. zinc concentrate imports and exports                               | (75)       |
| Zinc smelter | Primary zinc smelter production. In certain cases, primary and secondary smelter production are not differentiated. Undifferentiated production is included as primary production. | Quantities are reported in zinc content by references                                                                                                                                                                                                                                      | (489–494)                                                                 | Zinc secondary smelter production                                         | Quantities are reported in zinc content by references | (489–494)      | Platts Metals Week annual average price for North American SHG zinc; based on the LME cash price plus premium | (489–494)  |
| Zirconium    | Zirconium mineral concentrate production                                                                                                                                           | Quantities, which are reported in gross weight by the references gross, are converted to zirconium content as follows: ~73% for Russia (given that it is reported as 98% ZrO <sub>2</sub> ); ~50% for all other countries (assuming they are reporting production as ZrSiO <sub>4</sub> ). | (495–500)                                                                 | Zirconium is recycled but country-specific are not available              | Not applicable                                        | Not applicable | Annual average unit value of U.S. zirconium imports (all forms), adjusted for zirconium content               | (75)       |

A full list of references cited in this Supplementary Materials can be found on the following website: <https://doi.org/10.5281/zenodo.3595382>.



## **Commodities with data for multiple production stages**

For eight commodities (aluminum, cobalt, copper, lead, nickel, tin, titanium, and zinc) production data are available for multiple production stages. For example, production data are available for bauxite mining, alumina refining, and aluminum smelting. To determine which of these sequential production stages poses the greatest risk (i.e., the potential “bottleneck”), the DP, TE, and EV indicator scores are assessed independently for each stage. The stage with the highest indicator scores among the production stages in a given year is then used as the score for that particular commodity for that year.

For aluminum, bauxite mine, alumina refinery, and aluminum smelter production were assessed. For cobalt, mine and refinery production were assessed. For copper, mine, smelter, and refinery production were assessed. For lead, mine and refinery production were assessed. For nickel, mine and plant production were assessed. For tin, mine and smelter production were assessed. For titanium, titanium mineral concentrate and titanium metal production were assessed. For zinc, mine and smelter production were assessed. Descriptions and data sources for each of these process stages are provided in table S1.

For the DP indicator, the stages with the highest scores for the eight commodities were aluminum smelter, cobalt mine, copper smelter, lead mine, nickel plant, tin smelter, titanium metal, and zinc smelter. These stages had the highest DP indicator scores for their respective commodities for all years of the analysis with the following exceptions: tin mine had the higher scores for years 2007 and 2008 and lead refinery had the higher scores for years 2009 and 2010.

For the TE indicator, the stages with the highest scores for the eight commodities were bauxite, cobalt refinery, copper refinery, lead refinery, nickel plant, tin smelter, titanium mineral concentrate, and zinc smelter. These stages had the highest TE indicators scores for their respective commodities for all years of the analysis with no exceptions.

For the EV indicator, the stages with the highest scores for the eight commodities were aluminum smelter, cobalt refinery, copper refinery, lead refinery, nickel plant, tin smelter, titanium mineral concentrate, and zinc smelter. These stages had the highest EV indicators scores for their respective commodities for all years of the analysis with the following exceptions: titanium metal had the higher scores for years 2007, 2011, 2014.

## Willingness to Supply Index

The Willingness to Supply Index (WSI) is comprised of three components: Trade Ties (TT), Shared Values (SV), and Military Cooperation (MC). TT refers to the extent of trade that a country has with the United States as is measured as the monetary sum of its imports and exports with the United States in a given year relative to its gross domestic product (GDP)

$$TT_{t,c \leftrightarrow USA}^{raw} = \frac{\sum(I_{t,c \leftarrow USA}, E_{t,c \rightarrow USA})}{GDP_{t,c}} \quad \text{Eq. S1}$$

where for country  $c$  in year  $t$ ,  $I$  and  $E$  are its reported imports and exports of all commodities (i.e., all trade) with the United States in monetary terms and GDP is its gross domestic product in current U.S. dollars. Trade data are obtained from United Nations Comtrade Database (501), while GDP data are obtained from the World Bank (502) or, if not provided by the World Bank, the International Monetary Fund (503). To normalize the raw TT scores, the following equation was utilized

$$TT_{t,c \leftrightarrow USA}^{norm.} = \max\left(1 - \log_{10}\left(100 * (TT_{t,c \leftrightarrow USA}^{raw} + 1\%)\right), 1\%\right) \quad \text{Eq. S2}$$

Note that this normalization limits TT scores such that a country with a total trade value with the United States greater than or equal to 9% of its GDP yields a score of 1 and no country receives a TT score lower than 0.01.

Shared Values (SV) refers to the extent to which a country shares similar ideological values with the United States. To assess SV, Freedom House's *Freedom in the World (FIW)* reports are utilized (36). The reports assess the political rights and civil liberties of over 195 countries and 14 territories through 25 indicators that are aggregated to several subcategories: Electoral Process, Political Pluralism and Participation, Functioning of Government, Political Rights, Freedom of Expression and Belief, Associational and Organizational Rights, Rule of Law, Personal Autonomy and Individual Rights. To determine how 'close' a specific country is to the United States, the Euclidean distance between the country in question,  $c$ , and the United States is calculated across all FIW subcategories,  $s$

$$SV_{t,c \leftrightarrow USA}^{raw} = \sum_s (Subcategory_{s,t,c} - Subcategory_{s,t,USA})^2 \quad \text{Eq. S3}$$

The raw SV scores are then scaled such that the maximum observed value across all countries and years is given a score of 1.

Military Cooperation (MC) is based on whether or not a country has a current collective defense arrangement with the United States (504). This includes countries that are currently part of the North Atlantic Treaty Organization (NATO), the Inter-American Treat of Reciprocal Assistance (Rio Treaty), as well as other bi- and trilateral mutual defense agreements.

Figure S1 displays the results for TT, SV, and WSI, which is calculated as the simple average of these two components less 0.1 for any those that have collective defense arrangement (MC) for each year of the analysis. Lower scores, shaded in green, suggest a greater willingness to supply to the United States. Data limitations precluded the inclusion of all countries. In such cases, WSI was calculated based on the scores of the available component.

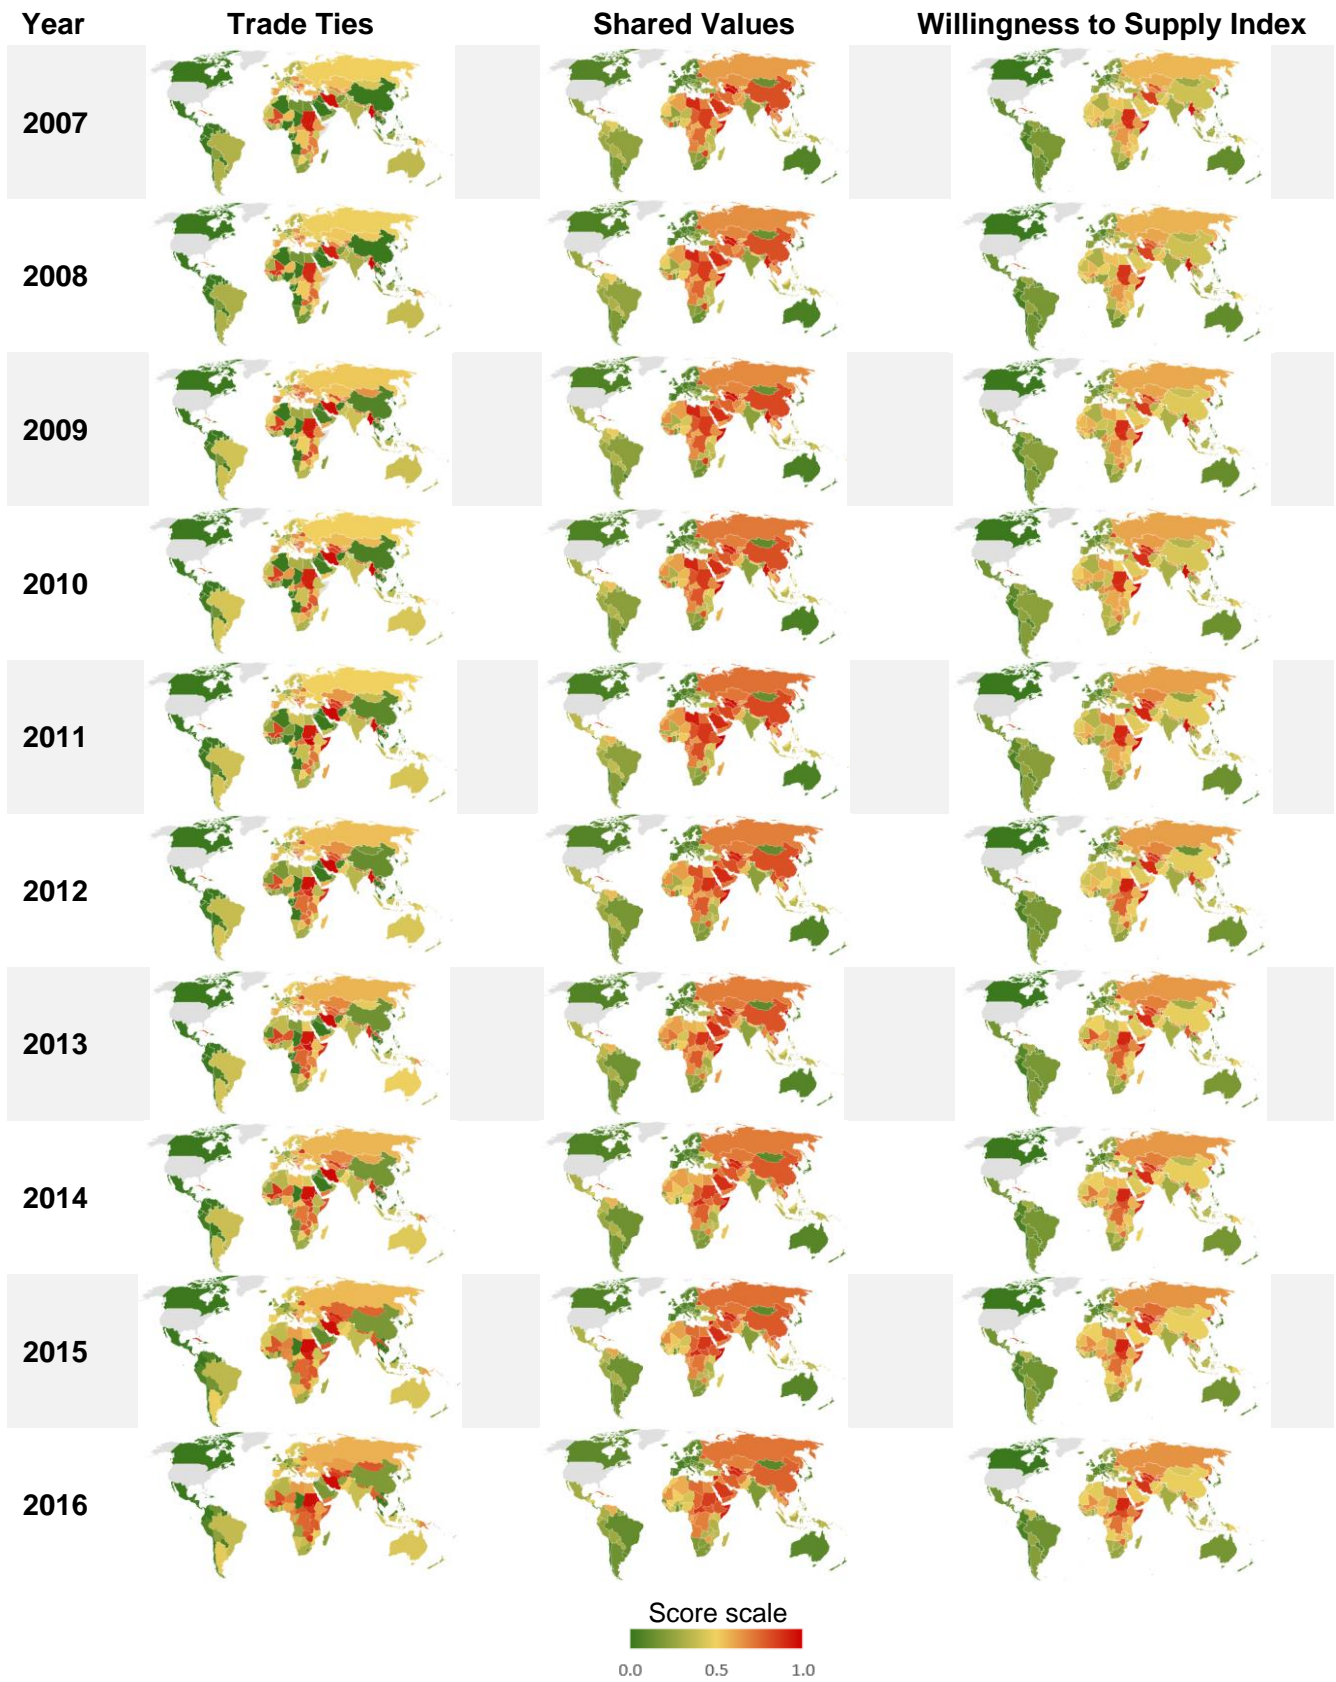

**Fig. S1. WSI and constituent components by year.**



| Commodity | U.S. primary production                                                                                                     |                                                                                                                            | U.S. secondary production                                                                                                              |                | U.S. imports                                                                                                                                           |                                                                                                                                                                                                        | U.S. exports                                                                                                               |                                                                                                                                                                                                        | Stocks changes                                                                                                                                                                                              |                |
|-----------|-----------------------------------------------------------------------------------------------------------------------------|----------------------------------------------------------------------------------------------------------------------------|----------------------------------------------------------------------------------------------------------------------------------------|----------------|--------------------------------------------------------------------------------------------------------------------------------------------------------|--------------------------------------------------------------------------------------------------------------------------------------------------------------------------------------------------------|----------------------------------------------------------------------------------------------------------------------------|--------------------------------------------------------------------------------------------------------------------------------------------------------------------------------------------------------|-------------------------------------------------------------------------------------------------------------------------------------------------------------------------------------------------------------|----------------|
|           | Description                                                                                                                 | References                                                                                                                 | Description                                                                                                                            | References     | HTS codes                                                                                                                                              | Assumed content                                                                                                                                                                                        | HTS codes                                                                                                                  | Assumed content                                                                                                                                                                                        | Description                                                                                                                                                                                                 | References     |
|           |                                                                                                                             |                                                                                                                            |                                                                                                                                        |                | 7604291000<br>7604293010<br>7604293050<br>7604295030<br>7604295060<br>7606113030<br>7606113060<br>7606116000<br>7606123030<br>7606123070<br>7606126000 | 1<br>1<br>1<br>1<br>1<br>1<br>1<br>1<br>1<br>1<br>1                                                                                                                                                    | 7604293050<br>7604295030<br>7604295060<br>7606113030<br>7606113060<br>7606116000<br>7606123030<br>7606123070<br>7606126000 | 1<br>1<br>1<br>1<br>1<br>1<br>1<br>1<br>1                                                                                                                                                              | (includes alloyed aluminum)                                                                                                                                                                                 |                |
| Antimony  | No U.S. mine production; primary smelter production excluded because the net imports of ores and concentrates are included. | Not applicable                                                                                                             | Secondary antimony in the form antimonial lead from lead battery recycling via secondary lead smelter production                       | (73, 74)       | 2617100000<br>2620910000<br>2825800000<br>8110000000<br>8110100000<br>8110200000<br>8110900000<br>7801910000                                           | 1<br>1<br>0.835<br>1<br>1<br>1<br>1<br>0.04                                                                                                                                                            | 2617100000<br>2620910000<br>2825800000<br>8110000000<br>8110100000<br>8110200000<br>8110900000<br>7801910000               | 1<br>1<br>0.835<br>1<br>1<br>1<br>1<br>0.04                                                                                                                                                            | No U.S. government stocks or representative industry stock changes are available                                                                                                                            | Not applicable |
| Arsenic   | No U.S. production                                                                                                          | Not applicable                                                                                                             | Aside from new scrap from gallium arsenide wafers (which are excluded), there is no information available on U.S. secondary production | Not applicable | 2804800000<br>2811191000<br>2811291000<br>2813901000<br>2851000010<br>2853000010                                                                       | 1<br>0.777<br>0.757<br>0.607<br>0.518<br>0.518                                                                                                                                                         | 2804800000                                                                                                                 | 1                                                                                                                                                                                                      | Not available                                                                                                                                                                                               | Not applicable |
| Barite    | Barite primary production                                                                                                   | (82-87)                                                                                                                    | Not applicable                                                                                                                         | Not available  | 2511101000<br>2511105000<br>2833270000                                                                                                                 | 0.588<br>0.588<br>0.588                                                                                                                                                                                | 2511100000<br>2833270000                                                                                                   | 0.588<br>0.588<br>0.588                                                                                                                                                                                | Not available                                                                                                                                                                                               | Not applicable |
| Bauxite   | Bauxite mine production                                                                                                     | (41-46), production data for the United States are withheld by references to avoid disclosing company priority information | Not applicable                                                                                                                         | Not applicable | 2606000030<br>2606000060<br>2606000090                                                                                                                 | Quantities are converted to aluminum content based on Al <sub>2</sub> O <sub>3</sub> content of bauxite ore grades reported in (116) and the standard stoichiometric ratio (~52.9%). For countries not | 2606000030<br>2606000060<br>2606000090                                                                                     | Quantities are converted to aluminum content based on Al <sub>2</sub> O <sub>3</sub> content of bauxite ore grades reported in (116) and the standard stoichiometric ratio (~52.9%). For countries not | U.S. industry stock release, includes all forms of bauxite (dry weight equivalent, converted to aluminum content). For certain years, quantities are withheld by the references to avoid disclosing company | (117-123, 198) |

| Commodity | U.S. primary production                     |                                                                                                                              | U.S. secondary production                                                                                                                            |                | U.S. imports                                                                                                                             |                                                                                     | U.S. exports                                                                                   |                                                                                     | Stocks changes                                                                                                                                               |                    |
|-----------|---------------------------------------------|------------------------------------------------------------------------------------------------------------------------------|------------------------------------------------------------------------------------------------------------------------------------------------------|----------------|------------------------------------------------------------------------------------------------------------------------------------------|-------------------------------------------------------------------------------------|------------------------------------------------------------------------------------------------|-------------------------------------------------------------------------------------|--------------------------------------------------------------------------------------------------------------------------------------------------------------|--------------------|
|           | Description                                 | References                                                                                                                   | Description                                                                                                                                          | References     | HTS codes                                                                                                                                | Assumed content                                                                     | HTS codes                                                                                      | Assumed content                                                                     | Description                                                                                                                                                  | References         |
|           |                                             |                                                                                                                              |                                                                                                                                                      |                |                                                                                                                                          | listed, the Al <sub>2</sub> O <sub>3</sub> content of bauxite is assumed to be 41%. |                                                                                                | listed, the Al <sub>2</sub> O <sub>3</sub> content of bauxite is assumed to be 41%. | proprietary data.                                                                                                                                            |                    |
| Beryllium | Bertrandite ore production                  | (124–129)                                                                                                                    | Not available                                                                                                                                        | Not applicable | 2617900030<br>2825901000<br>7405006030<br>7409901030<br>7409905030<br>7409909030<br>8112113000<br>8112116000<br>8112120000<br>8112130000 | 0.04<br>0.36<br>0.04<br>0.015<br>0.015<br>0.015<br>1<br>1<br>1<br>1                 | 8112113000<br>8112116000<br>8112120000<br>8112130000                                           | 1<br>1<br>1<br>1                                                                    | U.S. industry stock releases and U.S. government national defense stockpile release, including beryl ore, beryllium-copper master alloy, and beryllium metal | (124–129, 507–511) |
| Bismuth   | No U.S. primary bismuth refinery production | (130–135)                                                                                                                    | Estimated secondary production from old scrap                                                                                                        | (117–123)      | 2834220000<br>2834290500<br>2836930000<br>2836992000<br>3823903100<br>3824903100<br>3824993100<br>8106000000                             | 0.431<br>0.431<br>0.82<br>0.82<br>1<br>1<br>1<br>1                                  | 2834220000<br>2834290500<br>2836930000<br>2836992000<br>8106000000                             | 0.431<br>0.431<br>0.82<br>0.82<br>1                                                 | U.S. consumer stock releases                                                                                                                                 | (130–135)          |
| Cadmium   | Primary cadmium refinery production         | (136–141), production data for the United States are withheld by references to avoid disclosing company priority information | Cadmium recovery from end-of-life nickel-cadmium batteries. Production data are withheld by references to avoid disclosing company proprietary data. | (136–141)      | 2825907500<br>2830300000<br>2830902000<br>8107100000<br>8107200000<br>8107300000<br>8107900000                                           | 0.875<br>0.778<br>0.778<br>1<br>1<br>1<br>1                                         | 2830300000<br>2830902000<br>8107100000<br>8107200000<br>8107300000<br>8107900000               | 0.778<br>0.778<br>1<br>1<br>1<br>1                                                  | U.S. producer stock releases. Data for years 2011–2016 are not available                                                                                     | (136–141)          |
| Chromium  | None                                        | Not applicable                                                                                                               | Chromium content of stainless-steel scrap recycled                                                                                                   | (143–148)      | 2610000020<br>2610000040<br>2610000060<br>2819100000<br>2819900000<br>2833230000<br>2833294000                                           | 0.684<br>0.684<br>0.684<br>0.519<br>0.684<br>0.171<br>0.171                         | 2610000000<br>2819100000<br>2819900000<br>2833230000<br>2833294000<br>2841300000<br>2841400000 | 0.648<br>0.519<br>0.684<br>0.171<br>0.171<br>0.349<br>0.284                         | U.S. consumer stock releases as well as releases from U.S. National Defense Stockpile, all                                                                   | (143–148, 512–515) |

| Commodity       | U.S. primary production                                            |            | U.S. secondary production |                | U.S. imports                                                                                                                                                                                                   |                                                                                                       | U.S. exports                                                                                                               |                                                   | Stocks changes                                                                                                                                                               |                |
|-----------------|--------------------------------------------------------------------|------------|---------------------------|----------------|----------------------------------------------------------------------------------------------------------------------------------------------------------------------------------------------------------------|-------------------------------------------------------------------------------------------------------|----------------------------------------------------------------------------------------------------------------------------|---------------------------------------------------|------------------------------------------------------------------------------------------------------------------------------------------------------------------------------|----------------|
|                 | Description                                                        | References | Description               | References     | HTS codes                                                                                                                                                                                                      | Assumed content                                                                                       | HTS codes                                                                                                                  | Assumed content                                   | Description                                                                                                                                                                  | References     |
|                 |                                                                    |            |                           |                | 2841300000<br>2841400000<br>2841500000<br>2841501000<br>2849902000<br>7202410000<br>7202491000<br>7202495000<br>7202495010<br>7202495090<br>7202500000<br>8112206000<br>8112210000<br>8112220000<br>8112290000 | 0.349<br>0.284<br>0.093<br>0.284<br>0.867<br>1<br>1<br>1<br>1<br>1<br>1<br>1<br>1<br>1<br>1<br>1<br>1 | 2841500000<br>2841501000<br>7202410000<br>7202490000<br>7202500000<br>8112200000<br>8112210000<br>8112220000<br>8112290000 | 0.093<br>0.284<br>1<br>1<br>1<br>1<br>1<br>1<br>1 | forms, adjusted for chromium content                                                                                                                                         |                |
| Cobalt mine     | Cobalt byproduct mine production                                   | (150-155)  | Not applicable            | Not applicable | 2605000000                                                                                                                                                                                                     | 1                                                                                                     | 2605000000                                                                                                                 | 1                                                 | Because the United State did not refine any cobalt during the time period analysis (150-155), additions to stocks are assumed to equal the sum of production and net imports | Not applicable |
| Cobalt refinery | No U.S. primary refinery production during time period of analysis | (150-155)  | Secondary cobalt refinery | (117-123)      | 2822000000<br>2827340000<br>2827396000<br>2833291000<br>2836991000<br>2915230000<br>2915293000<br>8105106000<br>8105109000<br>8105203000<br>8105206000<br>8105209000                                           | 0.72<br>0.25<br>0.25<br>0.27<br>0.46<br>0.24<br>0.24<br>1<br>1<br>1<br>1<br>1                         | 2822000000<br>2827340000<br>2827396000<br>2915230000<br>2915293000<br>8105100000<br>8105200000                             | 0.72<br>0.25<br>0.25<br>0.24<br>0.24<br>1<br>1    | U.S. government stock releases, as well as releases from industry stocks and London Metal Exchange's U.S. warehouses                                                         | (150-155, 516) |
| Copper mine     | Copper concentrate, precipitates, and electrowon                   | (157-162)  | Not applicable            | Not applicable | 2603000010<br>2607000010<br>2608000010<br>2616100010<br>2616900010<br>2620196010<br>2620200010                                                                                                                 | 1<br>1<br>1<br>1<br>1<br>1<br>1                                                                       | 2603000010<br>2620300000                                                                                                   | 1<br>1                                            | Not available                                                                                                                                                                | Not applicable |

| Commodity       | U.S. primary production                                                                                                                                                                                                        |            | U.S. secondary production                                                                                                              |                    | U.S. imports                                                                                                                                           |                                                     | U.S. exports                                                                                   |                                 | Stocks changes                                                                                                                    |                |
|-----------------|--------------------------------------------------------------------------------------------------------------------------------------------------------------------------------------------------------------------------------|------------|----------------------------------------------------------------------------------------------------------------------------------------|--------------------|--------------------------------------------------------------------------------------------------------------------------------------------------------|-----------------------------------------------------|------------------------------------------------------------------------------------------------|---------------------------------|-----------------------------------------------------------------------------------------------------------------------------------|----------------|
|                 | Description                                                                                                                                                                                                                    | References | Description                                                                                                                            | References         | HTS codes                                                                                                                                              | Assumed content                                     | HTS codes                                                                                      | Assumed content                 | Description                                                                                                                       | References     |
|                 |                                                                                                                                                                                                                                |            |                                                                                                                                        |                    | 2620210010<br>2620290010<br>2620300010<br>2620906010<br>2620907010                                                                                     | 1<br>1<br>1<br>1<br>1                               |                                                                                                |                                 |                                                                                                                                   |                |
| Copper refinery | Copper electrolytic and electrowon refinery production                                                                                                                                                                         | (157-162)  | Copper recovered as refined copper and in alloys and other forms from copper-base scrap processed in the United States, old scrap only | (157-162, 517-519) | 7403110000<br>7403120000<br>7403130000<br>7403190000<br>7406100000<br>7406200000<br>7407101000<br>7407101500<br>7407103000<br>7407105010<br>7407105050 | 1<br>1<br>1<br>1<br>1<br>1<br>1<br>1<br>1<br>1<br>1 | 7403110000<br>7403120000<br>7403130000<br>7403190000<br>7406100000<br>7406200000<br>7407100000 | 1<br>1<br>1<br>1<br>1<br>1<br>1 | Stock releases of U.S. refineries wire-rod mills, brass mills, other industry, COMEX, and London Metal Exchange (U.S. warehouses) | (157-162, 517) |
| Copper smelter  | Copper primary smelter production                                                                                                                                                                                              | (157-162)  | There has been no smelter production from scrap in the United States since October 2001 (520)                                          | Not applicable     | 7401000000<br>7401100020<br>7401200000<br>7402000000                                                                                                   | 1<br>1<br>1<br>1                                    | 7401000010<br>7401000050<br>7401100000<br>7401200000<br>7402000000                             | 1<br>1<br>1<br>1<br>1           | U.S. stock releases of blister and in-process material                                                                            | (157-162, 517) |
| Feldspar        | Feldspar (including hand-cobbed feldspar, flotation-concentrate feldspar, feldspar in feldspar-quartz mixtures, and aplite) production. U.S. nepheline syenite not included because it was not considered marketable as a flux | (163-168)  | Not applicable                                                                                                                         | Not applicable     | 2529100000<br>2529300010<br>2529300050                                                                                                                 | Not applicable                                      | 2529100000<br>2529300000                                                                       | Not applicable                  | Not available                                                                                                                     | Not applicable |
| Gallium         | There was no primary gallium production in the United States during                                                                                                                                                            | (169)      | Aside from new scrap from gallium arsenide wafers (which are excluded), there is no information available                              | Not applicable     | 2851000010<br>2853000010<br>8112911000<br>8112921000                                                                                                   | 0.482<br>0.482<br>1<br>1                            | Not available                                                                                  | Not applicable                  | U.S. consumer stock releases, ( $\geq 99.99\%$ purity)                                                                            | (169, 521-528) |



| Commodity | U.S. primary production                                                                                                                                                                          |                    | U.S. secondary production                                                        |                                                                                                                                                   | U.S. imports                                                                                   |                                                                                                                                                      | U.S. exports                                         |                                                                                                    | Stocks changes                                                                             |                |
|-----------|--------------------------------------------------------------------------------------------------------------------------------------------------------------------------------------------------|--------------------|----------------------------------------------------------------------------------|---------------------------------------------------------------------------------------------------------------------------------------------------|------------------------------------------------------------------------------------------------|------------------------------------------------------------------------------------------------------------------------------------------------------|------------------------------------------------------|----------------------------------------------------------------------------------------------------|--------------------------------------------------------------------------------------------|----------------|
|           | Description                                                                                                                                                                                      | References         | Description                                                                      | References                                                                                                                                        | HTS codes                                                                                      | Assumed content                                                                                                                                      | HTS codes                                            | Assumed content                                                                                    | Description                                                                                | References     |
|           | the time period of analysis                                                                                                                                                                      |                    | on U.S. secondary production                                                     |                                                                                                                                                   |                                                                                                |                                                                                                                                                      |                                                      |                                                                                                    |                                                                                            |                |
| Germanium | Although there is germanium contained in zinc concentrates mined in the United States, no germanium is recovered from these concentrates in the United States (they are exported for processing) | Not applicable     | Germanium refining from old scrap sources only                                   | (117-123), for years 2012-2016, production data for the United States are withheld by references to avoid disclosing company priority information | 2825600000<br>8112303000<br>8112306000<br>8112309000<br>8112926000<br>8112926500<br>8112991000 | For this combined commodity code, germanium content is estimated based on unit value analysis and stoichiometric ratio<br>1<br>1<br>1<br>1<br>1<br>1 | 2825600000<br>8112300000<br>8112926100<br>8112991000 | Germanium content is estimated based on unit value analysis and stoichiometric ratio for all codes | U.S. government stock releases                                                             | (117-123, 198) |
| Graphite  | None                                                                                                                                                                                             | Not applicable     | Not available                                                                    | Not applicable                                                                                                                                    | 2504101000<br>2504105000<br>2504900000                                                         | 1<br>1<br>1                                                                                                                                          | 2504100000<br>2504900000                             | 1<br>1                                                                                             | Not available                                                                              | Not applicable |
| Helium    | Helium (both grade-A and crude) extracted from natural gas and withdrawn from storage (i.e., extracted from natural gas in prior years)                                                          | (117-123, 198-200) | Helium used in large-volume application are seldom recycled in the United States | (117-123)                                                                                                                                         | 2804290010                                                                                     | 1                                                                                                                                                    | 2804290010                                           | 1                                                                                                  | Releases from U.S. government storage are already included in the production figures       | Not applicable |
| Indium    | None                                                                                                                                                                                             | Not applicable     | None                                                                             | Not applicable                                                                                                                                    | 8112913000<br>8112923000                                                                       | 1<br>1                                                                                                                                               | Not available                                        | Not applicable                                                                                     | Not available                                                                              | Not applicable |
| Iridium   | Assumed to be negligible                                                                                                                                                                         | Not applicable     | Non-toll refined production assumed to be negligible                             | Not applicable                                                                                                                                    | 7110410010<br>7110490010<br>7110410050                                                         | 1<br>1<br>For this combined commodity code, iridium content is estimated based on unit value analysis                                                | 7110410000<br>7110490000                             | For these combined commodity codes, iridium content is estimated based on unit value analysis      | U.S. government stock releases. Reliable data on industry stock releases is not available. | (401-406, 529) |

| Commodity         | U.S. primary production                               |                                                                                                                              | U.S. secondary production               |                    | U.S. imports                                                                                                                                                         |                                                                                      | U.S. exports                                                                                                                                                         |                                                                                      | Stocks changes                                                                                                                                               |                |
|-------------------|-------------------------------------------------------|------------------------------------------------------------------------------------------------------------------------------|-----------------------------------------|--------------------|----------------------------------------------------------------------------------------------------------------------------------------------------------------------|--------------------------------------------------------------------------------------|----------------------------------------------------------------------------------------------------------------------------------------------------------------------|--------------------------------------------------------------------------------------|--------------------------------------------------------------------------------------------------------------------------------------------------------------|----------------|
|                   | Description                                           | References                                                                                                                   | Description                             | References         | HTS codes                                                                                                                                                            | Assumed content                                                                      | HTS codes                                                                                                                                                            | Assumed content                                                                      | Description                                                                                                                                                  | References     |
| Iron ore          | Iron ore mine production                              | (231–236)                                                                                                                    | Not applicable                          | Not applicable     | 2601110030<br>2601110060<br>2601110090<br>2601120030<br>2601120060<br>2601120090<br>2601200000                                                                       | 0.62<br>0.58<br>0.6<br>0.63<br>0.65<br>0.62<br>0.62                                  | 2601110030<br>2601110060<br>2601110090<br>2601120030<br>2601120060<br>2601120090<br>2601200000                                                                       | 0.62<br>0.58<br>0.6<br>0.63<br>0.65<br>0.62<br>0.62                                  | U.S. industry stock releases from stocks at mines, plants, and loading docks                                                                                 | (231–236, 530) |
| Lead mine         | Lead mine production                                  | (251–256)                                                                                                                    | Not applicable                          | Not applicable     | 2603000020<br>2607000020<br>2608000020<br>2616100020<br>2616900020<br>2620196020<br>2620200020<br>2620210020<br>2620290020<br>2620300020<br>2620906020<br>2620907020 | 1<br>1<br>1<br>1<br>1<br>1<br>1<br>1<br>1<br>1<br>1<br>1                             | 2607000020<br>2620200000<br>2620290000                                                                                                                               | 1<br>1<br>1                                                                          | Not available. However, given that the last primary smelter closed in yearend 2013, additions to stocks are assumed to equal net imports for years 2014-2016 | Not applicable |
| Lead refinery     | Primary lead refinery, domestic ores and base bullion | (251–256)                                                                                                                    | Secondary lead refinery, old scrap only | (251–256)          | 2824100000<br>2824200000<br>2824901000<br>2824902000<br>2824905000<br>2836700000<br>2836994000<br>7801100000<br>7801910000<br>7801993000<br>7801999050<br>7804200000 | 0.928<br>0.907<br>0.928<br>0.907<br>0.928<br>0.775<br>0.775<br>1<br>1<br>1<br>1<br>1 | 2824100000<br>2824200000<br>2824900000<br>2824902000<br>2824909000<br>2836700000<br>2836994000<br>7801100000<br>7801910000<br>7801993000<br>7801999050<br>7804200000 | 0.928<br>0.907<br>0.928<br>0.907<br>0.928<br>0.775<br>0.775<br>1<br>1<br>1<br>1<br>1 | U.S. stock releases by consumers and secondary smelters                                                                                                      | (251–256, 531) |
| Lithium           | Lithium production                                    | (268–273), production data for the United States are withheld by references to avoid disclosing company priority information | Not applicable                          | Not applicable     | 2825200000<br>2836910010<br>2836910050                                                                                                                               | 0.165<br>0.188<br>0.188                                                              | 2825200000<br>2836910010<br>2836910050                                                                                                                               | 0.165<br>0.188<br>0.188                                                              | Not available                                                                                                                                                | Not applicable |
| Magnesium (metal) | Primary magnesium                                     | (275–280), production                                                                                                        | Magnesium recovered from magnesium-     | (275–280, 532–534) | 8104110000<br>8104190000                                                                                                                                             | 1<br>1                                                                               | 8104110000<br>8104190000                                                                                                                                             | 1<br>1                                                                               | Not available                                                                                                                                                | Not applicable |

| Commodity  | U.S. primary production                                                               |                                                                                                        | U.S. secondary production                                                                                              |                | U.S. imports                                                                                                                                                                                                                                                                                                     |                                                                                                                                                    | U.S. exports                                                                                                                                           |                                                                                            | Stocks changes                                                                                                                              |                |
|------------|---------------------------------------------------------------------------------------|--------------------------------------------------------------------------------------------------------|------------------------------------------------------------------------------------------------------------------------|----------------|------------------------------------------------------------------------------------------------------------------------------------------------------------------------------------------------------------------------------------------------------------------------------------------------------------------|----------------------------------------------------------------------------------------------------------------------------------------------------|--------------------------------------------------------------------------------------------------------------------------------------------------------|--------------------------------------------------------------------------------------------|---------------------------------------------------------------------------------------------------------------------------------------------|----------------|
|            | Description                                                                           | References                                                                                             | Description                                                                                                            | References     | HTS codes                                                                                                                                                                                                                                                                                                        | Assumed content                                                                                                                                    | HTS codes                                                                                                                                              | Assumed content                                                                            | Description                                                                                                                                 | References     |
|            | metal production                                                                      | data for the United States are withheld by references to avoid disclosing company priority information | based and aluminum-based old scrap alloys                                                                              |                | 8104200000<br>8104300000<br>8104900000                                                                                                                                                                                                                                                                           | 1<br>1<br>1                                                                                                                                        | 8104200000<br>8104300000<br>8104900000                                                                                                                 | 1<br>1<br>1                                                                                |                                                                                                                                             |                |
| Manganese  | None                                                                                  | Not applicable                                                                                         | Not available                                                                                                          | Not applicable | 2602000040<br>2602000060<br>2820100000<br>2820900000<br>2841600010<br>2841600050<br>2841610000<br>2841690000<br>2841690010<br>2841690090<br>7202111000<br>7202115000<br>7202191000<br>7202195000<br>7202300000<br>8111003000<br>8111004500<br>8111004700<br>8111004900<br>8111004910<br>8111004990<br>8111006000 | 1<br>1<br>0.6<br>0.775<br>0.348<br>0.462<br>0.348<br>0.462<br>0.333<br>0.462<br>1<br>1<br>1<br>1<br>1<br>1<br>1<br>1<br>1<br>1<br>1<br>1<br>1<br>1 | 2602000000<br>2820100000<br>2820900000<br>2841600000<br>2841610000<br>2841690000<br>2841690010<br>2841690090<br>7202110000<br>7202190000<br>8111000000 | 0.5<br>0.6<br>0.775<br>0.462<br>0.348<br>0.462<br>0.333<br>0.462<br>0.79<br>0.79<br>1<br>1 | Government, producer and consumer stock releases of manganese ore, ferromanganese, and silicomanganese (all converted to manganese content) | (117-123, 198) |
| Mica       | Scrap and flake mica production, but excludes any low-quality sericite and sheet mica | (364-369)                                                                                              | Not applicable                                                                                                         | Not applicable | 2525100010<br>2525100020<br>2525100050<br>2525200000<br>2525300000<br>6814100000<br>6814900000                                                                                                                                                                                                                   | 1<br>1<br>1<br>1<br>1<br>1<br>1                                                                                                                    | 2525100000<br>2525200000<br>2525300000<br>6814100000<br>6814900000                                                                                     | 1<br>1<br>1<br>1<br>1                                                                      | U.S. industry stock releases of mica splittings                                                                                             | (364-369)      |
| Molybdenum | Molybdenum mine production and recovery as a byproduct of copper mining               | (382-387)                                                                                              | Molybdenum is recycled as "a component of catalysts, ferrous scrap, and superalloy scarp." (117) No specific data are, | Not applicable | 2613100000<br>2613900000<br>2825700000<br>2841701000<br>2841705000<br>3823903400<br>3824903400                                                                                                                                                                                                                   | 1<br>1<br>0.666<br>1<br>1<br>1<br>1                                                                                                                | 2613100000<br>2613900000<br>2825700000<br>2841700000<br>7202700000<br>8102100000<br>8102910000                                                         | 1<br>1<br>0.666<br>1<br>1<br>1<br>1                                                        | Stock releases of U.S. consumers, product producers, and concentrate at mines and                                                           | (382-387)      |

| Commodity    | U.S. primary production                                                                                                                                                      |                          | U.S. secondary production                                                          |                | U.S. imports                                                                                                                                                         |                                                                              | U.S. exports                                                                                                                                           |                                                                              | Stocks changes                                                                                                                                                                                                                                              |                    |
|--------------|------------------------------------------------------------------------------------------------------------------------------------------------------------------------------|--------------------------|------------------------------------------------------------------------------------|----------------|----------------------------------------------------------------------------------------------------------------------------------------------------------------------|------------------------------------------------------------------------------|--------------------------------------------------------------------------------------------------------------------------------------------------------|------------------------------------------------------------------------------|-------------------------------------------------------------------------------------------------------------------------------------------------------------------------------------------------------------------------------------------------------------|--------------------|
|              | Description                                                                                                                                                                  | References               | Description                                                                        | References     | HTS codes                                                                                                                                                            | Assumed content                                                              | HTS codes                                                                                                                                              | Assumed content                                                              | Description                                                                                                                                                                                                                                                 | References         |
|              |                                                                                                                                                                              |                          | however, available. Secondary production is therefore excluded from this analysis. |                | 3824993400<br>7202700000<br>8102100000<br>8102911000<br>8102915000<br>8102920000<br>8102923000<br>8102926000<br>8102940000<br>8102953000<br>8102956000<br>8102970000 | 1<br>1<br>1<br>1<br>1<br>1<br>1<br>1<br>1<br>1<br>1<br>1                     | 8102920000<br>8102940000<br>8102950000<br>8102970000                                                                                                   | 1<br>1<br>1<br>1                                                             | plants, where available, as reported by the references                                                                                                                                                                                                      |                    |
| Nickel mine  | Nickel concentrate from Eagle mine in Michigan since 2014 and production as a byproduct from Stillwater operations in Montana                                                | (118-123, 198, 433, 535) | Not applicable                                                                     | Not applicable | 2604000040<br>2620903000<br>2620993000                                                                                                                               | 1<br>1<br>1                                                                  | 2604000040                                                                                                                                             | 1                                                                            | Information on U.S. stock releases was not available. Because all of Eagle mine's nickel production was exported, stock releases were set equal the sum of net imports and production less any production from Stillwater, which was processed domestically | Not applicable     |
| Nickel plant | Minor quantities are produced from byproduct at Stillwater's base metal refinery in Columbus, Montana. All nickel production from the Eagle mine was exported for processing | (433, 535)               | Secondary recovery from ferrous and nonferrous scrap (reported in nickel content)  | (118-123, 198) | 2825400000<br>2827350000<br>2833240000<br>3815110000<br>7202600000<br>7501100000<br>7501200000<br>7502100000<br>7503000000<br>7504000010<br>7504000050               | 0.65<br>0.25<br>0.22<br>0.22<br>1<br>0.22<br>0.77<br>1<br>1<br>0.5<br>1<br>1 | 2825400000<br>2827350000<br>2833240000<br>3815110000<br>7202600000<br>7501100000<br>7501200000<br>7502100000<br>7503000000<br>7504000010<br>7504000050 | 0.65<br>0.25<br>0.22<br>0.22<br>1<br>0.22<br>0.77<br>1<br>1<br>0.5<br>1<br>1 | Stock releases of U.S. consumers and products, nickel (all forms)                                                                                                                                                                                           | (118-123, 198)     |
| Niobium      | There has not been any                                                                                                                                                       | (117)                    | Not available                                                                      | Not applicable | 2615903000<br>2615906030                                                                                                                                             | 0.112<br>0.209                                                               | 2615903000<br>2615906030                                                                                                                               | 0.112<br>0.209                                                               | U.S. consumer and U.S.                                                                                                                                                                                                                                      | (395-400, 536-539) |

| Commodity | U.S. primary production                                                                                                                               |            | U.S. secondary production                                                                                                                                                                                                                                                                                                                                                                                                                       |            | U.S. imports                                                                                                 |                                                         | U.S. exports                                                                                   |                                 | Stocks changes                                                                              |                |
|-----------|-------------------------------------------------------------------------------------------------------------------------------------------------------|------------|-------------------------------------------------------------------------------------------------------------------------------------------------------------------------------------------------------------------------------------------------------------------------------------------------------------------------------------------------------------------------------------------------------------------------------------------------|------------|--------------------------------------------------------------------------------------------------------------|---------------------------------------------------------|------------------------------------------------------------------------------------------------|---------------------------------|---------------------------------------------------------------------------------------------|----------------|
|           | Description                                                                                                                                           | References | Description                                                                                                                                                                                                                                                                                                                                                                                                                                     | References | HTS codes                                                                                                    | Assumed content                                         | HTS codes                                                                                      | Assumed content                 | Description                                                                                 | References     |
|           | significant niobium mine production reported since 1959                                                                                               |            |                                                                                                                                                                                                                                                                                                                                                                                                                                                 |            | 2825901500<br>7202930000<br>7202930010<br>7202930090<br>7202934000<br>7202938000<br>8112914000<br>8112924000 | 0.699<br>0.65<br>0.65<br>0.65<br>0.65<br>0.65<br>1<br>1 | 7202930000                                                                                     | 0.65                            | government stock releases                                                                   |                |
| Palladium | Stillwater and East Boulder mine production. The minor quantities of palladium recovered from Eagle mine in Michigan are excluded due to lack of data | (433, 535) | Palladium content of hypothetically available catalytic converter scrap from obsolete vehicles in the United States are multiplied by the ratio of the palladium content of world catalytic converter scrap refined to theoretically available world catalytic converter scrap using data from reference. Recycling from obsolete jewelry and electronics in the United States is assumed negligible. Analysis excludes toll-refined palladium. | (407)      | 7110210000<br>7110290000                                                                                     | 1<br>1                                                  | 7110210000<br>7110290000                                                                       | 1<br>1                          | Not available, assumed to be negligible                                                     | Not applicable |
| Phosphate | Phosphate rock mine production                                                                                                                        | (408-413)  | None                                                                                                                                                                                                                                                                                                                                                                                                                                            | None       | 2510100000<br>2510200000                                                                                     | 0.2<br>0.2                                              | 2510100000<br>2510200000                                                                       | 0.2<br>0.2                      | U.S. producer stock releases                                                                | (117-123, 198) |
| Platinum  | Stillwater and East Boulder mine production. The minor quantities of platinum recovered from Eagle mine in Michigan are excluded due to lack of data  | (433, 535) | Platinum content of hypothetically available catalytic converter scrap from obsolete vehicles in the United States are multiplied by the ratio of the platinum content of world catalytic converter scrap refined to theoretically available world                                                                                                                                                                                              | (407)      | 7110110000<br>7110110010<br>7110110020<br>7110110050<br>7110190000<br>7115100000<br>7118900020               | 1<br>1<br>1<br>1<br>1<br>1<br>1                         | 7110110000<br>7110110010<br>7110110020<br>7110110050<br>7110190000<br>7115100000<br>7118900020 | 1<br>1<br>1<br>1<br>1<br>1<br>1 | U.S. government stock releases. Reliable data on industry stock releases are not available. | (401-406, 529) |

| Commodity | U.S. primary production                             |                | U.S. secondary production                                                                                                                                                                                                                                                                                                                     |                | U.S. imports                                                       |                                                                                          | U.S. exports                                                       |                                                                                                 | Stocks changes                          |                |
|-----------|-----------------------------------------------------|----------------|-----------------------------------------------------------------------------------------------------------------------------------------------------------------------------------------------------------------------------------------------------------------------------------------------------------------------------------------------|----------------|--------------------------------------------------------------------|------------------------------------------------------------------------------------------|--------------------------------------------------------------------|-------------------------------------------------------------------------------------------------|-----------------------------------------|----------------|
|           | Description                                         | References     | Description                                                                                                                                                                                                                                                                                                                                   | References     | HTS codes                                                          | Assumed content                                                                          | HTS codes                                                          | Assumed content                                                                                 | Description                             | References     |
|           |                                                     |                | catalytic converter scrap using data from reference. Recycling from obsolete jewelry and electronics in the United States is assumed negligible. Analysis excludes toll-refined platinum.                                                                                                                                                     |                |                                                                    |                                                                                          |                                                                    |                                                                                                 |                                         |                |
| Potash    | Marketable potash production                        | (414-419)      | None                                                                                                                                                                                                                                                                                                                                          | Not applicable | 2834210000<br>3104200000<br>3104300000<br>3104900000<br>3104900100 | 0.39<br>0.52<br>0.45<br>0.12<br>0.12                                                     | 2834210000<br>3104200000<br>3104300000<br>3104900000<br>3104900100 | 0.39<br>0.52<br>0.45<br>0.12<br>0.12                                                            | Not available                           | Not applicable |
| Rhenium   | Primary rhenium recovery                            | (420-425)      | Not available                                                                                                                                                                                                                                                                                                                                 | Not applicable | 2841902000<br>8112915000<br>8112925000                             | 0.694<br>1<br>1                                                                          | Not available                                                      | Not applicable                                                                                  | Not available                           | Not applicable |
| Rhodium   | Stillwater and East Boulder rhodium mine production | (433, 535)     | Rhodium content of hypothetically available catalytic converter scrap from obsolete vehicles in the United States are multiplied by the ratio of the rhodium content of world catalytic converter scrap refined to theoretically available world catalytic converter scrap using data from reference. Analysis excludes toll-refined rhodium. | (407)          | 7110310000<br>7110390000                                           | 1<br>1                                                                                   | 7110310000<br>7110390000                                           | 1<br>1                                                                                          | Not available, assumed to be negligible | Not applicable |
| Ruthenium | Not data available; assumed to be negligible        | Not applicable | Non-toll refined production assumed to be negligible                                                                                                                                                                                                                                                                                          | Not applicable | 7110410030<br>7110490050<br>7110410050                             | 1<br>1<br>For this combined commodity code, ruthenium content is estimated based on unit | 7110410000<br>7110490000                                           | For these combined commodity codes, ruthenium content is estimated based on unit value analysis | Not available, assumed to be negligible | Not applicable |



| Commodity      | U.S. primary production         |                                                                                                                                       | U.S. secondary production                                                                                                                                                |                    | U.S. imports                                                                                                                                                                                                   |                                                                                          | U.S. exports                                                                                                                                                                       |                                                                                          | Stocks changes                                                                                                           |                |
|----------------|---------------------------------|---------------------------------------------------------------------------------------------------------------------------------------|--------------------------------------------------------------------------------------------------------------------------------------------------------------------------|--------------------|----------------------------------------------------------------------------------------------------------------------------------------------------------------------------------------------------------------|------------------------------------------------------------------------------------------|------------------------------------------------------------------------------------------------------------------------------------------------------------------------------------|------------------------------------------------------------------------------------------|--------------------------------------------------------------------------------------------------------------------------|----------------|
|                | Description                     | References                                                                                                                            | Description                                                                                                                                                              | References         | HTS codes                                                                                                                                                                                                      | Assumed content                                                                          | HTS codes                                                                                                                                                                          | Assumed content                                                                          | Description                                                                                                              | References     |
|                | in the United States since 1959 |                                                                                                                                       |                                                                                                                                                                          |                    | 8103200030<br>8103200090<br>8103300000<br>8103900000                                                                                                                                                           | 1<br>1<br>1<br>1                                                                         | 8103200030<br>8103200090<br>8103300000<br>8103900000                                                                                                                               | 1<br>1<br>1<br>1                                                                         | available for industry stock releases                                                                                    |                |
| Tellurium      | Primary tellurium production    | (117-123), production data for the United States are withheld by references to avoid disclosing company priority information          | Not available, but recovery from old scrap is assumed to be very small                                                                                                   | Not applicable     | 2804500020                                                                                                                                                                                                     | Tellurium imports are calculated on the basis of monetary value instead of mass quantity | 2804500020                                                                                                                                                                         | Tellurium exports are calculated on the basis of monetary value instead of mass quantity | Not available                                                                                                            | Not applicable |
| Tin mine       | None                            | Not applicable                                                                                                                        | Not applicable                                                                                                                                                           | Not applicable     | 2609000000                                                                                                                                                                                                     | 1                                                                                        | 2609000000                                                                                                                                                                         | 1                                                                                        | Given that there has been no U.S. primary tin smelting since 1989, (117-123) stock releases are set to equal net exports | (75)           |
| Tin smelter    | None                            | (462-467)                                                                                                                             | Secondary tin smelter production, old scrap only                                                                                                                         | (462-467)          | 2825902000<br>2827370000<br>2827392500<br>2841903000<br>8001100000<br>8005002000<br>8005200000<br>8007003200                                                                                                   | 0.788<br>0.626<br>0.626<br>0.485<br>1<br>1<br>1<br>1                                     | 2827370000<br>2827392500<br>8001100000<br>8005002000<br>8005200000<br>8007003200                                                                                                   | 0.626<br>0.626<br>1<br>1<br>1<br>1                                                       | U.S. government stockpile releases and U.S. consumer and deal stocks releases                                            | (117-123, 198) |
| Titanium metal | Titanium metal production       | (117-123, 198-200), production data for the United States are withheld by references to avoid disclosing company priority information | The majority of titanium metal recycled is new scrap (i.e., revert). Specific old scrap statistics are generally not available and are thus excluded from this analysis. | (117-123, 198-200) | 7202910000<br>8108105010<br>8108105015<br>8108105030<br>8108105045<br>8108105060<br>8108105090<br>8108200010<br>8108200015<br>8108200030<br>8108200045<br>8108200060<br>8108200090<br>8108200095<br>8108300000 | 0.7<br>1<br>1<br>1<br>1<br>1<br>1<br>1<br>1<br>1<br>1<br>1<br>1<br>1<br>1<br>1           | 7202910000<br>8108105010<br>8108105030<br>8108105045<br>8108105060<br>8108105075<br>8108200010<br>8108200030<br>8108200045<br>8108200060<br>8108200090<br>8108200095<br>8108300000 | 0.7<br>1<br>1<br>1<br>1<br>1<br>1<br>1<br>1<br>1<br>1<br>1<br>1<br>1<br>1<br>0.85        | U.S. industry stock releases                                                                                             | (117-123, 198) |



| Commodity                    | U.S. primary production                                                    |                | U.S. secondary production                                                       |                                                                                                                                                      | U.S. imports                                                                                                                                                                                                                                                                                                                                 |                                                                                                                                                     | U.S. exports                                                                                                                                                         |                                                                            | Stocks changes                                                                                                                                                                                                                                                                                                                                                      |                |
|------------------------------|----------------------------------------------------------------------------|----------------|---------------------------------------------------------------------------------|------------------------------------------------------------------------------------------------------------------------------------------------------|----------------------------------------------------------------------------------------------------------------------------------------------------------------------------------------------------------------------------------------------------------------------------------------------------------------------------------------------|-----------------------------------------------------------------------------------------------------------------------------------------------------|----------------------------------------------------------------------------------------------------------------------------------------------------------------------|----------------------------------------------------------------------------|---------------------------------------------------------------------------------------------------------------------------------------------------------------------------------------------------------------------------------------------------------------------------------------------------------------------------------------------------------------------|----------------|
|                              | Description                                                                | References     | Description                                                                     | References                                                                                                                                           | HTS codes                                                                                                                                                                                                                                                                                                                                    | Assumed content                                                                                                                                     | HTS codes                                                                                                                                                            | Assumed content                                                            | Description                                                                                                                                                                                                                                                                                                                                                         | References     |
|                              |                                                                            |                |                                                                                 |                                                                                                                                                      | 8108200091<br>8108200095<br>8108300000<br>8108906010<br>8108906020                                                                                                                                                                                                                                                                           | 1<br>1<br>0.85<br>1<br>1                                                                                                                            | 8108906010<br>8108906020                                                                                                                                             | 1<br>1                                                                     |                                                                                                                                                                                                                                                                                                                                                                     |                |
| Titanium mineral concentrate | Titanium mineral production                                                | (468-473)      | Not applicable                                                                  | Not applicable                                                                                                                                       | 2614003000<br>2614006020<br>2823000000<br>2614006040                                                                                                                                                                                                                                                                                         | 0.9<br>0.6<br>0.599<br>0.9                                                                                                                          | 2614000000<br>2823000000                                                                                                                                             | 0.6<br>0.599                                                               | Not available                                                                                                                                                                                                                                                                                                                                                       | Not applicable |
| Tungsten                     | Not available, assumed to be negligible                                    | (117-123, 198) | Secondary tungsten production                                                   | (117-123, 198), for certain years, production data for the United States are withheld by references to avoid disclosing company priority information | 2611000000<br>2611003000<br>2611006000<br>2620902000<br>2620992000<br>2825903000<br>2827394000<br>2841800010<br>2841800020<br>2841800050<br>2849903000<br>2850001000<br>3823903500<br>3824903500<br>3824993500<br>7202800000<br>8101100000<br>8101911000<br>8101915000<br>8101920000<br>8101940000<br>8101950000<br>8101970000<br>8101991000 | 1<br>1<br>1<br>1<br>1<br>0.793<br>0.464<br>1<br>1<br>1<br>0.939<br>0.929<br>1<br>1<br>1<br>1<br>1<br>0.95<br>0.95<br>0.95<br>0.95<br>1<br>1<br>0.95 | 2611000000<br>2841800010<br>2841800040<br>2849903000<br>7202800000<br>8101100000<br>8101910000<br>8101920000<br>8101940000<br>8101950000<br>8101970000<br>8101991000 | 1<br>1<br>1<br>0.939<br>1<br>1<br>0.7<br>0.95<br>0.95<br>0.95<br>1<br>0.95 | U.S. government stock releases of tungsten ores and concentrates, and tungsten metal powder<br><br>Producer stock releases including tungsten metal powder and tungsten carbide powder<br><br>Consumer stock releases including ammonium paratungstate, other tungsten chemicals, ferrotungsten, tungsten metal powder, tungsten carbide powder, and tungsten scrap | (474-479, 540) |
| Vanadium                     | Vanadium recovery as a co-product from uraniumiferous sandstone operations | (482-487)      | Vanadium recovered from spent catalysts, petroleum residues, and combustion ash | (488)                                                                                                                                                | 2615906090<br>2620400030<br>2620500000<br>2620907520<br>2620908020<br>2620991000<br>2620997520<br>2825300010                                                                                                                                                                                                                                 | 0.56<br>0.56<br>1<br>1<br>1<br>0.56<br>0.56<br>1                                                                                                    | 2615906090<br>2620500000<br>2620991000<br>2825300010<br>2825300050<br>7202920000<br>8112927000                                                                       | 1<br>1<br>1<br>1<br>1<br>1<br>0.56                                         | U.S. industry stock releases of vanadium contained in vanadium oxide, vanadium-aluminum alloy, ferrovanadium,                                                                                                                                                                                                                                                       | (482-487, 541) |

| Commodity    | U.S. primary production                  |            | U.S. secondary production                  |                | U.S. imports                                                                                                                                                                                                                                                                                       |                                                                                                                                                      | U.S. exports                                                                                                                                                                                                                 |                                                                                                                           | Stocks changes                                                                        |                |
|--------------|------------------------------------------|------------|--------------------------------------------|----------------|----------------------------------------------------------------------------------------------------------------------------------------------------------------------------------------------------------------------------------------------------------------------------------------------------|------------------------------------------------------------------------------------------------------------------------------------------------------|------------------------------------------------------------------------------------------------------------------------------------------------------------------------------------------------------------------------------|---------------------------------------------------------------------------------------------------------------------------|---------------------------------------------------------------------------------------|----------------|
|              | Description                              | References | Description                                | References     | HTS codes                                                                                                                                                                                                                                                                                          | Assumed content                                                                                                                                      | HTS codes                                                                                                                                                                                                                    | Assumed content                                                                                                           | Description                                                                           | References     |
|              |                                          |            |                                            |                | 2825300050<br>2827391000<br>2827491000<br>2833293000<br>2841901000<br>2850002000<br>3823903600<br>3824903600<br>3824993600<br>7202920000<br>8112406000<br>8112927000                                                                                                                               | 1<br>1<br>1<br>1<br>1<br>1<br>1<br>1<br>1<br>1<br>1<br>1                                                                                             |                                                                                                                                                                                                                              |                                                                                                                           | vanadium metal, ammonium metavanadate, and other vanadium alloys                      |                |
| Zinc mine    | Production of U.S.                       | (489-494)  | Not applicable                             | Not applicable | 2603000030<br>2607000030<br>2608000030<br>2616100030<br>2616900030<br>2620110000<br>2620193000<br>2620196030<br>2620200030<br>2620210030<br>2620300030<br>2620906030<br>2620907030                                                                                                                 | 1<br>1<br>1<br>1<br>1<br>1<br>1<br>1<br>1<br>1<br>1<br>1<br>1                                                                                        | 2608000030<br>2620110000<br>2620190000                                                                                                                                                                                       | 1<br>1<br>1                                                                                                               | Not available, assumed to be negligible                                               | Not applicable |
| Zinc smelter | Production of primary U.S. zinc smelters | (489-494)  | Production of secondary U.S. zinc smelters | (489-494)      | 2817000000<br>2827360000<br>2827396500<br>2830200000<br>2830201000<br>2830202000<br>2830901000<br>2830901500<br>2833260000<br>2833294500<br>3206200030<br>3206420000<br>7901110000<br>7901120000<br>7901121000<br>7901125000<br>7902000000<br>7903100000<br>7903903000<br>7903906000<br>7902000000 | 0.803<br>0.479<br>0.479<br>0.671<br>0.671<br>0.671<br>0.671<br>0.671<br>0.405<br>0.405<br>0.36<br>0.198<br>1<br>1<br>1<br>1<br>1<br>1<br>1<br>1<br>1 | 2817000000<br>2827360000<br>2827396500<br>2830200000<br>2830201000<br>2830202000<br>2830901000<br>2830901500<br>2833260000<br>2833294500<br>3206420000<br>7901110000<br>7901120000<br>7902000000<br>7903100000<br>7903900000 | 0.803<br>0.479<br>0.479<br>0.671<br>0.671<br>0.671<br>0.671<br>1<br>0.405<br>0.405<br>0.198<br>1<br>1<br>1<br>1<br>1<br>1 | Producer and consumer refined zinc stock releases; U.S. government stockpile releases | (489-494, 542) |

| Commodity | U.S. primary production                      |                                                                                                                                              | U.S. secondary production |                | U.S. imports                                                                     |                                                                                                                                                        | U.S. exports                                                                     |                                                                                                                                                        | Stocks changes |               |
|-----------|----------------------------------------------|----------------------------------------------------------------------------------------------------------------------------------------------|---------------------------|----------------|----------------------------------------------------------------------------------|--------------------------------------------------------------------------------------------------------------------------------------------------------|----------------------------------------------------------------------------------|--------------------------------------------------------------------------------------------------------------------------------------------------------|----------------|---------------|
|           | Description                                  | References                                                                                                                                   | Description               | References     | HTS codes                                                                        | Assumed content                                                                                                                                        | HTS codes                                                                        | Assumed content                                                                                                                                        | Description    | References    |
| Zirconium | Production of zirconium mineral concentrates | (495-500), for year years, production data for the United States are withheld by references to avoid disclosing company priority information | Not available             | Not applicable | 2615100000<br>7202991000<br>8109200000<br>8109300000<br>8109900000<br>2825600000 | 0.498<br>0.62<br>1<br>1<br>1<br>For this combined commodity code, zirconium content is estimated based on unit value analysis and stoichiometric ratio | 2615100000<br>7202991000<br>8109200000<br>8109300000<br>8109900000<br>2825600000 | 0.498<br>0.62<br>1<br>1<br>1<br>For this combined commodity code, zirconium content is estimated based on unit value analysis and stoichiometric ratio | Not available  | Not available |







| HTS code   | Al       | C        | Cr       | Cu       | Fe       | Mg | Mn       | Mo       | N        | Nb       | Ni       | P        | S        | Si       | Ta | Ti       | V        | Zr       |
|------------|----------|----------|----------|----------|----------|----|----------|----------|----------|----------|----------|----------|----------|----------|----|----------|----------|----------|
| 722200041  | 6.27E-04 | 5.25E-05 | 1.68E-01 | 2.07E-03 | 7.63E-01 |    | 1.74E-02 | 7.16E-03 | 2.52E-04 | 1.79E-04 | 2.84E-02 | 4.22E-04 | 7.20E-04 | 9.41E-03 |    | 9.42E-05 |          |          |
| 722200043  |          | 5.82E-05 | 1.92E-01 | 4.27E-04 | 6.25E-01 |    | 2.02E-02 | 2.07E-02 | 4.20E-04 | 4.79E-04 | 1.28E-01 | 5.45E-04 | 4.10E-04 | 1.08E-02 |    | 3.11E-04 |          |          |
| 722200062  | 6.27E-04 | 5.25E-05 | 1.68E-01 | 2.07E-03 | 7.63E-01 |    | 1.74E-02 | 7.16E-03 | 2.52E-04 | 1.79E-04 | 2.84E-02 | 4.22E-04 | 7.20E-04 | 9.41E-03 |    | 9.42E-05 |          |          |
| 722200064  |          | 5.82E-05 | 1.92E-01 | 4.27E-04 | 6.25E-01 |    | 2.02E-02 | 2.07E-02 | 4.20E-04 | 4.79E-04 | 1.28E-01 | 5.45E-04 | 4.10E-04 | 1.08E-02 |    | 3.11E-04 |          |          |
| 722200067  | 6.27E-04 | 5.25E-05 | 1.68E-01 | 2.07E-03 | 7.63E-01 |    | 1.74E-02 | 7.16E-03 | 2.52E-04 | 1.79E-04 | 2.84E-02 | 4.22E-04 | 7.20E-04 | 9.41E-03 |    | 9.42E-05 |          |          |
| 722200069  |          | 5.82E-05 | 1.92E-01 | 4.27E-04 | 6.25E-01 |    | 2.02E-02 | 2.07E-02 | 4.20E-04 | 4.79E-04 | 1.28E-01 | 5.45E-04 | 4.10E-04 | 1.08E-02 |    | 3.11E-04 |          |          |
| 722200071  | 6.27E-04 | 5.25E-05 | 1.68E-01 | 2.07E-03 | 7.63E-01 |    | 1.74E-02 | 7.16E-03 | 2.52E-04 | 1.79E-04 | 2.84E-02 | 4.22E-04 | 7.20E-04 | 9.41E-03 |    | 9.42E-05 |          |          |
| 722200073  |          | 5.82E-05 | 1.92E-01 | 4.27E-04 | 6.25E-01 |    | 2.02E-02 | 2.07E-02 | 4.20E-04 | 4.79E-04 | 1.28E-01 | 5.45E-04 | 4.10E-04 | 1.08E-02 |    | 3.11E-04 |          |          |
| 7222300012 | 2.40E-04 | 2.09E-01 | 9.93E-03 | 4.47E-01 | 2.00E-02 |    | 5.20E-02 | 1.04E-03 |          |          | 2.51E-01 | 5.45E-04 | 2.70E-04 | 9.40E-03 |    |          |          |          |
| 7222300022 | 6.27E-04 | 5.25E-05 | 1.68E-01 | 2.07E-03 | 7.63E-01 |    | 1.74E-02 | 7.16E-03 | 2.52E-04 | 1.79E-04 | 2.84E-02 | 4.22E-04 | 7.20E-04 | 9.41E-03 |    | 9.42E-05 |          |          |
| 7222300024 |          | 5.82E-05 | 1.92E-01 | 4.27E-04 | 6.25E-01 |    | 2.02E-02 | 2.07E-02 | 4.20E-04 | 4.79E-04 | 1.28E-01 | 5.45E-04 | 4.10E-04 | 1.08E-02 |    | 3.11E-04 |          |          |
| 7222300082 | 6.27E-04 | 5.25E-05 | 1.68E-01 | 2.07E-03 | 7.63E-01 |    | 1.74E-02 | 7.16E-03 | 2.52E-04 | 1.79E-04 | 2.84E-02 | 4.22E-04 | 7.20E-04 | 9.41E-03 |    | 9.42E-05 |          |          |
| 7222300084 |          | 5.82E-05 | 1.92E-01 | 4.27E-04 | 6.25E-01 |    | 2.02E-02 | 2.07E-02 | 4.20E-04 | 4.79E-04 | 1.28E-01 | 5.45E-04 | 4.10E-04 | 1.08E-02 |    | 3.11E-04 |          |          |
| 7222403025 | 2.92E-04 | 5.62E-05 | 1.81E-01 | 1.20E-03 | 6.72E-01 |    | 1.88E-02 | 1.45E-02 | 3.42E-04 | 3.35E-04 | 9.90E-02 | 4.89E-04 | 5.49E-04 | 1.01E-02 |    | 2.20E-04 |          |          |
| 7222403045 | 2.92E-04 | 5.62E-05 | 1.81E-01 | 1.20E-03 | 6.72E-01 |    | 1.88E-02 | 1.45E-02 | 3.42E-04 | 3.35E-04 | 9.90E-02 | 4.89E-04 | 5.49E-04 | 1.01E-02 |    | 2.20E-04 |          |          |
| 7222403065 | 2.92E-04 | 5.62E-05 | 1.81E-01 | 1.20E-03 | 6.72E-01 |    | 1.88E-02 | 1.45E-02 | 3.42E-04 | 3.35E-04 | 9.90E-02 | 4.89E-04 | 5.49E-04 | 1.01E-02 |    | 2.20E-04 |          |          |
| 7222403085 | 2.92E-04 | 5.62E-05 | 1.81E-01 | 1.20E-03 | 6.72E-01 |    | 1.88E-02 | 1.45E-02 | 3.42E-04 | 3.35E-04 | 9.90E-02 | 4.89E-04 | 5.49E-04 | 1.01E-02 |    | 2.20E-04 |          |          |
| 7222406000 | 2.92E-04 | 5.62E-05 | 1.81E-01 | 1.20E-03 | 6.72E-01 |    | 1.88E-02 | 1.45E-02 | 3.42E-04 | 3.35E-04 | 9.90E-02 | 4.89E-04 | 5.49E-04 | 1.01E-02 |    | 2.20E-04 |          |          |
| 7223001005 | 2.23E-03 | 1.68E-03 | 1.68E-01 |          | 7.18E-01 |    | 1.56E-02 | 6.24E-03 | 4.93E-04 |          | 7.72E-02 | 4.30E-04 | 2.30E-04 | 1.06E-02 |    |          |          |          |
| 7223001016 | 2.23E-03 | 1.68E-03 | 1.68E-01 |          | 7.18E-01 |    | 1.56E-02 | 6.24E-03 | 4.93E-04 |          | 7.72E-02 | 4.30E-04 | 2.30E-04 | 1.06E-02 |    |          |          |          |
| 7223001031 | 2.23E-03 | 1.68E-03 | 1.68E-01 |          | 7.18E-01 |    | 1.56E-02 | 6.24E-03 | 4.93E-04 |          | 7.72E-02 | 4.30E-04 | 2.30E-04 | 1.06E-02 |    |          |          |          |
| 7223001046 | 2.23E-03 | 1.68E-03 | 1.68E-01 |          | 7.18E-01 |    | 1.56E-02 | 6.24E-03 | 4.93E-04 |          | 7.72E-02 | 4.30E-04 | 2.30E-04 | 1.06E-02 |    |          |          |          |
| 7223001061 | 2.23E-03 | 1.68E-03 | 1.68E-01 |          | 7.18E-01 |    | 1.56E-02 | 6.24E-03 | 4.93E-04 |          | 7.72E-02 | 4.30E-04 | 2.30E-04 | 1.06E-02 |    |          |          |          |
| 7223001076 | 2.23E-03 | 1.68E-03 | 1.68E-01 |          | 7.18E-01 |    | 1.56E-02 | 6.24E-03 | 4.93E-04 |          | 7.72E-02 | 4.30E-04 | 2.30E-04 | 1.06E-02 |    |          |          |          |
| 7223005000 | 2.23E-03 | 1.68E-03 | 1.68E-01 |          | 7.18E-01 |    | 1.56E-02 | 6.24E-03 | 4.93E-04 |          | 7.72E-02 | 4.30E-04 | 2.30E-04 | 1.06E-02 |    |          |          |          |
| 7223009000 | 2.23E-03 | 1.68E-03 | 1.68E-01 |          | 7.18E-01 |    | 1.56E-02 | 6.24E-03 | 4.93E-04 |          | 7.72E-02 | 4.30E-04 | 2.30E-04 | 1.06E-02 |    |          |          |          |
| 7301100000 |          | 5.00E-04 |          |          | 9.94E-01 |    | 1.00E-03 |          |          |          |          | 2.00E-03 | 1.00E-03 | 2.00E-03 |    |          |          |          |
| 7301201000 |          | 5.00E-04 |          |          | 9.94E-01 |    | 1.00E-03 |          |          |          |          | 2.00E-03 | 1.00E-03 | 2.00E-03 |    |          |          |          |
| 7301205000 |          | 1.50E-03 | 4.00E-02 |          | 9.46E-01 |    | 3.00E-03 | 4.50E-03 |          |          |          | 2.50E-04 | 5.00E-03 | 5.00E-03 |    |          |          |          |
| 7302101010 |          | 6.00E-03 |          |          | 9.77E-01 |    | 1.25E-02 |          |          |          |          | 5.00E-04 | 5.00E-04 | 3.50E-03 |    |          |          |          |
| 7302101015 |          | 6.00E-03 |          |          | 9.77E-01 |    | 1.25E-02 |          |          |          |          | 5.00E-04 | 5.00E-04 | 3.50E-03 |    |          |          |          |
| 7302101025 |          | 6.00E-03 |          |          | 9.77E-01 |    | 1.25E-02 |          |          |          |          | 5.00E-04 | 5.00E-04 | 3.50E-03 |    |          |          |          |
| 7302101075 |          | 6.00E-03 |          |          | 9.77E-01 |    | 1.25E-02 |          |          |          |          | 5.00E-04 | 5.00E-04 | 3.50E-03 |    |          |          |          |
| 7302105020 |          | 6.00E-03 |          |          | 9.77E-01 |    | 1.25E-02 |          |          |          |          | 5.00E-04 | 5.00E-04 | 3.50E-03 |    |          |          |          |
| 7302105060 |          | 6.00E-03 |          |          | 9.77E-01 |    | 1.25E-02 |          |          |          |          | 5.00E-04 | 5.00E-04 | 3.50E-03 |    |          |          |          |
| 7302300000 |          | 6.00E-03 |          |          | 9.77E-01 |    | 1.25E-02 |          |          |          |          | 5.00E-04 | 5.00E-04 | 3.50E-03 |    |          |          |          |
| 7302400000 |          | 6.00E-03 |          |          | 9.77E-01 |    | 1.25E-02 |          |          |          |          | 5.00E-04 | 5.00E-04 | 3.50E-03 |    |          |          |          |
| 7302909000 |          | 6.00E-03 |          |          | 9.77E-01 |    | 1.25E-02 |          |          |          |          | 5.00E-04 | 5.00E-04 | 3.50E-03 |    |          |          |          |
| 7304110020 |          | 8.00E-04 | 2.00E-01 |          | 6.65E-01 |    | 2.00E-02 |          | 1.00E-03 |          | 1.05E-01 | 4.50E-04 | 3.00E-04 | 7.50E-03 |    |          |          |          |
| 7304110050 |          | 8.00E-04 | 2.00E-01 |          | 6.65E-01 |    | 2.00E-02 |          | 1.00E-03 |          | 1.05E-01 | 4.50E-04 | 3.00E-04 | 7.50E-03 |    |          |          |          |
| 7304110080 |          | 8.00E-04 | 2.00E-01 |          | 6.65E-01 |    | 2.00E-02 |          | 1.00E-03 |          | 1.05E-01 | 4.50E-04 | 3.00E-04 | 7.50E-03 |    |          |          |          |
| 7304191020 |          | 2.80E-03 |          |          | 9.78E-01 |    | 1.40E-02 |          |          | 1.50E-03 |          | 3.00E-04 |          |          |    | 1.50E-03 | 1.50E-03 |          |
| 7304191030 |          | 2.80E-03 |          |          | 9.78E-01 |    | 1.40E-02 |          |          | 1.50E-03 |          | 3.00E-04 |          |          |    | 1.50E-03 | 1.50E-03 |          |
| 7304191045 |          | 2.80E-03 |          |          | 9.78E-01 |    | 1.40E-02 |          |          | 1.50E-03 |          | 3.00E-04 |          |          |    | 1.50E-03 | 1.50E-03 |          |
| 7304191060 |          | 2.80E-03 |          |          | 9.78E-01 |    | 1.40E-02 |          |          | 1.50E-03 |          | 3.00E-04 |          |          |    | 1.50E-03 | 1.50E-03 |          |
| 7304191080 |          | 2.80E-03 |          |          | 9.78E-01 |    | 1.40E-02 |          |          | 1.50E-03 |          | 3.00E-04 |          |          |    | 1.50E-03 | 1.50E-03 |          |
| 7304195020 |          | 3.00E-03 | 4.00E-03 | 4.00E-03 | 9.70E-01 |    | 1.20E-02 | 1.50E-03 |          |          | 4.00E-03 | 5.00E-04 | 4.50E-04 |          |    |          | 8.00E-04 |          |
| 7304195050 |          | 3.00E-03 | 4.00E-03 | 4.00E-03 | 9.70E-01 |    | 1.20E-02 | 1.50E-03 |          |          | 4.00E-03 | 5.00E-04 | 4.50E-04 |          |    |          | 8.00E-04 |          |
| 7304195080 |          | 3.00E-03 | 4.00E-03 | 4.00E-03 | 9.70E-01 |    | 1.20E-02 | 1.50E-03 |          |          | 4.00E-03 | 5.00E-04 | 4.50E-04 |          |    |          | 8.00E-04 |          |
| 7304220030 |          | 1.10E-02 |          | 2.50E-03 | 9.68E-01 |    | 5.50E-03 | 1.00E-03 |          |          | 4.00E-03 | 3.00E-04 | 2.50E-04 | 4.00E-03 |    |          |          | 3.00E-03 |
| 7304220045 |          | 1.10E-02 |          | 2.50E-03 | 9.68E-01 |    | 5.50E-03 | 1.00E-03 |          |          | 4.00E-03 | 3.00E-04 | 2.50E-04 | 4.00E-03 |    |          |          | 3.00E-03 |
| 7304220060 |          | 1.10E-02 |          | 2.50E-03 | 9.68E-01 |    | 5.50E-03 | 1.00E-03 |          |          | 4.00E-03 | 3.00E-04 | 2.50E-04 | 4.00E-03 |    |          |          | 3.00E-03 |
| 7304233000 |          | 2.70E-02 | 2.00E-02 |          | 8.97E-01 |    | 5.00E-03 |          |          |          | 4.50E-02 |          |          | 6.00E-03 |    |          |          |          |
| 7304236030 |          | 1.50E-04 | 1.25E-02 |          | 9.69E-01 |    | 6.10E-03 | 6.50E-03 |          |          |          | 2.50E-04 | 2.50E-04 | 5.00E-03 |    |          |          |          |
| 7304236045 |          | 1.50E-04 | 1.25E-02 |          | 9.69E-01 |    | 6.10E-03 | 6.50E-03 |          |          |          | 2.50E-04 | 2.50E-04 | 5.00E-03 |    |          |          |          |
| 7304243080 |          | 2.20E-03 | 1.40E-01 | 2.00E-03 | 8.34E-01 |    | 1.00E-02 |          |          |          | 2.00E-03 | 2.00E-04 | 1.00E-04 | 1.00E-02 |    |          |          |          |
| 7304244010 |          | 2.20E-03 | 1.40E-01 | 2.00E-03 | 8.34E-01 |    | 1.00E-02 |          |          |          | 2.00E-03 | 2.00E-04 | 1.00E-04 | 1.00E-02 |    |          |          |          |
| 7304244020 |          | 2.20E-03 | 1.40E-01 | 2.00E-03 | 8.34E-01 |    | 1.00E-02 |          |          |          | 2.00E-03 | 2.00E-04 | 1.00E-04 | 1.00E-02 |    |          |          |          |
| 7304246015 |          | 2.20E-03 | 1.40E-01 | 2.00E-03 | 8.34E-01 |    | 1.00E-02 |          |          |          | 2.00E-03 | 2.00E-04 | 1.00E-04 | 1.00E-02 |    |          |          |          |
| 7304246030 |          | 2.20E-03 | 1.40E-01 | 2.00E-03 | 8.34E-01 |    | 1.00E-02 |          |          |          | 2.00E-03 | 2.00E-04 | 1.00E-04 | 1.00E-02 |    |          |          |          |
| 7304246045 |          | 2.20E-03 | 1.40E-01 | 2.00E-03 | 8.34E-01 |    | 1.00E-02 |          |          |          | 2.00E-03 | 2.00E-04 | 1.00E-04 | 1.00E-02 |    |          |          |          |
| 7304246075 |          | 2.20E-03 | 1.40E-01 | 2.00E-03 | 8.34E-01 |    | 1.00E-02 |          |          |          | 2.00E-03 | 2.00E-04 | 1.00E-04 | 1.00E-02 |    |          |          |          |
| 7304291010 |          |          |          |          | 1.00E+00 |    |          |          |          |          |          | 5.00E-04 |          |          |    |          |          |          |
| 7304291020 |          |          |          |          | 1.00E+00 |    |          |          |          |          |          | 5.00E-04 |          |          |    |          |          |          |
| 7304291030 |          |          |          |          | 1.00E+00 |    |          |          |          |          |          | 5.00E-04 |          |          |    |          |          |          |
| 7304291040 |          |          |          |          | 1.00E+00 |    |          |          |          |          |          | 5.00E-04 |          |          |    |          |          |          |
| 7304291050 |          |          |          |          | 1.00E+00 |    |          |          |          |          |          | 5.00E-04 |          |          |    |          |          |          |
| 7304291060 |          |          |          |          | 1.00E+00 |    |          |          |          |          |          | 5.00E-04 |          |          |    |          |          |          |
| 7304292010 |          |          |          |          | 1.00E+00 |    |          |          |          |          |          | 5.00E-04 |          |          |    |          |          |          |
| 7304292020 |          |          |          |          | 1.00E+00 |    |          |          |          |          |          | 5.00E-04 |          |          |    |          |          |          |
| 7304292030 |          |          |          |          | 1.00E+00 |    |          |          |          |          |          | 5.00E-04 |          |          |    |          |          |          |
| 730        |          |          |          |          |          |    |          |          |          |          |          |          |          |          |    |          |          |          |

| HTS code   | Al       | C        | Cr       | Cu       | Fe       | Mg       | Mn       | Mo       | N        | Nb       | Ni       | P        | S        | Si       | Ta | Ti       | V        | Zr |
|------------|----------|----------|----------|----------|----------|----------|----------|----------|----------|----------|----------|----------|----------|----------|----|----------|----------|----|
| 7304296130 |          | 1.50E-03 | 4.00E-02 |          | 9.46E-01 |          | 3.00E-03 | 4.50E-03 |          |          |          | 2.50E-04 |          | 5.00E-03 |    |          |          |    |
| 7304296145 |          | 1.50E-03 | 4.00E-02 |          | 9.46E-01 |          | 3.00E-03 | 4.50E-03 |          |          |          | 2.50E-04 |          | 5.00E-03 |    |          |          |    |
| 7304313000 |          | 5.00E-04 |          |          | 9.94E-01 |          | 1.00E-03 |          |          |          |          | 2.00E-03 | 1.00E-03 | 2.00E-03 |    |          |          |    |
| 7304390008 |          | 2.50E-03 | 4.00E-03 | 4.00E-03 | 9.72E-01 | 9.30E-03 |          | 1.50E-03 |          |          | 4.00E-03 | 3.50E-04 | 3.50E-04 | 1.00E-03 |    |          | 8.00E-04 |    |
| 7304390016 |          | 2.50E-03 | 4.00E-03 | 4.00E-03 | 9.72E-01 | 9.30E-03 |          | 1.50E-03 |          |          | 4.00E-03 | 3.50E-04 | 3.50E-04 | 1.00E-03 |    |          | 8.00E-04 |    |
| 7304390020 |          | 2.50E-03 | 4.00E-03 | 4.00E-03 | 9.72E-01 | 9.30E-03 |          | 1.50E-03 |          |          | 4.00E-03 | 3.50E-04 | 3.50E-04 | 1.00E-03 |    |          | 8.00E-04 |    |
| 7304390028 |          | 2.50E-03 | 4.00E-03 | 4.00E-03 | 9.72E-01 | 9.30E-03 |          | 1.50E-03 |          |          | 4.00E-03 | 3.50E-04 | 3.50E-04 | 1.00E-03 |    |          | 8.00E-04 |    |
| 7304390032 |          | 2.50E-03 | 4.00E-03 | 4.00E-03 | 9.72E-01 | 9.30E-03 |          | 1.50E-03 |          |          | 4.00E-03 | 3.50E-04 | 3.50E-04 | 1.00E-03 |    |          | 8.00E-04 |    |
| 7304413005 | 1.50E-03 | 1.00E-03 | 2.50E-01 | 7.50E-03 | 3.88E-01 |          | 1.50E-02 |          |          |          | 3.20E-01 | 4.50E-04 | 1.50E-04 | 1.00E-02 |    | 6.00E-03 |          |    |
| 7304413015 |          | 8.00E-04 | 1.80E-01 |          | 6.20E-01 |          | 2.00E-02 | 3.00E-02 | 1.00E-03 |          | 1.40E-01 | 4.50E-04 | 3.00E-04 | 7.50E-03 |    |          |          |    |
| 7304413045 |          | 3.00E-04 | 2.30E-01 | 4.00E-03 | 4.52E-01 |          | 1.50E-02 | 6.00E-02 | 2.10E-03 |          | 2.30E-01 | 3.50E-04 | 2.00E-04 | 1.00E-02 |    |          |          |    |
| 7304416005 | 1.50E-03 | 1.00E-03 | 2.50E-01 | 7.50E-03 | 3.88E-01 |          | 1.50E-02 |          |          |          | 3.20E-01 | 4.50E-04 | 1.50E-04 | 1.00E-02 |    | 6.00E-03 |          |    |
| 7304416015 |          | 8.00E-04 | 1.80E-01 |          | 6.20E-01 |          | 2.00E-02 | 3.00E-02 | 1.00E-03 |          | 1.40E-01 | 4.50E-04 | 3.00E-04 | 7.50E-03 |    |          |          |    |
| 7304416045 |          | 3.00E-04 | 2.30E-01 | 4.00E-03 | 4.52E-01 |          | 1.50E-02 | 6.00E-02 | 2.10E-03 |          | 2.30E-01 | 3.50E-04 | 2.00E-04 | 1.00E-02 |    |          |          |    |
| 7304490005 | 1.50E-03 | 1.00E-03 | 2.50E-01 | 7.50E-03 | 3.88E-01 |          | 1.50E-02 |          |          |          | 3.20E-01 | 4.50E-04 | 1.50E-04 | 1.00E-02 |    | 6.00E-03 |          |    |
| 7304490015 |          | 8.00E-04 | 1.80E-01 |          | 6.20E-01 |          | 2.00E-02 | 3.00E-02 | 1.00E-03 |          | 1.40E-01 | 4.50E-04 | 3.00E-04 | 7.50E-03 |    |          |          |    |
| 7304490045 |          | 8.00E-04 | 1.80E-01 |          | 6.20E-01 |          | 2.00E-02 | 3.00E-02 | 1.00E-03 |          | 1.40E-01 | 4.50E-04 | 3.00E-04 | 7.50E-03 |    |          |          |    |
| 7304490060 |          | 3.00E-04 | 2.30E-01 | 4.00E-03 | 4.52E-01 |          | 1.50E-02 | 6.00E-02 | 2.10E-03 |          | 2.30E-01 | 3.50E-04 | 2.00E-04 | 1.00E-02 |    |          |          |    |
| 7304515005 |          | 8.00E-04 | 1.80E-01 |          | 6.20E-01 |          | 2.00E-02 | 3.00E-02 | 1.00E-03 |          | 1.40E-01 | 4.50E-04 | 3.00E-04 | 7.50E-03 |    |          |          |    |
| 7304515015 |          | 2.80E-03 | 1.80E-03 |          | 9.87E-01 |          | 4.00E-03 | 1.50E-03 |          |          |          | 3.50E-04 | 4.00E-04 | 2.00E-03 |    |          |          |    |
| 7304515045 |          | 1.50E-03 | 1.90E-02 |          | 9.59E-01 |          | 6.00E-03 | 8.70E-03 |          |          |          | 2.50E-04 | 2.50E-04 | 5.00E-03 |    |          |          |    |
| 7304515060 |          | 1.50E-03 | 1.90E-02 |          | 9.59E-01 |          | 6.00E-03 | 8.70E-03 |          |          |          | 2.50E-04 | 2.50E-04 | 5.00E-03 |    |          |          |    |
| 7304901000 |          | 5.00E-04 |          |          | 9.94E-01 |          | 1.00E-03 |          |          |          |          | 2.00E-03 | 1.00E-03 | 2.00E-03 |    |          |          |    |
| 7304903000 |          | 3.30E-03 | 1.10E-02 |          | 9.73E-01 |          | 6.00E-03 | 2.50E-03 |          |          |          | 3.50E-04 | 4.00E-04 | 3.00E-03 |    |          |          |    |
| 7304905000 |          | 5.00E-04 |          |          | 9.94E-01 |          | 1.00E-03 |          |          |          |          | 2.00E-03 | 1.00E-03 | 2.00E-03 |    |          |          |    |
| 7304907000 |          | 3.30E-03 | 1.10E-02 |          | 9.73E-01 |          | 6.00E-03 | 2.50E-03 |          |          |          | 3.50E-04 | 4.00E-04 | 3.00E-03 |    |          |          |    |
| 7305111030 |          | 1.60E-03 |          |          | 9.76E-01 |          | 1.65E-02 |          |          | 5.00E-04 |          | 2.00E-04 | 1.00E-04 | 4.50E-03 |    | 4.00E-04 | 7.00E-04 |    |
| 7305111060 |          | 1.60E-03 |          |          | 9.76E-01 |          | 1.65E-02 |          |          | 5.00E-04 |          | 2.00E-04 | 1.00E-04 | 4.50E-03 |    | 4.00E-04 | 7.00E-04 |    |
| 7305115000 |          | 3.30E-03 | 1.10E-02 |          | 9.73E-01 |          | 6.00E-03 | 2.50E-03 |          |          |          | 3.50E-04 | 4.00E-04 | 3.00E-03 |    |          |          |    |
| 7305121030 |          | 1.60E-03 |          |          | 9.76E-01 |          | 1.65E-02 |          |          | 5.00E-04 |          | 2.00E-04 | 1.00E-04 | 4.50E-03 |    | 4.00E-04 | 7.00E-04 |    |
| 7305121060 |          | 1.60E-03 |          |          | 9.76E-01 |          | 1.65E-02 |          |          | 5.00E-04 |          | 2.00E-04 | 1.00E-04 | 4.50E-03 |    | 4.00E-04 | 7.00E-04 |    |
| 7305125000 |          | 3.30E-03 | 1.10E-02 |          | 9.73E-01 |          | 6.00E-03 | 2.50E-03 |          |          |          | 3.50E-04 | 4.00E-04 | 3.00E-03 |    |          |          |    |
| 7305191060 |          | 1.60E-03 |          |          | 9.76E-01 |          | 1.65E-02 |          |          | 5.00E-04 |          | 2.00E-04 | 1.00E-04 | 4.50E-03 |    | 4.00E-04 | 7.00E-04 |    |
| 7305195000 |          | 3.30E-03 | 1.10E-02 |          | 9.73E-01 |          | 6.00E-03 | 2.50E-03 |          |          |          | 3.50E-04 | 4.00E-04 | 3.00E-03 |    |          |          |    |
| 7305204000 |          | 5.00E-04 |          |          | 9.94E-01 |          | 1.00E-03 |          |          |          | 2.00E-03 | 2.00E-03 | 1.00E-03 | 2.00E-03 |    |          |          |    |
| 7305208000 |          | 2.20E-03 | 1.40E-01 | 2.00E-03 | 8.34E-01 |          | 1.00E-02 |          |          | 5.00E-04 |          | 2.00E-04 | 1.00E-04 | 1.00E-02 |    |          |          |    |
| 7305314000 |          | 1.60E-03 |          |          | 9.76E-01 |          | 1.65E-02 |          |          | 5.00E-04 |          | 2.00E-04 | 1.00E-04 | 4.50E-03 |    | 4.00E-04 | 7.00E-04 |    |
| 7305316010 |          | 1.60E-03 |          |          | 9.76E-01 |          | 1.65E-02 |          |          | 5.00E-04 |          | 2.00E-04 | 1.00E-04 | 4.50E-03 |    | 4.00E-04 | 7.00E-04 |    |
| 7305905000 |          | 3.40E-03 | 1.50E-03 | 2.00E-03 | 9.76E-01 |          | 1.25E-02 |          |          |          | 2.00E-03 | 2.00E-04 | 1.50E-04 | 2.00E-03 |    |          |          |    |
| 7306110010 |          | 8.00E-04 | 2.00E-01 |          | 6.65E-01 |          | 2.00E-02 |          | 1.00E-03 |          | 1.05E-01 | 4.50E-04 | 3.00E-04 | 7.50E-03 |    |          |          |    |
| 7306110050 |          | 8.00E-04 | 2.00E-01 |          | 6.65E-01 |          | 2.00E-02 |          | 1.00E-03 |          | 1.05E-01 | 4.50E-04 | 3.00E-04 | 7.50E-03 |    |          |          |    |
| 7306191010 |          | 1.60E-03 |          |          | 9.76E-01 |          | 1.65E-02 |          |          | 5.00E-04 |          | 2.00E-04 | 1.00E-04 | 4.50E-03 |    | 4.00E-04 | 7.00E-04 |    |
| 7306191050 |          | 1.60E-03 |          |          | 9.76E-01 |          | 1.65E-02 |          |          | 5.00E-04 |          | 2.00E-04 | 1.00E-04 | 4.50E-03 |    | 4.00E-04 | 7.00E-04 |    |
| 7306195150 |          | 1.60E-03 |          |          | 9.76E-01 |          | 1.65E-02 |          |          | 5.00E-04 |          | 2.00E-04 | 1.00E-04 | 4.50E-03 |    | 4.00E-04 | 7.00E-04 |    |
| 7306214000 |          | 8.00E-04 | 2.00E-01 |          | 6.65E-01 |          | 2.00E-02 |          | 1.00E-03 |          | 1.05E-01 | 4.50E-04 | 3.00E-04 | 7.50E-03 |    |          |          |    |
| 7306218050 |          | 8.00E-04 | 2.00E-01 |          | 6.65E-01 |          | 2.00E-02 |          | 1.00E-03 |          | 1.05E-01 | 4.50E-04 | 3.00E-04 | 7.50E-03 |    |          |          |    |
| 7306291030 |          | 3.40E-03 | 1.50E-03 | 2.00E-03 | 9.76E-01 |          | 1.25E-02 |          |          |          | 2.00E-03 | 2.00E-04 | 1.50E-04 | 2.00E-03 |    |          |          |    |
| 7306291090 |          | 3.40E-03 | 1.50E-03 | 2.00E-03 | 9.76E-01 |          | 1.25E-02 |          |          |          | 2.00E-03 | 2.00E-04 | 1.50E-04 | 2.00E-03 |    |          |          |    |
| 7306292000 |          | 3.40E-03 | 1.50E-03 | 2.00E-03 | 9.76E-01 |          | 1.25E-02 |          |          |          | 2.00E-03 | 2.00E-04 | 1.50E-04 | 2.00E-03 |    |          |          |    |
| 7306294100 |          | 3.40E-03 | 1.50E-03 | 2.00E-03 | 9.76E-01 |          | 1.25E-02 |          |          |          | 2.00E-03 | 2.00E-04 | 1.50E-04 | 2.00E-03 |    |          |          |    |
| 7306296010 |          | 3.40E-03 | 1.50E-03 | 2.00E-03 | 9.76E-01 |          | 1.25E-02 |          |          |          | 2.00E-03 | 2.00E-04 | 1.50E-04 | 2.00E-03 |    |          |          |    |
| 7306296050 |          | 3.40E-03 | 1.50E-03 | 2.00E-03 | 9.76E-01 |          | 1.25E-02 |          |          |          | 2.00E-03 | 2.00E-04 | 1.50E-04 | 2.00E-03 |    |          |          |    |
| 7306298150 |          | 3.40E-03 | 1.50E-03 | 2.00E-03 | 9.76E-01 |          | 1.25E-02 |          |          |          | 2.00E-03 | 2.00E-04 | 1.50E-04 | 2.00E-03 |    |          |          |    |



## Commodity applications and associated NAICS codes

In table S4, major applications for each commodity are identified and described. The North American Industry Classification System (NAICS) codes associated with each application are also identified. Note that in some cases, the NAICS codes change from year to year. The years for which the NAICS codes are applicable are noted within parentheses. The data sources for demand fractions for each application category are also identified in the table along with any pertinent notes. In certain cases, the data necessary to calculate the Operating Profit of the sector are withheld by the U.S. Census Bureau to avoid disclosing company proprietary information. In these cases, a higher level NAICS code is utilized.

**Table S4. Description of applications, associated NAICS codes, and U.S. demand fractions for each commodity.**

| Commodity | Application category                                                   | Application description                                               | Associated NAICS codes<br>(applicable years)                                                                                                                                                                                                                                                                                                             | U.S. demand fraction                                                                                                       |                       |
|-----------|------------------------------------------------------------------------|-----------------------------------------------------------------------|----------------------------------------------------------------------------------------------------------------------------------------------------------------------------------------------------------------------------------------------------------------------------------------------------------------------------------------------------------|----------------------------------------------------------------------------------------------------------------------------|-----------------------|
|           |                                                                        |                                                                       |                                                                                                                                                                                                                                                                                                                                                          | Notes                                                                                                                      | References            |
| Alumina   | Primary aluminum production                                            | The primary feed to smelters to produce aluminum                      | <b>331312</b> (2007-2011);<br><b>331313</b> (2012-2016)                                                                                                                                                                                                                                                                                                  | Demand fractions are based on domestically produced alumina shipments and imports as noted in the references               | (41-46, 505, 543-545) |
|           | Other                                                                  | Various uses include abrasives, chemicals, refractories, among others | <b>327910</b> (2007-2016);<br><b>325188</b> (2007-2011);<br><b>325180</b> (2012-2016);<br><b>327113</b> (2007-2011);<br><b>327110</b> (2012-2016);<br><b>327125</b> (2007-2011);<br><b>327120</b> (2012-2016)                                                                                                                                            |                                                                                                                            |                       |
| Aluminum  | Building and construction – Windows, doors, and screens                |                                                                       | <b>332321</b> (2007, 2012-2016);<br><b>33232</b> (2008-2011)                                                                                                                                                                                                                                                                                             | Demand fractions are based on aluminum shipments by category in the United States and Canada as reported by the reference. | (546)                 |
|           | Building and construction – Awnings, canopies and residential siding   |                                                                       | <b>332322</b> (2007, 2012-2016); <b>33232</b> (2008-2011)                                                                                                                                                                                                                                                                                                |                                                                                                                            |                       |
|           | Building and construction – Manufactured homes                         |                                                                       | <b>321991</b> (2007-2016);<br><b>321992</b> (2007-2016)                                                                                                                                                                                                                                                                                                  |                                                                                                                            |                       |
|           | Building and construction – Curtain walls, store fronts, and entrances |                                                                       | <b>332323</b> (2007, 2012-2016);<br><b>33232</b> (2008-2011)                                                                                                                                                                                                                                                                                             |                                                                                                                            |                       |
|           | Building and construction – Bridges, streets, and highways             |                                                                       | <b>332312</b> (2007, 2012-2016); <b>33231</b> (2008-2011)                                                                                                                                                                                                                                                                                                |                                                                                                                            |                       |
|           | Building and construction – Gutters and downspouts                     |                                                                       | <b>332114</b> (2007-2016)                                                                                                                                                                                                                                                                                                                                |                                                                                                                            |                       |
|           | Building and construction – Other                                      |                                                                       | <b>321213</b> (2007, 2012-2013, 2015-2016);<br><b>32121</b> (2008-2011, 2014); <b>321214</b> (2007, 2012-2013; 2015-2016)<br><b>321999</b> (2007-2016);<br><b>332311</b> (2007, 2012-2016);<br><b>332911</b> (2007, 2012-2016);<br><b>332912</b> (2007, 2012-2016);<br><b>332913</b> (2007, 2012-2016);<br><b>332919</b> (2007, 2012-2016); <b>33291</b> |                                                                                                                            |                       |

| Commodity | Application category                                              | Application description | Associated NAICS codes<br>(applicable years)                                                                                                                                                                                                                                                                                                                                                                                                                                                                                                                                                                                  | U.S. demand fraction |            |
|-----------|-------------------------------------------------------------------|-------------------------|-------------------------------------------------------------------------------------------------------------------------------------------------------------------------------------------------------------------------------------------------------------------------------------------------------------------------------------------------------------------------------------------------------------------------------------------------------------------------------------------------------------------------------------------------------------------------------------------------------------------------------|----------------------|------------|
|           |                                                                   |                         |                                                                                                                                                                                                                                                                                                                                                                                                                                                                                                                                                                                                                               | Notes                | References |
|           |                                                                   |                         | (2008-2011);<br><b>332996</b> (2007, 2012-2016);                                                                                                                                                                                                                                                                                                                                                                                                                                                                                                                                                                              |                      |            |
|           | Consumer durables – air conditioners, freezers, and refrigerators |                         | <b>333415</b> (2007-2016);<br><b>335222</b> (2007-2009);<br><b>33522</b> (2010-2016)                                                                                                                                                                                                                                                                                                                                                                                                                                                                                                                                          |                      |            |
|           | Consumer durables – portable appliances                           |                         | <b>335211</b> (2007);<br><b>33521</b> (2008-2011);<br><b>335210</b> (2012-2106)                                                                                                                                                                                                                                                                                                                                                                                                                                                                                                                                               |                      |            |
|           | Consumer durables – Cookware and cooking utensils                 |                         | <b>332214</b> (2007);<br><b>332211</b> (2007);<br><b>33221</b> (2008-2011, 2013);<br><b>332215</b> (2012, 2014-2016)                                                                                                                                                                                                                                                                                                                                                                                                                                                                                                          |                      |            |
|           | Consumer durables – Other                                         |                         | <b>332999</b> (2007, 2012-2016);<br><b>337121</b> (2007, 2012-2016);<br><b>337122</b> (2007, 2012-2016);<br><b>337124</b> (2007, 2012-2016);<br><b>337125</b> (2007, 2012-2016);<br><b>337127</b> (2007, 2012-2016); <b>33712</b><br>(2008-2011);<br><b>337211</b> (2007, 2012-2016);<br><b>337212</b> (2007, 2012-2016);<br><b>337214</b> (2007, 2012-2016);<br><b>337215</b> (2007, 2012-2016);<br><b>33721</b> (2008-2011);<br><b>337920</b> (2007-2016);<br><b>339920</b> (2007-2016)                                                                                                                                     |                      |            |
|           | Containers and packaging – household and institutional foil       |                         | <b>311340</b> (2007-2016);<br><b>311320</b> (2007-2011);<br><b>311351</b> (2012-2016);<br><b>311330</b> (2007-2011);<br><b>311352</b> (2012-2016);<br><b>311411</b> (2007, 2012-2016);<br><b>31141</b> (2008-2011);<br><b>311412</b> (2007, 2012-2016);<br><b>311423</b> (2007, 2012-2016);<br><b>311812</b> (2007, 2012-2016);<br><b>311813</b> (2007, 2012-2016);<br><b>31181</b> (2008-2011);<br><b>311821</b> (2007, 2012-2016);<br><b>31182</b> (2008-2011);<br><b>311822</b> (2007);<br><b>311824</b> (2012-2016);<br><b>322211</b> (2007, 2012-2016);<br><b>322212</b> (2007, 2012-2016);<br><b>32221</b> (2008-2011); |                      |            |

| Commodity | Application category                                                       | Application description | Associated NAICS codes<br>(applicable years)                                                                                                                                                                                                                                                                                                                                                                                                                                                                                                                                                                                                                                                                                                            | U.S. demand fraction |            |
|-----------|----------------------------------------------------------------------------|-------------------------|---------------------------------------------------------------------------------------------------------------------------------------------------------------------------------------------------------------------------------------------------------------------------------------------------------------------------------------------------------------------------------------------------------------------------------------------------------------------------------------------------------------------------------------------------------------------------------------------------------------------------------------------------------------------------------------------------------------------------------------------------------|----------------------|------------|
|           |                                                                            |                         |                                                                                                                                                                                                                                                                                                                                                                                                                                                                                                                                                                                                                                                                                                                                                         | Notes                | References |
|           |                                                                            |                         | <b>322213</b> (2007);<br><b>322214</b> (2007);<br><b>322215</b> (2007);<br><b>322212</b> (2012-2016);<br><b>322219</b> (2012-2016);<br><b>322221</b> (2007);<br><b>322223</b> (2007);<br><b>322224</b> (2007);<br><b>322225</b> (2007);<br><b>32222</b> (2008-2011);<br><b>322220</b> (2012-2016);<br><b>326111</b> (2007-2016);<br><b>326112</b> (2007-2016);<br><b>327993</b> (2007-2016)                                                                                                                                                                                                                                                                                                                                                             |                      |            |
|           | Containers and packaging – metal cans and other semi-rigid food containers |                         | <b>332431</b> (2007, 2012-2016);<br><b>332439</b> (2007, 2012-2016); <b>33243</b><br>(2008-2011);<br><b>332115</b> (2007);<br><b>332116</b> (2007);<br><b>332119</b> (2012-2016);                                                                                                                                                                                                                                                                                                                                                                                                                                                                                                                                                                       |                      |            |
|           | Containers and packaging – other containers                                |                         | <b>332420</b> (2007-2016)                                                                                                                                                                                                                                                                                                                                                                                                                                                                                                                                                                                                                                                                                                                               |                      |            |
|           | Electrical – all                                                           |                         | <b>334111</b> (2007-2016);<br><b>334112</b> (2007-2016);<br><b>334113</b> (2007-2011);<br><b>334118</b> (2012-2016);<br><b>334119</b> (2007);<br><b>334210</b> (2007, 2012-2016);<br><b>334220</b> (2007, 2012-2016);<br><b>334290</b> (2007, 2012-2016);<br><b>3342</b> (2008-2011);<br><b>334310</b> (2007-2016);<br><b>334412</b> (2007-2016);<br><b>334413</b> (2007-2016);<br><b>334416</b> (2007-2016);<br><b>334417</b> (2007-2016);<br><b>334418</b> (2007-2016);<br><b>334419</b> (2007-2016);<br><b>334510</b> (2007-2016);<br><b>334511</b> (2007-2016);<br><b>334512</b> (2007-2016);<br><b>334513</b> (2007-2016);<br><b>334514</b> (2007-2016);<br><b>334515</b> (2007-2016);<br><b>334516</b> (2007-2016);<br><b>334517</b> (2007-2016); |                      |            |

| Commodity | Application category        | Application description | Associated NAICS codes<br>(applicable years)                                                                                                                                                                                                                                                                                                                                                                                                                                                                                                                                                                                                                                                                                                                                                                                                                                                                                                                                              | U.S. demand fraction |            |
|-----------|-----------------------------|-------------------------|-------------------------------------------------------------------------------------------------------------------------------------------------------------------------------------------------------------------------------------------------------------------------------------------------------------------------------------------------------------------------------------------------------------------------------------------------------------------------------------------------------------------------------------------------------------------------------------------------------------------------------------------------------------------------------------------------------------------------------------------------------------------------------------------------------------------------------------------------------------------------------------------------------------------------------------------------------------------------------------------|----------------------|------------|
|           |                             |                         |                                                                                                                                                                                                                                                                                                                                                                                                                                                                                                                                                                                                                                                                                                                                                                                                                                                                                                                                                                                           | Notes                | References |
|           |                             |                         | <b>334519</b> (2007-2016);<br><b>335121</b> (2007, 2012-2016);<br><b>335122</b> (2007, 2012-2016);<br><b>335129</b> (2007, 2012-2016);<br><b>33512</b> (2008-2011);<br><b>335313</b> (2007-2016);<br><b>335314</b> (2007-2016);<br><b>335921</b> (2007, 2012-2016);<br><b>335929</b> (2007, 2012-2016);<br><b>33592</b> (2008-2011);<br><b>335931</b> (2007, 2012-2016);<br><b>335932</b> (2007, 2012-2016);<br><b>33593</b> (2008-2011);<br><b>335999</b> (2007-2016)                                                                                                                                                                                                                                                                                                                                                                                                                                                                                                                    |                      |            |
|           | Machinery & equipment – all |                         | <b>333111</b> (2007-2016);<br><b>333112</b> (2007-2016);<br><b>333295</b> (2007);<br><b>333298</b> (2007);<br><b>333313</b> (2007);<br><b>33329</b> (2008-2011);<br><b>333242</b> (2012-2016);<br><b>333249</b> (2012-2016);<br><b>333314</b> (2007-2016);<br><b>333315</b> (2007-2011);<br><b>333316</b> (2012-2016);<br><b>333319</b> (2007);<br><b>333318</b> (2012-2016);<br><b>333511</b> (2007-2016);<br><b>333514</b> (2007-2016);<br><b>333515</b> (2007-2016);<br><b>333512</b> (2007-2011);<br><b>333513</b> (2007-2011);<br><b>333516</b> (2007-2011);<br><b>333517</b> (2012-2016);<br><b>333518</b> (2007-2011);<br><b>333519</b> (2012-2016);<br><b>333611</b> (2007-2016);<br><b>333612</b> (2007-2016);<br><b>333613</b> (2007-2016);<br><b>333618</b> (2007-2016);<br><b>333911</b> (2007-2016);<br><b>333912</b> (2007-2016);<br><b>333913</b> (2007-2016);<br><b>333921</b> (2007, 2012-2016);<br><b>333922</b> (2007, 2012-2016);<br><b>333924</b> (2007, 2012-2016); |                      |            |

| Commodity | Application category | Application description                                                     | Associated NAICS codes<br>(applicable years)                                                                                                                                                                                                                                                                                                                                                                                                                                                             | U.S. demand fraction |            |
|-----------|----------------------|-----------------------------------------------------------------------------|----------------------------------------------------------------------------------------------------------------------------------------------------------------------------------------------------------------------------------------------------------------------------------------------------------------------------------------------------------------------------------------------------------------------------------------------------------------------------------------------------------|----------------------|------------|
|           |                      |                                                                             |                                                                                                                                                                                                                                                                                                                                                                                                                                                                                                          | Notes                | References |
|           |                      |                                                                             | <b>33392</b> (2008-2011);<br><b>333991</b> (2007, 2012-2016);<br><b>333992</b> (2007, 2012-2016);<br><b>333995</b> (2007, 2012-2016);<br><b>333996</b> (2007, 2012-2016);<br><b>333999</b> (2007, 2012-2016);<br><b>33399</b> (2008-2011);<br><b>333120</b> (2007-2016)                                                                                                                                                                                                                                  |                      |            |
|           |                      | Transportation – trucks and buses (over 10,000 pounds gross vehicle weight) | <b>336120</b> (2007-2016)                                                                                                                                                                                                                                                                                                                                                                                                                                                                                |                      |            |
|           |                      | Transportation – passenger cars and light trucks                            | <b>336111</b> (2007-2016);<br><b>336112</b> (2007-2016);<br><b>336211</b> (2007-2016);<br><b>336311</b> (2007);<br><b>336312</b> (2007);<br><b>336310</b> (2012-2016);<br><b>36631</b> (2008-2011);<br><b>336322</b> (2007);<br><b>336320</b> (2012-2016);<br><b>33632</b> (2008-2011);<br><b>336330</b> (2007-2016);<br><b>336340</b> (2007-2016);<br><b>336350</b> (2007-2016);<br><b>336360</b> (2007-2016);<br><b>336391</b> (2007-2011);<br><b>336399</b> (2007-2011);<br><b>336390</b> (2012-2016) |                      |            |
|           |                      | Transportation – trailers and semitrailers                                  | <b>336212</b> (2007-2016);<br><b>336213</b> (2007-2016);<br><b>336214</b> (2007-2016)                                                                                                                                                                                                                                                                                                                                                                                                                    |                      |            |
|           |                      | Transportation – Other                                                      | <b>336412</b> (2007-2016);<br><b>336413</b> (2007-2016);<br><b>336611</b> (2007-2016);<br><b>336612</b> (2007-2016);<br><b>336991</b> (2007-2016);<br><b>336992</b> (2007-2016);<br><b>336999</b> (2007-2016)                                                                                                                                                                                                                                                                                            |                      |            |
|           |                      | Other – all other not elsewhere specified                                   | <b>332212</b> (2007);<br><b>332213</b> (2007);<br><b>332216</b> (2012-2016);<br><b>332313</b> (2007, 2012-2016);<br><b>332410</b> (2007-2016);<br><b>332510</b> (2007-2016);<br><b>332710</b> (2007-2016);<br><b>332721</b> (2007-2016);<br><b>332722</b> (2007-2016);                                                                                                                                                                                                                                   |                      |            |

| Commodity | Application category             | Application description                                                                                                                                                                                                                                                             | Associated NAICS codes<br>(applicable years)                                                                                                                                                                                                                                                                                                             | U.S. demand fraction                                                                                                                                                                                                                                                                                           |                  |
|-----------|----------------------------------|-------------------------------------------------------------------------------------------------------------------------------------------------------------------------------------------------------------------------------------------------------------------------------------|----------------------------------------------------------------------------------------------------------------------------------------------------------------------------------------------------------------------------------------------------------------------------------------------------------------------------------------------------------|----------------------------------------------------------------------------------------------------------------------------------------------------------------------------------------------------------------------------------------------------------------------------------------------------------------|------------------|
|           |                                  |                                                                                                                                                                                                                                                                                     |                                                                                                                                                                                                                                                                                                                                                          | Notes                                                                                                                                                                                                                                                                                                          | References       |
|           |                                  |                                                                                                                                                                                                                                                                                     | <b>332991</b> (2007-2016);<br><b>332992</b> (2007-2016);<br><b>332993</b> (2007-2016);<br><b>332994</b> (2007-2016);<br><b>339999</b> (2007-2016);                                                                                                                                                                                                       |                                                                                                                                                                                                                                                                                                                |                  |
| Antimony  | Ammunition                       | Hardener of lead used in ammunition (bullets and shorts), which for the United States are almost exclusively used for small arms (547, 548)                                                                                                                                         | <b>332992</b> (2007-2016)                                                                                                                                                                                                                                                                                                                                | Demand fractions are based on reported U.S. industrial consumption as noted in the references. Data for specific applications are withheld by the references to avoid disclosing company proprietary information. Importantly, reported consumption is notably lower than the calculated apparent consumption. | (55–60, 549–551) |
|           | Ammunition primer                | As a friction element and heat-transfer medium in primers for ammunition and explosives (547, 548)                                                                                                                                                                                  | <b>325920</b> (2007-2016)                                                                                                                                                                                                                                                                                                                                |                                                                                                                                                                                                                                                                                                                |                  |
|           | Antimonial lead                  | Primarily used with lead (to make it easier to cast and increases its hardness) plates, connectors, and terminals in lead-acid batteries that are mainly used for vehicles (547, 548)                                                                                               | <b>335911</b> (2007-2016);<br><b>335912</b> (2007-2016)                                                                                                                                                                                                                                                                                                  |                                                                                                                                                                                                                                                                                                                |                  |
|           | Cable covering                   | Alloyed with lead for sheathing of electrical power and communications cables (547, 548)                                                                                                                                                                                            | <b>335929</b> (2007, 2012-2016);<br><b>33592</b> (2008-2011)                                                                                                                                                                                                                                                                                             |                                                                                                                                                                                                                                                                                                                |                  |
|           | Ceramics and glass               | Fining agents, decolorant, and anti-solarant for transparent glass, mainly for cathode ray tube (CRT) televisions; Opacifiers in ceramics, mainly in lead-free porcelain enamels for cast iron and steel plumbing fixtures; as well as a colorant for pottery and clays (73, 547)   | <b>327211</b> (2007-2016);<br><b>327212</b> (2007-2016);<br><b>327213</b> (2007-2016);<br><b>327215</b> (2007-2016);<br><b>332998</b> (2007);<br><b>332999</b> (2008-2011);<br><b>332999</b> (2012-2016);<br><b>327111</b> (2007-2011);<br><b>327110</b> (2012-2016);<br><b>327124</b> (2007);<br><b>32712</b> (2008-2011);<br><b>327120</b> (2012-2016) |                                                                                                                                                                                                                                                                                                                |                  |
|           | Flame retardants                 | Flame retardant, typically combined with halogens, for use mainly in various plastics and textiles, but also in pigments, rubber products, adhesives, and paper (73, 547)                                                                                                           | <b>325998</b> (2007, 2012-2016);<br><b>32599N</b> (2008-2011)                                                                                                                                                                                                                                                                                            |                                                                                                                                                                                                                                                                                                                |                  |
|           | Pigments                         | Pigment for oil-based exterior paints and enamels (no longer used as a white pigment for exterior paints in the United States), anti-solarant for paints, such as yellow paints on school buses, coloring of rubber, and electroconductive pigments for electronic components (547) | <b>325131</b> (2007);<br><b>32513</b> (2008-2011);<br><b>325130</b> (2012-2016);<br><b>325510</b> (2007-2016)                                                                                                                                                                                                                                            |                                                                                                                                                                                                                                                                                                                |                  |
|           | Plastics                         | Heat stabilizers for common plastics, especially rigid forms of polyvinyl chloride (PVC); polycondensation catalysts in the manufacture of polyethylene terephthalate (PET) (547)                                                                                                   | <b>325211</b> (2007-2016);<br><b>325222</b> (2007);<br><b>32522</b> (2008-2011);<br><b>325220</b> (2012-2016);<br><b>325188</b> (2007-2011);<br><b>325180</b> (2012-2016)                                                                                                                                                                                |                                                                                                                                                                                                                                                                                                                |                  |
|           | Rubbers                          | Vulcanization of rubber compounds (73, 547)                                                                                                                                                                                                                                         | <b>325212</b> (2007-2016)                                                                                                                                                                                                                                                                                                                                |                                                                                                                                                                                                                                                                                                                |                  |
|           | Other                            | Bearing metals and bearings, castings, sheet and pipe, solder, and type metal (547)                                                                                                                                                                                                 | <b>331491</b> (2007,2012-2016);<br><b>33149</b> (2008-2011);<br><b>311492</b> (2007, 2012-2016)                                                                                                                                                                                                                                                          |                                                                                                                                                                                                                                                                                                                |                  |
| Arsenic   | Wood preservation and pesticides | Chromated copper arsenide (CCA) preservatives used for pressure treating lumber, as well as used in herbicides and insecticide (117)                                                                                                                                                | <b>321114</b> (2007, 2012-2016);<br><b>32111</b> (2008-2011);                                                                                                                                                                                                                                                                                            | No detailed U.S. demand fraction data are available. The following demand                                                                                                                                                                                                                                      |                  |

| Commodity | Application category  | Application description                                                                                                                                                                                                                                                                                                                                                                      | Associated NAICS codes<br>(applicable years)                                                                                                                                                                                                                        | U.S. demand fraction                                                                                                                             |                        |
|-----------|-----------------------|----------------------------------------------------------------------------------------------------------------------------------------------------------------------------------------------------------------------------------------------------------------------------------------------------------------------------------------------------------------------------------------------|---------------------------------------------------------------------------------------------------------------------------------------------------------------------------------------------------------------------------------------------------------------------|--------------------------------------------------------------------------------------------------------------------------------------------------|------------------------|
|           |                       |                                                                                                                                                                                                                                                                                                                                                                                              |                                                                                                                                                                                                                                                                     | Notes                                                                                                                                            | References             |
|           |                       |                                                                                                                                                                                                                                                                                                                                                                                              | <b>325320</b> (2007-2016)                                                                                                                                                                                                                                           | fraction are assumed for each application category: wood preservation and pesticides 68%; nonferrous alloys 7%; semiconductors 7%; other 18%     |                        |
|           | Nonferrous alloys     | Grids in lead-acid storage batteries, hardener for ammunition, as well as an antifriction additive for bearings, lead shot, and clip-on wheel weights ( <i>117</i> )                                                                                                                                                                                                                         | <b>335911</b> (2007-2016);<br><b>332992</b> (2007-2016);<br><b>331491</b> (2007,2012-2016);<br><b>33149</b> (2008-2011)                                                                                                                                             |                                                                                                                                                  |                        |
|           | Semiconductors        | High-purity arsenic used in semiconductor applications including gallium-arsenide, germanium-arsenide-selenide, and indium-gallium-arsenide ( <i>117</i> )                                                                                                                                                                                                                                   | <b>334413</b> (2007-2016)                                                                                                                                                                                                                                           |                                                                                                                                                  |                        |
|           | Other                 | Other applications in the glass (fining agent), ceramics (decolorizing), and pharmaceutical industries                                                                                                                                                                                                                                                                                       | <b>327211</b> (2007-2016);<br><b>327212</b> (2007-2016);<br><b>327213</b> (2007-2016);<br><b>327215</b> (2007-2016);<br><b>325131</b> (2007);<br><b>32513</b> (2008-2011);<br><b>325130</b> (2012-2016);<br><b>325412</b> (2007-2016)                               |                                                                                                                                                  |                        |
| Barite    | Well drilling         | Barite used as a weighting agent in fluids for oil and natural gas well drilling ( <i>117</i> )                                                                                                                                                                                                                                                                                              | <b>325998</b> (2007, 2012-2016);<br><b>32599</b> (2008-2011)                                                                                                                                                                                                        | Demand fractions are based on crushed and ground barite sold or used by processors in the United States                                          | (82-87, 113-115)       |
|           | Other                 | Various uses as a filler, extender, or weighting agent in paints, plastics, and sealants, adhesives, and rubber ( <i>117</i> )                                                                                                                                                                                                                                                               | <b>325131</b> (2007);<br><b>32513</b> (2008-2011);<br><b>325130</b> (2012-2016);<br><b>325188</b> (2007-2011);<br><b>325180</b> (2012-2016);<br><b>325212</b> (2007-2016);<br><b>325412</b> (2007-2016);<br><b>327993</b> (2007-2016);<br><b>327999</b> (2007-2016) |                                                                                                                                                  |                        |
| Bauxite   | Alumina production    | Primary feed for alumina refineries                                                                                                                                                                                                                                                                                                                                                          | <b>331311</b> (2007-2011);<br><b>331313</b> (2012-2016)                                                                                                                                                                                                             | Demand fractions are based on U.S. consumption by industry                                                                                       | (41-46, 505, 543, 544) |
|           | Other                 | Various applications including abrasives, chemicals, and refractory uses                                                                                                                                                                                                                                                                                                                     | <b>325188</b> (2007-2011);<br><b>325180</b> (2012-2016);<br><b>327125</b> (2007);<br><b>32712</b> (2008-2011);<br><b>327120</b> (2012-2016);<br><b>327910</b> (2007-2016)                                                                                           |                                                                                                                                                  |                        |
| Beryllium | Aerospace and defense | Aircraft structural components (beryllium metal), aircraft landing gear bushings (beryllium alloys), inertial guidance systems (beryllium metal), optical targeting systems (beryllium metal), radar (beryllium oxide), satellite and space telescope mirrors (beryllium metal), connectors in aircraft electronics (beryllium alloys), and heat shields on space vehicles (beryllium metal) | <b>333314</b> (2007-2016);<br><b>334511</b> (2007-2016);<br><b>336411</b> (2007-2012);<br><b>336413</b> (2007-2012);<br><b>336414</b> (2007-2012);<br><b>336415</b> (2007-2012);<br><b>336419</b> (2007-2012);<br><b>33641</b> (2013-2016)                          | Demand fractions are based on sales revenue and value-added sales by market segment for Materion Corporation (formerly known as Brush Engineered | (552-561)              |
|           | Automotive            | Switches, relays, and connectors (beryllium alloys), airbag mechanisms                                                                                                                                                                                                                                                                                                                       | <b>335312</b> (2007-2016);                                                                                                                                                                                                                                          |                                                                                                                                                  |                        |

| Commodity                            | Application category                                                                                                                                                                                                                                                                              | Application description                                                                                                                                                                                                                                                         | Associated NAICS codes<br>(applicable years)                                                                                                                                                                                                                                                                                                            | U.S. demand fraction |            |
|--------------------------------------|---------------------------------------------------------------------------------------------------------------------------------------------------------------------------------------------------------------------------------------------------------------------------------------------------|---------------------------------------------------------------------------------------------------------------------------------------------------------------------------------------------------------------------------------------------------------------------------------|---------------------------------------------------------------------------------------------------------------------------------------------------------------------------------------------------------------------------------------------------------------------------------------------------------------------------------------------------------|----------------------|------------|
|                                      |                                                                                                                                                                                                                                                                                                   |                                                                                                                                                                                                                                                                                 |                                                                                                                                                                                                                                                                                                                                                         | Notes                | References |
|                                      |                                                                                                                                                                                                                                                                                                   | (beryllium alloys), anti-lock brake systems (beryllium alloys), transmissions (beryllium alloys), electric motors (beryllium alloys), traction control systems (beryllium alloys), fuel injection systems (beryllium alloys), and electronic ignition systems (beryllium oxide) | <b>335314</b> (2007-2016);<br><b>336312</b> (2007);<br><b>33631</b> (2008-2011);<br><b>336310</b> (2012-2016);<br><b>336322</b> (2007);<br><b>33632</b> (2008-2011);<br><b>336320</b> (2012-2016);<br><b>336330</b> (2007-2016);<br><b>336340</b> (2007-2016);<br><b>336350</b> (2007-2016);<br><b>336399</b> (2007-2011);<br><b>336390</b> (2012-2016) | Materials, Inc.)     |            |
| Consumer electronics                 | Switches, relays, and sensors (beryllium alloys), springs, contacts, and connectors (beryllium alloys), electromagnetic shielding (beryllium alloys), integrated circuit sockets (beryllium alloys), and audio speaker drivers (beryllium metal)                                                  | <b>334111</b> (2007-2016);<br><b>334113</b> (2007-2011);<br><b>334119</b> (2007-2011);<br><b>334118</b> (2012-2016);<br><b>334417</b> (2007-2016);<br><b>334220</b> (2007-2016);<br><b>335931</b> (2007, 2012-2016);<br><b>33593</b> (2008-2011)                                |                                                                                                                                                                                                                                                                                                                                                         |                      |            |
| Energy                               | Power generation turbine components (beryllium alloys), oil and gas drill string equipment (beryllium alloys), neutron moderator in nuclear reactors (beryllium metal), X-ray windows on oil and gas exploration sensors (beryllium metal), photovoltaic solar power generation (beryllium oxide) | <b>333132</b> (2007, 2012-2016);<br><b>33313</b> (2008-2011);<br><b>334516</b> (2007-2016);<br><b>335999</b> (2007-2016)<br><b>325188</b> (2007-2011);<br><b>325180</b> (2012-2016)                                                                                             |                                                                                                                                                                                                                                                                                                                                                         |                      |            |
| Industrial components and other uses | Plastic injection molds and tooling (beryllium alloys), fire sprinkler components (beryllium alloys), resistance welding apparatus (beryllium alloys), non-sparking tools (beryllium alloys)                                                                                                      | <b>332213</b> (2007);<br><b>33221</b> (2008-2011);<br><b>332216</b> (2012-2016);<br><b>333220</b> (2007-2011);<br><b>333249</b> (2012-2016);<br><b>333511</b> (2007-2016);<br><b>333999</b> (2007, 2012-2016);<br><b>33399</b> (2008-2011);<br><b>334290</b> (2007-2016)        |                                                                                                                                                                                                                                                                                                                                                         |                      |            |
| Medical                              | X-ray windows in medical imaging (beryllium metal), catheter wire (beryllium alloys), medical lasers (beryllium oxide), contacts in surgical instruments and pacemaker leads (beryllium alloys)                                                                                                   | <b>334510</b> (2007-2016);<br><b>334517</b> (2007-2016);<br><b>339112</b> (2007-2016)                                                                                                                                                                                           |                                                                                                                                                                                                                                                                                                                                                         |                      |            |
| Telecommunication                    | Undersea cable repeater housings (beryllium alloys), Global Positioning Systems (beryllium alloys), subsea seismic monitoring systems (beryllium alloys), semiconductor chip packaging for wireless infrastructure (beryllium oxide)                                                              | <b>334220</b> (2007-2016);<br><b>334413</b> (2007-2016);<br><b>334519</b> (2007-2016);<br><b>335929</b> (2007, 2012-2016);<br><b>33592</b> (2008-2011)                                                                                                                          |                                                                                                                                                                                                                                                                                                                                                         |                      |            |
| Bismuth                              | Chemicals                                                                                                                                                                                                                                                                                         | Bismuth use in various chemicals, cosmetics, paints, and pharmaceuticals                                                                                                                                                                                                        | <b>325188</b> (2007-2011);<br><b>325180</b> (2012-2016);                                                                                                                                                                                                                                                                                                |                      |            |



| Commodity | Application category                  | Application description                                                                                                                                                                                                                                                                                                                                    | Associated NAICS codes<br>(applicable years)                                                                                                                                                                                                                                                                                                                                                                                                                                                                                                                                                                                                                                                                                                                            | U.S. demand fraction                                                                                                                          |                |
|-----------|---------------------------------------|------------------------------------------------------------------------------------------------------------------------------------------------------------------------------------------------------------------------------------------------------------------------------------------------------------------------------------------------------------|-------------------------------------------------------------------------------------------------------------------------------------------------------------------------------------------------------------------------------------------------------------------------------------------------------------------------------------------------------------------------------------------------------------------------------------------------------------------------------------------------------------------------------------------------------------------------------------------------------------------------------------------------------------------------------------------------------------------------------------------------------------------------|-----------------------------------------------------------------------------------------------------------------------------------------------|----------------|
|           |                                       |                                                                                                                                                                                                                                                                                                                                                            |                                                                                                                                                                                                                                                                                                                                                                                                                                                                                                                                                                                                                                                                                                                                                                         | Notes                                                                                                                                         | References     |
|           |                                       |                                                                                                                                                                                                                                                                                                                                                            | <b>325411</b> (2007-2016);<br><b>325412</b> (2007-2016);<br><b>325510</b> (2007-2016);<br><b>325620</b> (2007-2016)                                                                                                                                                                                                                                                                                                                                                                                                                                                                                                                                                                                                                                                     | consumption of bismuth by category as reported by the references.                                                                             |                |
|           | Bismuth alloys                        | Fusible alloys for fuel tank safety plugs, fire sprinkler triggering fire control system, solders, holders for optical lenses and other articles for machining and grinding                                                                                                                                                                                | <b>331491</b> (2007, 2012-2016);<br><b>33149</b> (2008-2011);<br><b>333298</b> (2007);<br><b>33329</b> (2008-2011);<br><b>333249</b> (2012-2016);<br><b>333999</b> (2007, 2012-2016);<br><b>33399</b> (2008-2011);                                                                                                                                                                                                                                                                                                                                                                                                                                                                                                                                                      |                                                                                                                                               |                |
|           | Metallurgical additive and other uses | Metallurgical additive to aluminum and copper alloys, and steel to improve machinability and to cast iron to improve metal integrity. Other uses include lead-free pipe fittings and fixtures, water meters, rubber vulcanizations, semiconductors and other electronics, ammunition, ceramic glazes, food processing equipment, lubricating greases, etc. | <b>324191</b> (2007-2016);<br><b>325212</b> (2007-2016);<br><b>327122</b> (2007-2011);<br><b>327120</b> (2012-2016);<br><b>331111</b> (2007);<br><b>33111</b> (2008-2011);<br><b>331110</b> (2012-2016);<br><b>331312</b> (2007-2011);<br><b>331313</b> (2012-2016);<br><b>331511</b> (2007, 2012-2016);<br><b>33151</b> (2007-2011);<br><b>332323</b> (2007, 2012-2016);<br><b>33232</b> (2008-2011);<br><b>332992</b> (2007-2016);<br><b>332996</b> (2007-2016);<br><b>333294</b> (2007);<br><b>33329</b> (2008-2011);<br><b>333241</b> (2012-2016);<br><b>334413</b> (2007-2016);<br><b>334419</b> (2007-2016);<br><b>334514</b> (2007-2016);<br><b>334517</b> (2007-2016);<br><b>335311</b> (2007-2016);<br><b>335313</b> (2007-2016);<br><b>335314</b> (2007-2016) |                                                                                                                                               |                |
| Cadmium   | Batteries                             | Rechargeable (e.g., nickel-cadmium, silver-cadmium, and mercury-cadmium) batteries, which are used to power various industrial applications and consumer electronics (e.g., power tools)                                                                                                                                                                   | <b>335911</b> (2007-2016)                                                                                                                                                                                                                                                                                                                                                                                                                                                                                                                                                                                                                                                                                                                                               | Representative statistics for U.S. demand fractions are not available. All applications are grouped into a single category with a 100% share. | Not applicable |
|           | Coatings and plating                  | Anticorrosive coatings on iron, steel, brass, and aluminum used in the electronics, automotive, aerospace and military applications, especially in marine and alkaline environments                                                                                                                                                                        | <b>332812</b> (2007, 2012-2016);<br><b>332813</b> (2007, 2012-2016);<br><b>33281</b> (2008-2011)                                                                                                                                                                                                                                                                                                                                                                                                                                                                                                                                                                                                                                                                        |                                                                                                                                               |                |
|           | Pigments                              | Inorganic cadmium sulfide pigments that provide a yellow color                                                                                                                                                                                                                                                                                             | <b>325131</b> (2007);<br><b>32513</b> (2008-2011);<br><b>325130</b> (20120-2016)                                                                                                                                                                                                                                                                                                                                                                                                                                                                                                                                                                                                                                                                                        |                                                                                                                                               |                |

| Commodity | Application category   | Application description                                                                                                                                                                                                             | Associated NAICS codes<br>(applicable years)                                                                                                                                                                                                                                                                    | U.S. demand fraction                                                          |            |
|-----------|------------------------|-------------------------------------------------------------------------------------------------------------------------------------------------------------------------------------------------------------------------------------|-----------------------------------------------------------------------------------------------------------------------------------------------------------------------------------------------------------------------------------------------------------------------------------------------------------------|-------------------------------------------------------------------------------|------------|
|           |                        |                                                                                                                                                                                                                                     |                                                                                                                                                                                                                                                                                                                 | Notes                                                                         | References |
|           | Plastic stabilizers    | Stabilizer for polyvinylchloride (PVC)                                                                                                                                                                                              | 325211 (2007-2016)                                                                                                                                                                                                                                                                                              |                                                                               |            |
|           | Nonferrous alloys      | Additive to nonferrous alloys                                                                                                                                                                                                       | 331492 (2007, 2012-2016);<br>33149 (2008-2011)                                                                                                                                                                                                                                                                  |                                                                               |            |
|           | Photovoltaic devices   | Cadmium telluride thin-film solar cells                                                                                                                                                                                             | 334413 (2007-2016)                                                                                                                                                                                                                                                                                              |                                                                               |            |
|           | Others                 | Various uses including as catalysts for production of alcohols and esters                                                                                                                                                           | 325188 (2007-2011);<br>325180 (2012-2016)                                                                                                                                                                                                                                                                       |                                                                               |            |
| Cerium    | Batteries              | Additive to nickel-metal-hydride (NiMH) battery alloys, which are used to power portable electronics, hybrid electric vehicles, and power tools, among others                                                                       | 335911 (2007-2016);                                                                                                                                                                                                                                                                                             | See section on rare earth demand and net imports in this document for details | (565)      |
|           | Catalyst               | Catalysts used in automotive catalytic converters, as well as an additive to petroleum catalytic cracking                                                                                                                           | 324110 (2007-2016);<br>336399 (2007-2011);<br>336390 (2012-2016);<br>325110 (2007-2016)                                                                                                                                                                                                                         |                                                                               |            |
|           | Ceramics               | Stabilizing oxide in zirconia ceramics used in a variety of applications including grinding media, cutting tools, and solid oxide fuel cells                                                                                        | 327910 (2007-2016);<br>333515 (2007-2016)                                                                                                                                                                                                                                                                       |                                                                               |            |
|           | Glass                  | Additive in glass production for decolorizing and stabilizing                                                                                                                                                                       | 327212 (2007-2016)                                                                                                                                                                                                                                                                                              |                                                                               |            |
|           | Metallurgy             | Mischmetal and rare-earth silicide used as an additive to steel and iron, as well as other metallurgical applications including aluminum and magnesium alloys (565)                                                                 | 331111 (2007);<br>331112 (2007);<br>33111 (2008-11);<br>331110 (2012-2016);<br>336999 (2007-2016);<br>339999 (2007-2016)                                                                                                                                                                                        |                                                                               |            |
|           | Phosphors and pigments | Cerium oxide as an opacified for ceramic tiles, as well as cerium's use in phosphors for light-emitting diodes                                                                                                                      | 325131 (2007);<br>32513 (2008-2011);<br>325130 (2012-2016);<br>335110 (2007-2016);<br>334220 (2007-2016);<br>334111 (2007-2016);<br>334119 (2007-2009);<br>33411 (2008-2011);<br>334118 (2012-2016);<br>334210 (2007, 2009-2016);<br>3342 (2008);<br>336321 (2007);<br>3362 (2008-2011);<br>336320 (2012-2016); |                                                                               |            |
|           | Polishing              | Polishing powders to create finished surface of glass and electrical components including flat glass, optical glass, liquid crystal displays, silicon wafer surfaces for integrated circuits, glass hard discs, among others (566). | 334413 (2007-2016);<br>339115 (2007-2016)                                                                                                                                                                                                                                                                       |                                                                               |            |
|           | Other                  | Various uses included food supplement and fertilizer additive, additive to paints and coatings, stabilizer for polyvinyl chloride (PVC), and single crystals for medical imaging (positron emission tomography)                     | 334511 (2007-2016);<br>325411 (2007-2016);<br>325510 (2007-2016);                                                                                                                                                                                                                                               |                                                                               |            |

| Commodity | Application category | Application description                                                                                                                                                                                                                                       | Associated NAICS codes<br>(applicable years)                                                                                                                                                                                                                                                                                                                                                                                                                                                                                               | U.S. demand fraction                                                                                |                    |
|-----------|----------------------|---------------------------------------------------------------------------------------------------------------------------------------------------------------------------------------------------------------------------------------------------------------|--------------------------------------------------------------------------------------------------------------------------------------------------------------------------------------------------------------------------------------------------------------------------------------------------------------------------------------------------------------------------------------------------------------------------------------------------------------------------------------------------------------------------------------------|-----------------------------------------------------------------------------------------------------|--------------------|
|           |                      |                                                                                                                                                                                                                                                               |                                                                                                                                                                                                                                                                                                                                                                                                                                                                                                                                            | Notes                                                                                               | References         |
|           |                      |                                                                                                                                                                                                                                                               | 325211 (2007-2016)                                                                                                                                                                                                                                                                                                                                                                                                                                                                                                                         |                                                                                                     |                    |
| Chromium  | Steels               | Additive to steels, mainly stainless steels, to provide hardness and corrosion resistance, especially at elevated temperatures                                                                                                                                | 331111 (2007);<br>331111 (2008-2011);<br>331110 (2012-2016);<br>331210 (2007-2016);<br>331512 (2007, 2012-2016);<br>331513 (2007, 2012-2016);<br>33151 (2008-2011);<br>331221 (2007, 2012-2016);<br>331222 (2007, 2012-2016);<br>33122 (2008-2011);<br>332111 (2007, 2012-2016);<br>332114 (2007, 2012-2016);<br>33211 (2008-2011);<br>332214 (2007);<br>332215 (2012);<br>33221 (2008-2011, 2013-2016);<br>332912 (2007, 2012-2016);<br>332919 (2007, 2012-2016);<br>33291 (2008-2011);<br>332999 (2007, 2012-2016);<br>33299 (2008-2011) | Demand fractions are based on U.S. consumption of chromium by end-use as reported by the references | (143-148, 512-514) |
|           | Superalloys          | Additive to high-performance alloys mainly used in aircraft and land-based turbine engine parts                                                                                                                                                               | 331492 (2007, 2012-2016);<br>33149 (2008-2011);<br>332117 (2007-2016);<br>333611 (2007-2016);<br>336412 (2007-2016)                                                                                                                                                                                                                                                                                                                                                                                                                        |                                                                                                     |                    |
|           | Other                | Other uses included metal finishing (e.g., electroplating), abrasives, magnetic storage media, dental alloys, batteries, and chromium chemicals used in pigments, leather tanning, wood preservation, animal feed supplement, and catalysts, among other uses | 311119 (2007-2016);<br>316110 (2007-2016);<br>321114 (2007, 2012-2016);<br>32111 (2008-2011);<br>325131 (2007);<br>32513 (2008-2011);<br>325130 (2012-2016);<br>325188 (2007-2011);<br>325180 (2012-2016);<br>327910 (2007-2016);<br>331314 (2007-2016);<br>332812 (2007, 2012-2016);<br>332813 (2007, 2012-2016);<br>33281 (2008-2011);<br>334613 (2007-2010, 2012);<br>33461 (2011, 2013-2016)<br>335912 (2007-2016);<br>339114 (2007-2016);                                                                                             |                                                                                                     |                    |

| Commodity       | Application category    | Application description                                                                                                                                                                                                                                                                                                                                                                                                                                                                                                | Associated NAICS codes<br>(applicable years)                                                                                                                                                                                                                                                                                                                                                                                               | U.S. demand fraction                                                                                                                               |                |
|-----------------|-------------------------|------------------------------------------------------------------------------------------------------------------------------------------------------------------------------------------------------------------------------------------------------------------------------------------------------------------------------------------------------------------------------------------------------------------------------------------------------------------------------------------------------------------------|--------------------------------------------------------------------------------------------------------------------------------------------------------------------------------------------------------------------------------------------------------------------------------------------------------------------------------------------------------------------------------------------------------------------------------------------|----------------------------------------------------------------------------------------------------------------------------------------------------|----------------|
|                 |                         |                                                                                                                                                                                                                                                                                                                                                                                                                                                                                                                        |                                                                                                                                                                                                                                                                                                                                                                                                                                            | Notes                                                                                                                                              | References     |
|                 |                         |                                                                                                                                                                                                                                                                                                                                                                                                                                                                                                                        | <b>339116</b> (2007-2016)                                                                                                                                                                                                                                                                                                                                                                                                                  |                                                                                                                                                    |                |
| Cobalt mine     | Cobalt refining         | The United States did not refine cobalt from primary sources during the entire time period of analysis (2007-2016) (150-155).                                                                                                                                                                                                                                                                                                                                                                                          | <b>Not applicable</b>                                                                                                                                                                                                                                                                                                                                                                                                                      | Not applicable                                                                                                                                     | Not applicable |
| Cobalt refinery | Cemented carbides       | Cemented carbides used in cutting and drilling tools used by the mining, construction, automotive, and aerospace sectors                                                                                                                                                                                                                                                                                                                                                                                               | <b>333131</b> (2007, 2012-2016);<br><b>333132</b> (2007, 2012-2016);<br><b>33313</b> (2008-2011);<br><b>333511</b> (2007-2016);<br><b>333514</b> (2007-2016);<br><b>333515</b> (2007-2016);<br><b>332213</b> (2007);<br><b>33221</b> (2008-2011);<br><b>332216</b> (2012-216)                                                                                                                                                              | Demand fractions are based on reported consumption by application. Note that reported consumption totals do not always equal apparent consumption. | (150-155)      |
|                 | Chemical and ceramics   | Catalysts used in the chemical industry (e.g., in the synthesis of terephthalic acid and di-methyl terephthalate as precursors for polyester, in the hydroformylation or oxo process for production of aldehydes from alkenes) and the petroleum industry (e.g., desulfurization) (567); driers for inks and paints; pigments and decolorizers in glass and ceramics; surface finishing; cathode in rechargeable batteries used in consumer electronics and hybrid and electric vehicles; and other miscellaneous uses | <b>325199</b> (2007, 2012-2016);<br><b>32519</b> (2008-2011);<br><b>325188</b> (2007-2011);<br><b>325180</b> (2012-2016);<br><b>324110</b> (2007-2016);<br><b>325131</b> (2007);<br><b>32513</b> (2008-2011);<br><b>325130</b> (2012-2016);<br><b>325510</b> (2007-2016);<br><b>325910</b> (2007-2016);<br><b>332812</b> (2007, 2012-2016);<br><b>332813</b> (2007, 2012-2016);<br><b>33281</b> (2008-2011);<br><b>335911</b> (2007-2016); |                                                                                                                                                    |                |
|                 | Magnetic alloys         | Aluminum-nickel-cobalt, samarium-cobalt, coating on neodymium-iron-boron, as well as soft magnet alloys used in a wide range of applications including hard disk drives, sensors, actuators, and magnetic resonance imaging (567).                                                                                                                                                                                                                                                                                     | <b>334112</b> (2007-2016);<br><b>334510</b> (2007-2016);<br><b>335312</b> (2007-2016);<br><b>334613</b> (2007-2010, 2012);<br><b>33461</b> (2011, 2013-2016)<br><b>332999</b> (2007, 2012-2016);<br><b>33299</b> (2008-2011)                                                                                                                                                                                                               |                                                                                                                                                    |                |
|                 | Steels and other alloys | Additive to various steels and other alloys used for wear- and corrosion-resistances and strength (e.g., maraging steel) in chemical manufacturing equipment, medical (e.g., prosthetics) and dental applications                                                                                                                                                                                                                                                                                                      | <b>331111</b> (2007);<br><b>33111</b> (2008-2011);<br><b>331110</b> (2012-2016);<br><b>331512</b> (2007, 2012-2016);<br><b>33151</b> (2008-2011);<br><b>332111</b> (2007, 2012-2016);<br><b>33211</b> (2008-2011);<br><b>332410</b> (2007-2016);<br><b>339113</b> (2007-2016);<br><b>339114</b> (2007-2016);<br><b>339116</b> (2007-2016)                                                                                                  |                                                                                                                                                    |                |
|                 | Superalloys             | Additive to high-performance alloys mainly used in aircraft and land-                                                                                                                                                                                                                                                                                                                                                                                                                                                  | <b>331492</b> (2007, 2012-2016);                                                                                                                                                                                                                                                                                                                                                                                                           |                                                                                                                                                    |                |

| Commodity       | Application category          | Application description                                                                                                                                                  | Associated NAICS codes<br>(applicable years)                                                                                                                                                                                                                                                                                                                                                                                                                                                                                                                                                                                                                                                                        | U.S. demand fraction                                                                 |                |
|-----------------|-------------------------------|--------------------------------------------------------------------------------------------------------------------------------------------------------------------------|---------------------------------------------------------------------------------------------------------------------------------------------------------------------------------------------------------------------------------------------------------------------------------------------------------------------------------------------------------------------------------------------------------------------------------------------------------------------------------------------------------------------------------------------------------------------------------------------------------------------------------------------------------------------------------------------------------------------|--------------------------------------------------------------------------------------|----------------|
|                 |                               |                                                                                                                                                                          |                                                                                                                                                                                                                                                                                                                                                                                                                                                                                                                                                                                                                                                                                                                     | Notes                                                                                | References     |
|                 |                               | based turbine engine parts                                                                                                                                               | <b>33149</b> (2008-2011);<br><b>332117</b> (2007-2016);<br><b>333611</b> (2007-2016);<br><b>336412</b> (2007-2016)                                                                                                                                                                                                                                                                                                                                                                                                                                                                                                                                                                                                  |                                                                                      |                |
| Copper mine     | Copper smelting and refining  | Primary feed into copper smelters and refineries                                                                                                                         | <b>331</b> (2007);<br><b>33141</b> (2008-2011);<br><b>331410</b> (2012-2016)                                                                                                                                                                                                                                                                                                                                                                                                                                                                                                                                                                                                                                        | All copper concentrates are assumed to be consumed by copper smelters and refineries | Not applicable |
| Copper refinery | Building construction         | Building wire, plumbing and heating, air conditioning and commercial refrigeration, builders' hardware, and architectural uses (568)                                     | <b>332311</b> (2007, 2012-2016);<br><b>332312</b> (2007, 2012-2016);<br><b>332313</b> (2007, 2012-2016);<br><b>33231</b> (2008-2011);<br><b>332321</b> (2007, 2012-2016);<br><b>332322</b> (2007, 2012-2016);<br><b>332323</b> (2007, 2012-2016);<br><b>33232</b> (2008-2011);<br><b>332510</b> (2007-2016);<br><b>332611</b> (2007);<br><b>332612</b> (2007);<br><b>332613</b> (2012-2016);<br><b>332618</b> (2007, 2012-2016);<br><b>33261</b> (2008-2011);<br><b>332913</b> (2007, 2012-2016);<br><b>332996</b> (2007-2016);<br><b>333411</b> (2007);<br><b>333412</b> (2007);<br><b>333413</b> (2012-2016);<br><b>333414</b> (2007, 2012-2016);<br><b>333415</b> (2007, 2012-2016);<br><b>33341</b> (2008-2011) | Demand fractions are based on mill products sold to U.S. manufacturers               | (568)          |
|                 | Consumer and general products | Appliances, cord sets, military and commercial ordnance, consumer electronics, fasteners and closures, coinage, utensils and cutlery, and other miscellaneous uses (568) | <b>332111</b> (2007, 2012-2016);<br><b>332112</b> (2007, 2012-2016);<br><b>332114</b> (2007, 2012-2016);<br><b>332115</b> (2007);<br><b>221116</b> (2007);<br><b>332117</b> (2007, 2012-2016);<br><b>332119</b> (2012-2016);<br><b>332211</b> (2007);<br><b>332212</b> (2007);<br><b>332213</b> (2007);<br><b>332215</b> (2012);<br><b>332216</b> (2012);<br><b>33221</b> (2008-2011, 2013-2016);<br><b>332710</b> (2007-2016);                                                                                                                                                                                                                                                                                     |                                                                                      |                |

| Commodity | Application category               | Application description                                                                                                         | Associated NAICS codes<br>(applicable years)                                                                                                                                                                                                                                                                                                                                                                                                                                                                                                                                                                                                                                          | U.S. demand fraction |            |
|-----------|------------------------------------|---------------------------------------------------------------------------------------------------------------------------------|---------------------------------------------------------------------------------------------------------------------------------------------------------------------------------------------------------------------------------------------------------------------------------------------------------------------------------------------------------------------------------------------------------------------------------------------------------------------------------------------------------------------------------------------------------------------------------------------------------------------------------------------------------------------------------------|----------------------|------------|
|           |                                    |                                                                                                                                 |                                                                                                                                                                                                                                                                                                                                                                                                                                                                                                                                                                                                                                                                                       | Notes                | References |
|           |                                    |                                                                                                                                 | <b>332721</b> (2007-2016);<br><b>332722</b> (2007-2016);<br><b>332811</b> (2007, 2012-2016);<br><b>332812</b> (2007, 2012-2016);<br><b>332813</b> (2007, 2012-2016);<br><b>33281</b> (2008-2011)<br><b>332991</b> (2007-2016);<br><b>332992</b> (2007-2016);<br><b>332993</b> (2007-2016);<br><b>332994</b> (2007-2016);<br><b>332999</b> (2007-2016);<br>335211 (2007);<br>335212 (2007);<br>335221 (2007);<br>335222 (2007);<br>335224 (2007);<br>335228 (2007);<br>3352 (2008-2011, 2013-2016);<br>335210 (2012);<br>339 (2007-2016)                                                                                                                                               |                      |            |
|           | Electrical and electronic products | Power utilities, telecommunication, business electronics, lighting and wiring devices (568)                                     | <b>333611</b> (2007-2016);<br><b>333612</b> (2007-2016);<br><b>333613</b> (2007-2016);<br><b>333618</b> (2007-2016);<br><b>334</b> (2007-2016);<br><b>335110</b> (2007-2016);<br><b>335121</b> (2007, 2012-2016);<br><b>335122</b> (2007, 2012-2016);<br><b>335129</b> (2007, 2012-2016);<br><b>33512</b> (2008-2016);<br><b>335311</b> (2007-2016);<br><b>335312</b> (2007-2016);<br><b>335313</b> (2007-2016);<br><b>335314</b> (2007-2016);<br><b>335921</b> (2007, 2012-2016);<br><b>335929</b> (2007, 2012-2016);<br><b>33592</b> (2008-2011);<br><b>335931</b> (2007, 2012-2016);<br><b>335932</b> (2007, 2012-2016);<br><b>33593</b> (2008-2011);<br><b>335999</b> (2007-2016) |                      |            |
|           | Industrial machinery and equipment | In-plant equipment, industrial valves and fittings, non-electrical instruments, off-highway vehicles, and heat exchangers (568) | <b>332410</b> (2007-2016);<br><b>332420</b> (2007-2016);<br><b>332431</b> (2007, 2012-2016);<br><b>332439</b> (2007, 2012-2016);<br><b>33243</b> (2008-2011);                                                                                                                                                                                                                                                                                                                                                                                                                                                                                                                         |                      |            |

| Commodity | Application category | Application description | Associated NAICS codes<br>(applicable years)                                                                                                                                                                                                                                                                                                                                                                                                                                                                                                                                                                                                                                                                                                                                                                                                                                                                                                                                                                                                                                                                                                                                                                                                                                                                                                                                                                                                          | U.S. demand fraction |            |
|-----------|----------------------|-------------------------|-------------------------------------------------------------------------------------------------------------------------------------------------------------------------------------------------------------------------------------------------------------------------------------------------------------------------------------------------------------------------------------------------------------------------------------------------------------------------------------------------------------------------------------------------------------------------------------------------------------------------------------------------------------------------------------------------------------------------------------------------------------------------------------------------------------------------------------------------------------------------------------------------------------------------------------------------------------------------------------------------------------------------------------------------------------------------------------------------------------------------------------------------------------------------------------------------------------------------------------------------------------------------------------------------------------------------------------------------------------------------------------------------------------------------------------------------------|----------------------|------------|
|           |                      |                         |                                                                                                                                                                                                                                                                                                                                                                                                                                                                                                                                                                                                                                                                                                                                                                                                                                                                                                                                                                                                                                                                                                                                                                                                                                                                                                                                                                                                                                                       | Notes                | References |
|           |                      |                         | <b>332911</b> (2007, 2012-2016);<br><b>332912</b> (2007, 2012-2016);<br><b>332919</b> (2007, 2012-2016);<br><b>33291</b> (2008-2011);<br><b>333111</b> (2007-2016);<br><b>333112</b> (2007-2016);<br><b>333120</b> (2007-2016);<br><b>333131</b> (2007, 2012-2016);<br><b>333132</b> (2007, 2012-2016);<br><b>33313</b> (2008-2012);<br><b>333210</b> (2007-2011);<br><b>333220</b> (2007-2011);<br><b>333291</b> (2007);<br><b>333292</b> (2007);<br><b>333293</b> (2007);<br><b>333294</b> (2007);<br><b>333295</b> (2007);<br><b>333298</b> (2007);<br><b>33329</b> (2008-2011);<br><b>333241</b> (20012-2016);<br><b>333242</b> (20012-2016);<br><b>333243</b> (20012-2016);<br><b>333244</b> (20012-2016);<br><b>333249</b> (20012-2016);<br><b>333314</b> (2007, 2012-2016);<br><b>333315</b> (2007);<br><b>333319</b> (2007);<br><b>333316</b> (2012-2016);<br><b>333319</b> (20212-2016);<br><b>33331</b> (2008-2011);<br><b>333511</b> (2007-2016);<br><b>333512</b> (2007-2011);<br><b>333513</b> (2007-2011);<br><b>333514</b> (2007-2016);<br><b>333515</b> (2012-2016);<br><b>333516</b> (2007-2011);<br><b>333517</b> (2012-2016);<br><b>333518</b> (2007-2011);<br><b>333519</b> (2012-2016);<br><b>333912</b> (2007-2016);<br><b>333914</b> (2007-2016);<br><b>333921</b> (2007, 2012-2016);<br><b>333922</b> (2007, 2012-2016);<br><b>333923</b> (2007, 2012-2016);<br><b>333924</b> (2007, 2012-2016);<br><b>33392</b> (2008-2011); |                      |            |

| Commodity      | Application category     | Application description                                                                                                                                                                                               | Associated NAICS codes<br>(applicable years)                                                                                                                                                                                                                                                                                                                                                                                                                                | U.S. demand fraction                                                                                |                    |
|----------------|--------------------------|-----------------------------------------------------------------------------------------------------------------------------------------------------------------------------------------------------------------------|-----------------------------------------------------------------------------------------------------------------------------------------------------------------------------------------------------------------------------------------------------------------------------------------------------------------------------------------------------------------------------------------------------------------------------------------------------------------------------|-----------------------------------------------------------------------------------------------------|--------------------|
|                |                          |                                                                                                                                                                                                                       |                                                                                                                                                                                                                                                                                                                                                                                                                                                                             | Notes                                                                                               | References         |
|                |                          |                                                                                                                                                                                                                       | <b>333991</b> (2007, 2012-2016);<br><b>333992</b> (2007, 2012-2016);<br><b>333993</b> (2007, 2012-2016);<br><b>333994</b> (2007, 2012-2016);<br><b>333995</b> (2007, 2012-2016);<br><b>333996</b> (2007, 2012-2016);<br><b>333997</b> (2007, 2012-2016);<br><b>333999</b> (2007, 2012-2016);<br><b>33399</b> (2008-2011)                                                                                                                                                    |                                                                                                     |                    |
|                | Transportation equipment | Automobiles, trucks and buses, railroad, marine, and aircraft and aerospace applications (568)                                                                                                                        | <b>336</b> (2007-2016)                                                                                                                                                                                                                                                                                                                                                                                                                                                      |                                                                                                     |                    |
| Copper smelter | Copper refining          | Primary feed into copper refineries                                                                                                                                                                                   | <b>331</b> (2007);<br><b>33141</b> (2008-2011);<br><b>331410</b> (2012-2016)                                                                                                                                                                                                                                                                                                                                                                                                | All copper smelter production is assumed to feed into copper refineries                             | Not applicable     |
| Dysprosium     | Magnets                  | Additive to neodymium-iron-boron permanent magnets to increase coercivity (resistance to demagnetization)                                                                                                             | <b>335312</b> (2015, 2016);<br><b>334112</b> (2015, 2016);<br><b>333611</b> (2015, 2016);<br><b>336330</b> (2015, 2016);<br><b>334210</b> (2015, 2016);<br><b>336350</b> (2015, 2016);<br><b>333415</b> (2015, 2016);<br><b>336991</b> (2015, 2016);<br><b>333249</b> (2015, 2016);<br><b>334510</b> (2015, 2016);<br><b>333912</b> (2015, 2016);<br><b>333993</b> (2015, 2016);<br><b>335314</b> (2015, 2016);<br><b>33522</b> (2015, 2016);<br><b>336510</b> (2015, 2016) | See section on rare earth demand and net imports in this document for details                       | (565)              |
| Feldspar       | Glass                    | Glassmaking including container glass, fiberglass, and other glass to improve hardness, durability, and resistance to chemical corrosion (569)                                                                        | <b>327211</b> (2007-2016);<br><b>327212</b> (2007-2016);<br><b>327213</b> (2007-2016);<br><b>327215</b> (2007-2016);                                                                                                                                                                                                                                                                                                                                                        | Demand fractions are based on estimates of feldspar sold or used by producers in the United States. | (163–168, 570–572) |
|                | Other                    | Fluxes for ceramics and pottery (electrical insulators, sanitaryware, tableware, and tile), as well as other miscellaneous uses (abrasives, enamel, as well as fillers and extenders for paints, plastics and rubber) | <b>327111</b> (2007);<br><b>327112</b> (2007);<br><b>327113</b> (2007);<br><b>32711</b> (2008-2011);<br><b>327110</b> (2012-2016);<br><b>327122</b> (2007);<br><b>32712</b> (2008-2011);<br><b>327120</b> (2012-2016);<br><b>327992</b> (2007-2016);<br><b>325510</b> (2007-2016);                                                                                                                                                                                          |                                                                                                     |                    |



| Commodity | Application category      | Application description                                                                                                                                          | Associated NAICS codes<br>(applicable years)                                                                                                                                                                                             | U.S. demand fraction                                                                                 |                         |
|-----------|---------------------------|------------------------------------------------------------------------------------------------------------------------------------------------------------------|------------------------------------------------------------------------------------------------------------------------------------------------------------------------------------------------------------------------------------------|------------------------------------------------------------------------------------------------------|-------------------------|
|           |                           |                                                                                                                                                                  |                                                                                                                                                                                                                                          | Notes                                                                                                | References              |
|           |                           |                                                                                                                                                                  | <b>326199</b> (2007, 2012-2016);<br><b>32619</b> (2008-2011);<br><b>326299</b> (2007, 2012-2016);<br><b>32629</b> (2008-2011)                                                                                                            |                                                                                                      |                         |
| Gallium   | Optoelectronic devices    | Laser diodes and light-emitting diodes; photodetectors and solar cells                                                                                           | <b>334413</b> (2007-2016)                                                                                                                                                                                                                | Demand fractions are based on U.S. consumption of gallium metal and gallium compounds                | (169, 521-528)          |
|           | Integrated circuits       | Analog and digital integrated circuits                                                                                                                           |                                                                                                                                                                                                                                          |                                                                                                      |                         |
|           | Other                     | Other uses including research and development                                                                                                                    |                                                                                                                                                                                                                                          |                                                                                                      |                         |
| Germanium | Infrared optics           | Lenses and windows for infrared optical systems in night-vision equipment, mainly for military use, but also for both commercial and consumer applications (172) | <b>333314</b> (2007-2016);<br><b>334511</b> (2007-2016);<br><b>334513</b> (2007-2016);<br><b>334516</b> (2007-2016)                                                                                                                      | Demand fractions are based on estimated U.S. consumption by application                              | (118-123, 198-200, 573) |
|           | Fiber optics              | Germanium dioxide as a dopant in silica glass for fiber optical fibers used in networks for digital data transmission (172)                                      | <b>335921</b> (2007, 2012-2016);<br><b>33592</b> (2008-2011)                                                                                                                                                                             |                                                                                                      |                         |
|           | Electronics and solar     | Semiconductor and solar photovoltaic applications, especially space applications                                                                                 | <b>334413</b> (2007-2016);<br><b>334419</b> (2007-2016)                                                                                                                                                                                  |                                                                                                      |                         |
|           | Other                     | Includes phosphors, metallurgy, chemotherapy, and polymerization catalysts (for polyethylene terephthalate resins)                                               | <b>335110</b> (2007-2016);<br><b>331</b> (2007);<br><b>33141</b> (2008-2011);<br><b>331410</b> (2012-2016);<br><b>331492</b> (2007, 2012-2016);<br><b>33149</b> (2008-2011);<br><b>334517</b> (2007-2016);<br><b>325211</b> (2007-2016); |                                                                                                      |                         |
| Gold      | Jewelry and coins         | Fabrication metal and alloying element in jewelry and coins                                                                                                      | <b>339911</b> (2007);<br><b>339912</b> (2007);<br><b>339913</b> (2007);<br><b>339914</b> (2007);<br><b>33991</b> (2008-2011);<br><b>339910</b> (2012-2016)                                                                               | Demand fractions are based on North American consumption by application as reported by the reference | (574)                   |
|           | Electrical and electronic | Gold used in various electrical and electronic applications to provide electrical conductivity and corrosion resistance                                          | <b>334412</b> (2007-2016);<br><b>334413</b> (2007-2016);<br><b>334416</b> (2007-2016);<br><b>334417</b> (2007-2016);<br><b>334418</b> (2007-2016);<br><b>334419</b> (2007-2016);<br><b>334519</b> (2007-2016);                           |                                                                                                      |                         |
|           | Dental                    | Dental alloys                                                                                                                                                    | <b>339114</b> (2007-2016);<br><b>339116</b> (2007-2016)                                                                                                                                                                                  |                                                                                                      |                         |
|           | Other                     | Various uses including as a catalyst, in glass making, aerospace for both electronics and lubrication, and medicines and surgical instruments, to name a few     | <b>325188</b> (2007-2011);<br><b>325180</b> (2012-2016);<br><b>325910</b> (2007-2016);<br><b>325412</b> (2007-2016);<br><b>327211</b> (2007-2016);                                                                                       |                                                                                                      |                         |

| Commodity | Application category | Application description                                                                                                                                                                                                                                                                                                                               | Associated NAICS codes<br>(applicable years)                                                                                                                                                                                                                                                                                                   | U.S. demand fraction                                                                                                                                                                                                                       |                    |
|-----------|----------------------|-------------------------------------------------------------------------------------------------------------------------------------------------------------------------------------------------------------------------------------------------------------------------------------------------------------------------------------------------------|------------------------------------------------------------------------------------------------------------------------------------------------------------------------------------------------------------------------------------------------------------------------------------------------------------------------------------------------|--------------------------------------------------------------------------------------------------------------------------------------------------------------------------------------------------------------------------------------------|--------------------|
|           |                      |                                                                                                                                                                                                                                                                                                                                                       |                                                                                                                                                                                                                                                                                                                                                | Notes                                                                                                                                                                                                                                      | References         |
|           |                      |                                                                                                                                                                                                                                                                                                                                                       | <b>327212</b> (2007-2016);<br><b>336322</b> (2007);<br><b>33632</b> (2008-2011);<br><b>336320</b> (2012-2016);<br><b>336414</b> (2007-2012);<br><b>33641</b> (2013-2016)<br><b>339112</b> (2007-2016)                                                                                                                                          |                                                                                                                                                                                                                                            |                    |
| Graphite  | Brake lining         | Used in brake and clutch linings to improve friction coefficient for braking comfort and noise reduction (575)                                                                                                                                                                                                                                        | <b>336340</b> (2007-2016)                                                                                                                                                                                                                                                                                                                      | Demand fractions are based on U.S. consumption of natural graphite as reported by the references. Data for certain applications for certain years are withheld to avoid disclosing company proprietary data but included in this analysis. | (191–196, 576–578) |
|           | Carbon products      | Mainly used for bearings and carbon brushes                                                                                                                                                                                                                                                                                                           | <b>333613</b> (2007-2016);<br><b>335991</b> (2007-2016);<br><b>332991</b> (2007-2016)                                                                                                                                                                                                                                                          |                                                                                                                                                                                                                                            |                    |
|           | Foundries            | Additive to foundry facing sand, as a mound wash lubricant, and as permanent mound material (197)                                                                                                                                                                                                                                                     | <b>331511</b> (2007, 2012-2016);<br><b>33151</b> (2008-2011);<br><b>331513</b> (2007-2016)                                                                                                                                                                                                                                                     |                                                                                                                                                                                                                                            |                    |
|           | Lubricants           | Various graphite lubricants used for forging metal parts, greases, and other lubrication needs for plant and equipment (197); also includes ammunition packings and seed coating (191)                                                                                                                                                                | <b>339991</b> (2007-2016);<br><b>332992</b> (2007-2016);<br><b>325320</b> (2007-2016);<br><b>332111</b> (2007, 2012-2016);<br><b>332112</b> (2007, 2012-2016);<br><b>33211</b> (2008-2011)                                                                                                                                                     |                                                                                                                                                                                                                                            |                    |
|           | Powdered metals      | Mainly used in the production of powder metal structural parts (197)                                                                                                                                                                                                                                                                                  | <b>332117</b> (2007-2016);<br><b>327992</b> (2007-2016)                                                                                                                                                                                                                                                                                        |                                                                                                                                                                                                                                            |                    |
|           | Refractories         | Additives to refractory materials for high-temperature applications                                                                                                                                                                                                                                                                                   | <b>327124</b> (2007);<br><b>327125</b> (2007);<br><b>32712</b> (2008-2011);<br><b>327120</b> (2012-2016)                                                                                                                                                                                                                                       |                                                                                                                                                                                                                                            |                    |
|           | Rubber               | Additive to rubbers to improve thermal and/or electrical conductivity of rubbers (197)                                                                                                                                                                                                                                                                | <b>326291</b> (2007, 2012-2016);<br><b>326299</b> (2007, 2012-2016);<br><b>32629</b> (2008-2011)                                                                                                                                                                                                                                               |                                                                                                                                                                                                                                            |                    |
|           | Other                | “Includes antiknock gasoline additives and other compounds, batteries, crucibles, drilling mud, electrical and electronic devices, industrial diamond, magnetic tape, mechanical products, nozzles, paints and polishes, pencils, retorts, sleeves, small packages, soldering and welding, steelmaking, stoppers, and other end-use categories” (191) | <b>325998</b> (2007, 2012-2016);<br><b>32599</b> (2008-2011);<br><b>325510</b> (2007-2016);<br><b>327999</b> (2007-2016);<br><b>334613</b> (2007-2010, 2012)<br><b>33416</b> (2011, 2013-2016);<br><b>339942</b> (2007);<br><b>33994</b> (2008-2011);<br><b>339940</b> (2012-2016);<br><b>335911</b> (2007-2016);<br><b>335912</b> (2007-2016) |                                                                                                                                                                                                                                            |                    |

| Commodity | Application category           | Application description                                                                                                                                                                                                                                                                                                                                                                                                                                                                | Associated NAICS codes (applicable years)                                                                                 | U.S. demand fraction                                                                                                                                                                                                                                                                                                                      |                |
|-----------|--------------------------------|----------------------------------------------------------------------------------------------------------------------------------------------------------------------------------------------------------------------------------------------------------------------------------------------------------------------------------------------------------------------------------------------------------------------------------------------------------------------------------------|---------------------------------------------------------------------------------------------------------------------------|-------------------------------------------------------------------------------------------------------------------------------------------------------------------------------------------------------------------------------------------------------------------------------------------------------------------------------------------|----------------|
|           |                                |                                                                                                                                                                                                                                                                                                                                                                                                                                                                                        |                                                                                                                           | Notes                                                                                                                                                                                                                                                                                                                                     | References     |
| Helium    | Controlled atmospheres         | Helium's used in optical fiber manufacturer and semiconductor processing (579)                                                                                                                                                                                                                                                                                                                                                                                                         | 335921 (2007, 2012-2016);<br>33592 (2008-2011);<br>334413 (2007-2016)                                                     | Demand fractions are based on estimated helium consumption in the United States by application. For years 2015-2016, the end-use applications noted in the references are somewhat different than those in previous years. To remain consistent throughout the timespan, the data for year 2014 are used instead for years 2015 and 2016. | (201-209)      |
|           | Cryogenics                     | Liquid helium-cooled superconducting magnets in magnetic resonance imaging (MRI) machines. Note that a sizeable portion of the helium for this application is likely purchased in this application is by the MRI user (e.g., hospitals and clinics) rather than the manufacturers. Helium cooling of superconducting magnets is also used in the manufacture of single-crystal boules, as well as small- and large-scale laboratory research (e.g., Large Hadron Collider) (579)       | 334419 (2007-2016);<br>334510 (2007-2016);<br>334516 (2007-2016)                                                          |                                                                                                                                                                                                                                                                                                                                           |                |
|           | Leak detection                 | Helium's use in detecting leaks in science and technology applications (579)                                                                                                                                                                                                                                                                                                                                                                                                           | 334519 (2007-2016)                                                                                                        |                                                                                                                                                                                                                                                                                                                                           |                |
|           | Purging and pressuring         | Liquid helium/liquid oxygen fueled rocket propulsion systems. Note that a sizeable portion of the helium is purchased in this application is by the users of the rocket propulsion systems (e.g., NASA and U.S. Department of Defense) rather than the manufacturers (579)                                                                                                                                                                                                             | 336415 (2007-2014, 2016);<br>33641 (2015)                                                                                 |                                                                                                                                                                                                                                                                                                                                           |                |
|           | Welding                        | In metal welding, helium is used as a shielding gas to prevent atmospheric contamination (e.g., gas tungsten arc welding) (579)                                                                                                                                                                                                                                                                                                                                                        | 332312 (2007, 2012-2016);<br>332313 (2007, 2012-2016);<br>33231 (2008-2011);<br>332410 (2007-2016);<br>332420 (2007-2016) |                                                                                                                                                                                                                                                                                                                                           |                |
|           | Other                          | Various other applications including helium's use as a lifting gas (e.g., party and large holiday balloons, weather and research balloons), chromatographic separation in the pharmaceutical and other industries, and breathing mixtures (e.g., Heliox, Trimix, and Heliair) for recreational (e.g., diving) and nonrecreational use (e.g., medical and scientific), to name a few. In many cases the end-users rather than the manufacturers are the purchasers of the helium. (579) | 325120 (2007-2016);<br>325412 (2007-2016);<br>339920 (2007-2016)                                                          |                                                                                                                                                                                                                                                                                                                                           |                |
| Indium    | Indium-tin-oxide               | Transparent, electrically conductive thin-film coating for flat-panel displays, especially liquid crystal displays (LCDs) (211)                                                                                                                                                                                                                                                                                                                                                        | 334419 (2007-2016)                                                                                                        | No representative distribution among applications was available for the United States; all categories were combined in the analysis                                                                                                                                                                                                       | Not applicable |
|           | Alloys                         | Indium-lead solders for inhibiting gold leaching in electronics; indium-silver alloys as a thermal interface in electronics; indium-tin alloys as bonding agents for nonmetallic materials; indium alloys for dental applications (211)                                                                                                                                                                                                                                                | 331491 (2007, 2012-2106);<br>33149 (2008-2011);<br>339114 (2007-2016);<br>339116 (2007-2016)                              |                                                                                                                                                                                                                                                                                                                                           |                |
|           | Semiconductor and photovoltaic | Indium-phosphide in optoelectronic devices for fiber-optic communication; indium-gallium-selenide (CIGS) thin-film photovoltaic solar cells; indium-gallium-zinc oxide in organic light-emitting diode (OLED) displays and LCDs (211)                                                                                                                                                                                                                                                  | 334413 (2007-2016)                                                                                                        |                                                                                                                                                                                                                                                                                                                                           |                |
| Iridium   | Chemical                       | Process catalysts used in the manufacture of acetic acid (Cativa® process), hydrogenation (Crabtree's catalyst), and hydroformylation; as well as the herbicide Metolachlor. Co-catalyst with platinum used in                                                                                                                                                                                                                                                                         | 325199 (2007, 2012-2016);<br>32519 (2008-2011);<br>325320 (2007-2016);                                                    | Demand fractions are based on global data due to lack of                                                                                                                                                                                                                                                                                  | (580-582)      |

| Commodity | Application category     | Application description                                                                                                                                                                                                                                                                                                                                                                                                                                                                                                                                                                                                                                                    | Associated NAICS codes (applicable years)                                                                                                                                                                                                                                                                  | U.S. demand fraction                                                              |            |
|-----------|--------------------------|----------------------------------------------------------------------------------------------------------------------------------------------------------------------------------------------------------------------------------------------------------------------------------------------------------------------------------------------------------------------------------------------------------------------------------------------------------------------------------------------------------------------------------------------------------------------------------------------------------------------------------------------------------------------------|------------------------------------------------------------------------------------------------------------------------------------------------------------------------------------------------------------------------------------------------------------------------------------------------------------|-----------------------------------------------------------------------------------|------------|
|           |                          |                                                                                                                                                                                                                                                                                                                                                                                                                                                                                                                                                                                                                                                                            |                                                                                                                                                                                                                                                                                                            | Notes                                                                             | References |
|           |                          | petroleum reforming                                                                                                                                                                                                                                                                                                                                                                                                                                                                                                                                                                                                                                                        | <b>324110</b> (2007-2016)                                                                                                                                                                                                                                                                                  | data for the United States                                                        |            |
|           | Electrical & electronics | Crucibles used to grow single crystals (Czochralski process) including lithium tantalite for surface acoustic wave (SAW) noise filters for wireless telecommunications, sapphire for light-emitting diodes (LEDs), yttrium aluminum garnet for solid state lasers, gadolinium gallium garnet for bubble electronic memories, and lutetium oxyorthosilicate and gadolinium oxyorthosilicate as scintillator crystals for medical imaging including positron emission topography (PET) scanners; thermocouples for process control mainly used in the semiconductors and steel industries; and as a phosphorescent emitter material in organic light-emitting diodes (OLEDs) | <b>334419</b> (2007-2016);<br><b>334513</b> (2007-2016);<br><b>334413</b> (2007-2016)                                                                                                                                                                                                                      |                                                                                   |            |
|           | Electrochemical          | Coating for dimensionally stable anodes used in the membrane technology of the chlor-alkali industry (chlorine and sodium hydroxide manufacture) and sodium chlorate production                                                                                                                                                                                                                                                                                                                                                                                                                                                                                            | <b>325181</b> (2007-2011);<br><b>325180</b> (2012-2016)                                                                                                                                                                                                                                                    |                                                                                   |            |
|           | Other                    | Alloying agent with platinum used in electrodes for automotive spark plug tips and aircraft engine igniters; alloying agent with platinum in medical devices such as pacemakers and catheters; alloying agent in platinum jewelry. Other uses, such as iridium's use for cathodic protection and iridium's former use in catalytic converter, are assumed to be relatively minor.                                                                                                                                                                                                                                                                                          | <b>336322</b> (2007);<br><b>33632</b> (2008-2011);<br><b>336320</b> (2012-2016);<br><b>336412</b> (2007-2016);<br><b>334510</b> (2007-2016);<br><b>339911</b> (2007);<br><b>339912</b> (2007);<br><b>339913</b> (2007);<br><b>339914</b> (2007);<br><b>33991</b> (2008-2011);<br><b>339910</b> (2012-2016) |                                                                                   |            |
| Iron ore  | Iron and steel           | Iron ore consumption in iron and steel plants (blast and steelmaking furnaces)                                                                                                                                                                                                                                                                                                                                                                                                                                                                                                                                                                                             | <b>331111</b> (2007);<br><b>33111</b> (2008-2011);<br><b>331110</b> (2012-2016)                                                                                                                                                                                                                            | Demand fractions are assumed constant at 98% for iron and steel and 2% other uses | (119)      |
|           | Other                    | Non-steel uses include "ballast, cement clinker production, coal washing, crushed road base material, fertilizer, heavy media separation, iron oxide pigments, ferrite magnets, oil and gas well drilling, radiation shielding, water treatment, and other specialty applications" (232)                                                                                                                                                                                                                                                                                                                                                                                   | <b>325510</b> (2007-2016);<br><b>324121</b> (2007-2016);<br><b>324199</b> (2007-2016);<br><b>327310</b> (2007-2016);<br><b>327113</b> (2007-2016);<br><b>327110</b> (2012-2016);<br><b>325998</b> (2007, 2012-2016);<br><b>32599</b> (2008-2011)                                                           |                                                                                   |            |
| Lanthanum | Batteries                | Additive to nickel-metal-hydride (NiMH) battery alloys, which are used to power portable electronics, hybrid electric vehicles, and power tools, among others                                                                                                                                                                                                                                                                                                                                                                                                                                                                                                              | <b>335911</b> (2007-2016);                                                                                                                                                                                                                                                                                 | See section on rare earth demand and net imports in this document for details     | (565)      |
|           | Catalyst                 | Catalysts predominantly used in petroleum catalytic cracking, and, to a lesser degree, automotive catalytic converters                                                                                                                                                                                                                                                                                                                                                                                                                                                                                                                                                     | <b>324110</b> (2007-2016);<br><b>336399</b> (2007-2011);<br><b>336390</b> (2012-2016);                                                                                                                                                                                                                     |                                                                                   |            |

| Commodity     | Application category   | Application description                                                                                                                                                                                                                                                                              | Associated NAICS codes<br>(applicable years)                                                                                                                       | U.S. demand fraction                                                                                                                                                                                 |                          |
|---------------|------------------------|------------------------------------------------------------------------------------------------------------------------------------------------------------------------------------------------------------------------------------------------------------------------------------------------------|--------------------------------------------------------------------------------------------------------------------------------------------------------------------|------------------------------------------------------------------------------------------------------------------------------------------------------------------------------------------------------|--------------------------|
|               |                        |                                                                                                                                                                                                                                                                                                      |                                                                                                                                                                    | Notes                                                                                                                                                                                                | References               |
|               |                        |                                                                                                                                                                                                                                                                                                      | <b>325110</b> (2007-2016)                                                                                                                                          |                                                                                                                                                                                                      |                          |
|               | Ceramics               | Stabilizing oxide in zirconia ceramics used in a variety of applications in ceramic capacitors and solid oxide fuel cells                                                                                                                                                                            | <b>334414</b> (2007-2011);<br><b>334416</b> (2012-2016);                                                                                                           |                                                                                                                                                                                                      |                          |
|               | Glass                  | Mainly used as an additive to improve optical glass properties of small optical lenses mainly for consumer electronics                                                                                                                                                                               | <b>327212</b> (2007-2016);<br><b>335921</b> (2007, 2012-2016);<br><b>33592</b> (2008-2011);<br><b>333314</b> (2007-2016)                                           |                                                                                                                                                                                                      |                          |
|               | Metallurgy             | Mischmetal and rare-earth silicide used as an additive to steel and iron, as well as other metallurgical applications including aluminum and magnesium alloys (565)                                                                                                                                  | <b>331111</b> (2007);<br><b>331112</b> (2007);<br><b>33111</b> (2008-11);<br><b>331110</b> (2012-2016);<br><b>336999</b> (2007-2016);<br><b>339999</b> (2007-2016) |                                                                                                                                                                                                      |                          |
|               | Phosphors and pigments | Lamp phosphors including fluorescent and LED lamps, as well as display phosphors                                                                                                                                                                                                                     | <b>325131</b> (2007);<br><b>32513</b> (2008-2011);<br><b>325130</b> (2012-2016);<br><b>335110</b> (2007-2016);<br><b>334517</b> (2007-2016)                        |                                                                                                                                                                                                      |                          |
|               | Polishing              | Polishing powders to create finished surface of glass and electrical components including flat glass, optical glass, liquid crystal displays, silicon wafer surfaces for integrated circuits, glass hard discs, among others (566)                                                                   | <b>334220</b> (2007-2016);<br><b>334413</b> (2007-2016);<br><b>339115</b> (2007-2016)                                                                              |                                                                                                                                                                                                      |                          |
|               | Other                  | Various uses included food supplement and fertilizer additive, additive to paints and coatings, stabilizer for polyvinyl chloride (PVC), cement additive, electron microprobes, and magnetic refrigeration (566)                                                                                     | <b>325211</b> (2007-2016);<br><b>325411</b> (2007-2016);<br><b>325510</b> (2007-2016);<br><b>334511</b> (2007-2016)                                                |                                                                                                                                                                                                      |                          |
| Lead mine     | Lead primary refining  | Primary feed into lead refineries. Note that primary lead refining was suspended starting year 2014.                                                                                                                                                                                                 | <b>331</b> (2007);<br><b>33141</b> (2008-2011);<br><b>331410</b> (2012-2013)                                                                                       | All lead concentrate is assumed to be consumed by lead refineries                                                                                                                                    | Not applicable           |
| Lead refinery | Ammunition             | Shots and bullets                                                                                                                                                                                                                                                                                    | <b>332992</b> (2007-2016)                                                                                                                                          | Demand fractions are based on U.S. consumption of lead by product. In certain cases, data are withheld by references to avoid disclosing company proprietary data but are included in this analysis. | (251–256, 531, 583, 584) |
|               | Batteries              | Storage lead-acid batteries mainly for starting, lighting, and ignition (SLI) of vehicles. Other uses include non-SLI battery use in nonroad vehicles (e.g., industrial forklifts, airport group equipment, mining equipment, nonroad utility vehicles) as well as stationary sources of power (585) | <b>335911</b> (2007-2016);<br><b>335912</b> (2007-2016)                                                                                                            |                                                                                                                                                                                                      |                          |
|               | Brass and bronze       | Alloying element                                                                                                                                                                                                                                                                                     | <b>331421</b> (2007);<br><b>33142</b> (2008-2011);<br><b>331420</b> (2012-2016)                                                                                    |                                                                                                                                                                                                      |                          |
|               | Cable covering         | Power and communication cable covering                                                                                                                                                                                                                                                               | <b>335929</b> (2007, 2012-2016);<br><b>33592</b> (2008-2011)                                                                                                       |                                                                                                                                                                                                      |                          |
|               | Electronics            | Mainly as solders in electronic components                                                                                                                                                                                                                                                           | <b>334</b> (2007-2016)                                                                                                                                             |                                                                                                                                                                                                      |                          |
|               | Glass and ceramics     | Leaded glass and lead glazes in ceramics and pottery                                                                                                                                                                                                                                                 | <b>327</b> (2007, 2016);<br><b>3271</b> (2008-2011, 2013-2016);                                                                                                    |                                                                                                                                                                                                      |                          |

| Commodity | Application category               | Application description                                                                                                                                                                                                   | Associated NAICS codes<br>(applicable years)                                                                                                                                                                       | U.S. demand fraction                                                                                                                         |            |
|-----------|------------------------------------|---------------------------------------------------------------------------------------------------------------------------------------------------------------------------------------------------------------------------|--------------------------------------------------------------------------------------------------------------------------------------------------------------------------------------------------------------------|----------------------------------------------------------------------------------------------------------------------------------------------|------------|
|           |                                    |                                                                                                                                                                                                                           |                                                                                                                                                                                                                    | Notes                                                                                                                                        | References |
|           |                                    |                                                                                                                                                                                                                           | 3272 (2008-2011, 2013-2016);                                                                                                                                                                                       |                                                                                                                                              |            |
|           | Metal cans                         | Solder used in metal cans and shipping containers                                                                                                                                                                         | 332431 (2007, 2012-2016);<br>332439 (2007, 2012-2016);<br>33243 (2008-2011)                                                                                                                                        |                                                                                                                                              |            |
|           | Paints, pigments,<br>and chemicals | Use in paints, pigments, and other chemicals                                                                                                                                                                              | 325131 (2007);<br>32513 (2008-2011);<br>325130 (2012-2016);<br>325510 (2007-2016);<br>325998 (2007, 2012-2016);<br>32599 (2008-2011)                                                                               |                                                                                                                                              |            |
|           | Petroleum refining                 | Gasoline additive                                                                                                                                                                                                         | 324110 (2007-2016)                                                                                                                                                                                                 |                                                                                                                                              |            |
|           | Printing                           | Type metal for printing                                                                                                                                                                                                   | 333293 (2007);<br>33329 (2008-2011);<br>333244 (2012-2016)                                                                                                                                                         |                                                                                                                                              |            |
|           | Storage tanks                      | Storage tanks, process vessels, and nuclear radiation shielding                                                                                                                                                           | 332410 (2007-2016)<br>332420 (2007-2016)                                                                                                                                                                           |                                                                                                                                              |            |
|           | Transportation                     | Bearing, casting, and terne metal used in motor vehicles and other transportation parts and equipment                                                                                                                     | 336 (2007-2016)                                                                                                                                                                                                    |                                                                                                                                              |            |
|           | Other                              | Various uses included bearing and casting metal for electrical and mechanical machinery, caulking, pipes, and sheet lead for building construction, and other miscellaneous uses                                          | 325520 (2007-2016);<br>331491 (2007, 2012-2016);<br>33149 (2008-2011);<br>331522 (2007);<br>33152 (2008-2011);<br>331523 (2012-2016);<br>332999 (2007, 2011-2016);<br>33299 (2008-2011)                            |                                                                                                                                              |            |
| Lithium   | Air treatment                      | Lithium chemicals (lithium bromide, lithium chloride and lithium hydroxides and oxides) used in absorption chillers, dehumidification and carbon dioxide removal (274)                                                    | 333413 (2007-2016);<br>333415 (2007-2016);<br>335211 (2007);<br>33521 (2008-2011);<br>335210 (2012-2016)                                                                                                           | Demand fractions for the United States are not available. They are estimated in this analysis based on information provided in the reference | (274)      |
|           | Batteries                          | Lithium-ion rechargeable batteries, primary (non-rechargeable) lithium batteries, as well as nickel-metal-hydride rechargeable batteries that use small amounts of lithium (274)                                          | 335911 (2007-2016);<br>335912(2007-2016)                                                                                                                                                                           |                                                                                                                                              |            |
|           | Ceramics and glass                 | Lithium carbonate and lithium minerals in ceramics (tiles, sanitaryware, tableware, cookware), as well as glaze and enamels; glass-ceramics; and glass, including container glass, fiber glass, and specialty glass (274) | 327111 (2007);<br>327112 (2007);<br>327113 (2007);<br>32711 (2008-2011);<br>327110 (2012-2016);<br>327122 (2007-2011);<br>327120 (2012-2016);<br>327211 (2007-2016);<br>327212 (2007-2016);<br>327213 (2007-2016); |                                                                                                                                              |            |

| Commodity         | Application category  | Application description                                                                                                                                                                                                                                                                                                                                                                                                                                                                                                                                                                      | Associated NAICS codes<br>(applicable years)                                                                                                                                                                                                                                                                     | U.S. demand fraction                                                                                                                                                                                       |                    |
|-------------------|-----------------------|----------------------------------------------------------------------------------------------------------------------------------------------------------------------------------------------------------------------------------------------------------------------------------------------------------------------------------------------------------------------------------------------------------------------------------------------------------------------------------------------------------------------------------------------------------------------------------------------|------------------------------------------------------------------------------------------------------------------------------------------------------------------------------------------------------------------------------------------------------------------------------------------------------------------|------------------------------------------------------------------------------------------------------------------------------------------------------------------------------------------------------------|--------------------|
|                   |                       |                                                                                                                                                                                                                                                                                                                                                                                                                                                                                                                                                                                              |                                                                                                                                                                                                                                                                                                                  | Notes                                                                                                                                                                                                      | References         |
|                   |                       |                                                                                                                                                                                                                                                                                                                                                                                                                                                                                                                                                                                              | 327215 (2007-2016)                                                                                                                                                                                                                                                                                               |                                                                                                                                                                                                            |                    |
|                   | Lubricating greases   | Simple and complex lithium lubricating greases used in a variety of applications including industrial, transportation, commercial and household uses (274)                                                                                                                                                                                                                                                                                                                                                                                                                                   | 324191 (2007-2016)                                                                                                                                                                                                                                                                                               |                                                                                                                                                                                                            |                    |
|                   | Metallurgical powders | Lithium metallurgical powders used in continuous casting of steel                                                                                                                                                                                                                                                                                                                                                                                                                                                                                                                            | 331513 (2007, 2012-2016);<br>33151 (2011-2015)                                                                                                                                                                                                                                                                   |                                                                                                                                                                                                            |                    |
|                   | Polymer production    | Butyllithium used as an initiator for the polymerization of synthetic rubbers (e.g., styrene-butadiene rubber and polybutadiene rubber), as well as catalysts for thermoplastics (e.g., styrene block copolymer)                                                                                                                                                                                                                                                                                                                                                                             | 325211 (2007-2016);<br>325212 (2007-2016)                                                                                                                                                                                                                                                                        |                                                                                                                                                                                                            |                    |
|                   | Other                 | Various uses including alloys, mainly lithium-aluminum alloys used in commercial and military aircraft and space vehicles; lithium chemicals for organic synthesis in pharmaceuticals, agrochemicals, and flavors and fragrances; lithium carbonate additive to the electrolyte in aluminum smelting; lithium hypochlorite for sanitization; lithium salts in alumina cements and concrete used in construction; alkyd resins used in paints and coatings; lithium niobate and lithium tantalite used in surface acoustic wave filters for telecommunications and consumer electronics (274) | 325188 (2007-2011);<br>325180 (2012-2016);<br>325199 (2007, 2012-2016);<br>32519 (2008-2011);<br>325320 (2007-2016);<br>325412 (2007-2016);<br>325998 (2007, 2012-2016);<br>32599 (2008-2011);<br>327310 (2007-2016);<br>331312 (2007-2011);<br>331313 (2012-2016);<br>331314 (2007-2016);<br>334419 (2007-2016) |                                                                                                                                                                                                            |                    |
| Magnesium (metal) | Casting               | Cast structural products                                                                                                                                                                                                                                                                                                                                                                                                                                                                                                                                                                     | 331521 (2007);<br>331522 (2007);<br>331523 (2012-2016);<br>331524 (2007, 2012-2016);<br>331528 (2007);<br>331529 (2012-2016);<br>33152 (2008-2011)                                                                                                                                                               | Demand fractions are based on U.S. consumption of primary magnesium by use as reported the references, with adjustments for the uses of secondary magnesium as reported as reported by the same references | (275–280, 532–534) |
|                   | Wrought products      | Wrought structural products including sheet, plate, and forgings                                                                                                                                                                                                                                                                                                                                                                                                                                                                                                                             | 331491 (2007, 2012-2016);<br>331492 (2007, 2012-2016);<br>33149 (2008-2011);<br>332999 (2007, 2012-2016);<br>33299 (2008-2011)                                                                                                                                                                                   |                                                                                                                                                                                                            |                    |
|                   | Aluminum alloys       | Magnesium-aluminum alloys used in packaging, transportation and other applications                                                                                                                                                                                                                                                                                                                                                                                                                                                                                                           | 331312 (2007-2011);<br>331313 (2012-2016);<br>331314 (2007-2016);<br>331315 (2007-2016);<br>331316 (2007-2011);<br>331319 (2007)<br>33131N (2008-2011);<br>331318 (2012-2016)                                                                                                                                    |                                                                                                                                                                                                            |                    |
|                   | Cathodic protection   | Sacrificial magnesium anodes used for cathodic protection                                                                                                                                                                                                                                                                                                                                                                                                                                                                                                                                    | 332813 (2007, 2012-2016);<br>33281 (2008-2011)                                                                                                                                                                                                                                                                   |                                                                                                                                                                                                            |                    |

| Commodity | Application category           | Application description                                                                                                                                                                                                                                                                                                                                  | Associated NAICS codes<br>(applicable years)                                                                                                                                                                                                                                                                                                                                         | U.S. demand fraction                                                                                                                                                   |                     |
|-----------|--------------------------------|----------------------------------------------------------------------------------------------------------------------------------------------------------------------------------------------------------------------------------------------------------------------------------------------------------------------------------------------------------|--------------------------------------------------------------------------------------------------------------------------------------------------------------------------------------------------------------------------------------------------------------------------------------------------------------------------------------------------------------------------------------|------------------------------------------------------------------------------------------------------------------------------------------------------------------------|---------------------|
|           |                                |                                                                                                                                                                                                                                                                                                                                                          |                                                                                                                                                                                                                                                                                                                                                                                      | Notes                                                                                                                                                                  | References          |
|           | Iron and steel desulfurization | Magnesium used in the desulfurization of iron and steel                                                                                                                                                                                                                                                                                                  | <b>331111</b> (2007);<br><b>331111</b> (2008-2011);<br><b>331110</b> (2012-2016)                                                                                                                                                                                                                                                                                                     |                                                                                                                                                                        |                     |
|           | Nodular iron                   | Magnesium additive to nodular iron                                                                                                                                                                                                                                                                                                                       | <b>331511</b> (2007, 2012-2016);<br><b>33151</b> (2008-2011)                                                                                                                                                                                                                                                                                                                         |                                                                                                                                                                        |                     |
|           | Reducing agent                 | Reducing agent for the production of titanium, zirconium, hafnium, uranium, and beryllium                                                                                                                                                                                                                                                                | <b>331</b> (2007);<br><b>33141</b> (2008-2011);<br><b>331410</b> (2012-2016)                                                                                                                                                                                                                                                                                                         |                                                                                                                                                                        |                     |
|           | Other                          | Various uses including magnesium chemicals and scavenger, deoxidizer, and powder                                                                                                                                                                                                                                                                         | <b>325188</b><br><b>325180</b> (2012-2016)                                                                                                                                                                                                                                                                                                                                           |                                                                                                                                                                        |                     |
|           |                                |                                                                                                                                                                                                                                                                                                                                                          |                                                                                                                                                                                                                                                                                                                                                                                      |                                                                                                                                                                        |                     |
| Manganese | Steel                          | In steelmaking, manganese is added for desulphurization. It is also added as an alloying element to improve toughness, formability, hardness, and strength. All steels require manganese. This category also includes cast iron.                                                                                                                         | <b>331111</b> (2007);<br><b>331112</b> (2007);<br><b>331111</b> (2008-2011);<br><b>331110</b> (2012-2016);<br><b>331210</b> (2007-2016);<br><b>331221</b> (2007, 2012-2016);<br><b>331222</b> (2007, 2012-2016);<br><b>33122</b> (2008-2011)<br><b>331511</b> (2007, 2012-2016);<br><b>331512</b> (2007, 2012-2016);<br><b>331513</b> (2007, 2012-2016);<br><b>33151</b> (2008-2011) | Demand fractions are estimated based on information reported on U.S. consumption of manganese metal and manganese ferroalloys reported in the references.              | (281, 586)          |
|           | Non-ferrous alloys             | Additive to non-ferrous alloys, mainly aluminum alloys                                                                                                                                                                                                                                                                                                   | <b>331314</b> (2007-2016);<br><b>331423</b> (2007);<br><b>33142</b> (2008-2011);<br><b>331420</b> (2012-2016);<br><b>331491</b> (2007, 2012-2016);<br><b>331492</b> (2007, 2012-2016);<br><b>33149</b> (2008-2011)                                                                                                                                                                   |                                                                                                                                                                        |                     |
|           | Other                          | Various uses including pigments, primary and storage batteries, and catalysts and other chemical uses.                                                                                                                                                                                                                                                   | <b>325131</b> (2007);<br><b>32513</b> (2008-2011);<br><b>325130</b> (2012-2016);<br><b>325188</b> (2007-2011)<br><b>325180</b> (2012-2016);<br><b>335911</b> (2007-2016);<br><b>335912</b> (2007-2016)                                                                                                                                                                               |                                                                                                                                                                        |                     |
| Mica      | Joint compounds                | Ground mica used in joint compounds for “filling and finishing seems and blemishes in gypsum wallboard” (364)                                                                                                                                                                                                                                            | <b>327420</b> (2007-2016)                                                                                                                                                                                                                                                                                                                                                            | Demand fractions are based on ground mica sold or used by producers in the United States by end-use (364–369, 380, 381). Built-up mica, mica paper, and sheet mica are | (364–369, 380, 381) |
|           | Paints                         | Ground mica use as a “pigment extender that also facilitates suspension, reduces chalking, prevents shrinking and shearing of the paint film, increases resistance of the paint film to water penetration and weathering, and brightens the tone of colored pigments. Mica also promotes paint adhesion in aqueous and oleoresinous formulations.” (364) | <b>325131</b> (2007);<br><b>325132</b> (2007);<br><b>32513</b> (2008-2011);<br><b>325130</b> (2012-2016);<br><b>325510</b> (2007-2016)                                                                                                                                                                                                                                               |                                                                                                                                                                        |                     |
|           | Plastics                       | Ground mica used an extender and filler in plastics, especially for automotive parts (364)                                                                                                                                                                                                                                                               | <b>325211</b> (2007-2016);<br><b>326121</b> (2007-2016);                                                                                                                                                                                                                                                                                                                             |                                                                                                                                                                        |                     |



| Commodity  | Application category     | Application description                                                                                                                                                                                                                                                             | Associated NAICS codes<br>(applicable years)                                                                                                                                                                                                                                                                                                                                                                     | U.S. demand fraction                                                                                                                                                                                                                                                |                    |
|------------|--------------------------|-------------------------------------------------------------------------------------------------------------------------------------------------------------------------------------------------------------------------------------------------------------------------------------|------------------------------------------------------------------------------------------------------------------------------------------------------------------------------------------------------------------------------------------------------------------------------------------------------------------------------------------------------------------------------------------------------------------|---------------------------------------------------------------------------------------------------------------------------------------------------------------------------------------------------------------------------------------------------------------------|--------------------|
|            |                          |                                                                                                                                                                                                                                                                                     |                                                                                                                                                                                                                                                                                                                                                                                                                  | Notes                                                                                                                                                                                                                                                               | References         |
|            |                          |                                                                                                                                                                                                                                                                                     | <b>326122</b> (2007-2016);<br><b>326130</b> (2007-2016);<br><b>326199</b> (2007, 2012-2016);<br><b>32619</b> (2008-2011)                                                                                                                                                                                                                                                                                         | excluded.                                                                                                                                                                                                                                                           |                    |
|            | Well-drilling muds       | Ground mica used in well-drilling muds                                                                                                                                                                                                                                              | <b>325998</b> (2007);<br><b>32599</b> (2008-2010)                                                                                                                                                                                                                                                                                                                                                                |                                                                                                                                                                                                                                                                     |                    |
|            | Other                    | Various uses of ground mica including “molded electrical insulation, roofing, rubber, textile and decorative coatings, welding rods” and miscellaneous” (364). This category also includes well-drilling mud for years 2011-2016 due to lack of disaggregated data for those years. | <b>324112</b> (2007-2016);<br><b>325212</b> (2007-2016);<br><b>325520</b> (2007-2016);<br><b>326211</b> (2007, 2012-2016);<br><b>32621</b> (2008-2011);<br><b>326220</b> (2007-2016);<br><b>326291</b> (2007, 2012-2016);<br><b>326299</b> (2007, 2012-2016);<br><b>32629</b> (2008-2011);<br><b>333992</b> (2007, 2012-2016);<br><b>33399</b> (2008-2011);<br><b>32599</b> (2011);<br><b>325998</b> (2012-2016) |                                                                                                                                                                                                                                                                     |                    |
| Molybdenum | Cast iron                | Alloying agent in cast iron                                                                                                                                                                                                                                                         | <b>331511</b> (2007, 2012-2016);<br><b>33151</b> (2008-2011)                                                                                                                                                                                                                                                                                                                                                     | Demand fractions are estimated based on U.S consumption of molybdc oxides, ferromolybdenum ammonium and sodium molybdate, molybdenum scrap, and other forms of molybdenum materials (all converted to molybdenum content) by end-use as reported by the references. | (382–387, 587–589) |
|            | Catalysts and other uses | Mainly used as catalysts in the petroleum and petrochemical industries                                                                                                                                                                                                              | <b>325188</b> (2007-2011);<br><b>325180</b> (2012-2016);<br><b>324110</b> (2007-2016);<br><b>325110</b> (2007-2016)                                                                                                                                                                                                                                                                                              |                                                                                                                                                                                                                                                                     |                    |
|            | Lubricants               | Molybdenum disulfide used in lubrication                                                                                                                                                                                                                                            | <b>324191</b> (2007-2016)                                                                                                                                                                                                                                                                                                                                                                                        |                                                                                                                                                                                                                                                                     |                    |
|            | Mill products            | Various mill products made from metallurgical powder                                                                                                                                                                                                                                | <b>332117</b> (2007-2016)                                                                                                                                                                                                                                                                                                                                                                                        |                                                                                                                                                                                                                                                                     |                    |
|            | Nonferrous alloys        | Additive to nonferrous alloys and molybdenum metal                                                                                                                                                                                                                                  | <b>331491</b> (2007, 2012-2016);<br><b>331492</b> (2007, 2012-2016);<br><b>33149</b> (2008-2011)                                                                                                                                                                                                                                                                                                                 |                                                                                                                                                                                                                                                                     |                    |
|            | Pigments                 | Molybdenum-based pigments to provide stable color formation and inhibit corrosion                                                                                                                                                                                                   | <b>325131</b> (2007);<br>32513 (2008-2011);<br>325130 (2012-2016)                                                                                                                                                                                                                                                                                                                                                |                                                                                                                                                                                                                                                                     |                    |
|            | Steels                   | Alloying agent to various steels, including engineering steels, stainless steels, tools steels, and superalloys, to improve strength, wear- and corrosion-resistance, and hardness                                                                                                  | <b>331111</b> (2007);<br><b>331112</b> (2007);<br><b>33111</b> (2008-2011);<br><b>331110</b> (2012-2016);<br><b>331221</b> (2007, 2012-2016);<br><b>331222</b> (2007, 2012-2016);<br><b>33122</b> (2008-2011)                                                                                                                                                                                                    |                                                                                                                                                                                                                                                                     |                    |
| Neodymium  | Batteries                | Additive to nickel-metal-hydride (NiMH) battery alloys, which are used to power portable electronics, hybrid electric vehicles, and power tools, among others                                                                                                                       | <b>335911</b> (2015, 2016);                                                                                                                                                                                                                                                                                                                                                                                      | See section on rare earth demand and net imports in this document for details                                                                                                                                                                                       | (565)              |
|            | Catalysts                | Catalysts used in automotive catalytic converters and synthetic rubber                                                                                                                                                                                                              | <b>336390</b> (2015, 2016);                                                                                                                                                                                                                                                                                                                                                                                      |                                                                                                                                                                                                                                                                     |                    |

| Commodity    | Application category                   | Application description                                                                                                                                                                                                                                                                      | Associated NAICS codes<br>(applicable years)                                                                                                                                                                                                                                                                                                                                                                                                                                | U.S. demand fraction                                                                              |                    |
|--------------|----------------------------------------|----------------------------------------------------------------------------------------------------------------------------------------------------------------------------------------------------------------------------------------------------------------------------------------------|-----------------------------------------------------------------------------------------------------------------------------------------------------------------------------------------------------------------------------------------------------------------------------------------------------------------------------------------------------------------------------------------------------------------------------------------------------------------------------|---------------------------------------------------------------------------------------------------|--------------------|
|              |                                        |                                                                                                                                                                                                                                                                                              |                                                                                                                                                                                                                                                                                                                                                                                                                                                                             | Notes                                                                                             | References         |
|              |                                        | synthesis, as well as an additive to petroleum catalytic cracking                                                                                                                                                                                                                            | <b>325212</b> (2015, 2016);<br><b>324110</b> (2015, 2016)                                                                                                                                                                                                                                                                                                                                                                                                                   |                                                                                                   |                    |
|              | Ceramics                               | Neodymium oxide mainly used in ceramic capacitors                                                                                                                                                                                                                                            | <b>334416</b> (2015, 2016)                                                                                                                                                                                                                                                                                                                                                                                                                                                  |                                                                                                   |                    |
|              | Glass                                  | Neodymium used in tinting glass bottles, neodymium-doped glass used in optic fiber and neodymium fluoride to coat glass for scientific lenses, laser mirrors, etc.                                                                                                                           | <b>327212</b> (2015, 2016);<br><b>335921</b> (2015, 2016)                                                                                                                                                                                                                                                                                                                                                                                                                   |                                                                                                   |                    |
|              | Magnets                                | Neodymium-iron-boron permanent magnets used in various automotive applications (including drivetrain in electric and hybrid electric vehicles, electric power steering, etc.), consumer electronics (e.g., hard disk drives), off-shore wind turbines, air-conditioners, and many other uses | <b>335312</b> (2015, 2016);<br><b>334112</b> (2015, 2016);<br><b>333611</b> (2015, 2016);<br><b>336330</b> (2015, 2016);<br><b>334210</b> (2015, 2016);<br><b>336350</b> (2015, 2016);<br><b>333415</b> (2015, 2016);<br><b>336991</b> (2015, 2016);<br><b>333249</b> (2015, 2016);<br><b>334510</b> (2015, 2016);<br><b>333912</b> (2015, 2016);<br><b>333993</b> (2015, 2016);<br><b>335314</b> (2015, 2016);<br><b>33522</b> (2015, 2016);<br><b>336510</b> (2015, 2016) |                                                                                                   |                    |
|              | Metallurgy                             | Mischmetal used as an additive to steel and iron, as well as other metallurgical applications, especially magnesium alloys (565)                                                                                                                                                             | <b>331110</b> (2015, 2016);<br><b>336999</b> (2015, 2016);<br><b>339999</b> (2015, 2016)                                                                                                                                                                                                                                                                                                                                                                                    |                                                                                                   |                    |
|              | Pigments                               | Neodymium pigment to produce blue to purple color                                                                                                                                                                                                                                            | <b>325130</b> (2015, 2016)                                                                                                                                                                                                                                                                                                                                                                                                                                                  |                                                                                                   |                    |
|              | Polishing                              | Minor quantities used in cerium-oxide-based polishing powders                                                                                                                                                                                                                                | <b>334220</b> (2015, 2016);<br><b>339115</b> (2015, 2016);<br><b>334413</b> (2015, 2016)                                                                                                                                                                                                                                                                                                                                                                                    |                                                                                                   |                    |
|              | Other                                  | Minor quantities used in fiber optic manufacturing                                                                                                                                                                                                                                           | <b>334511</b> (2015, 2016)                                                                                                                                                                                                                                                                                                                                                                                                                                                  |                                                                                                   |                    |
| Nickel mine  | Smelting and refining                  | Primary feed into base metal smelters and refineries                                                                                                                                                                                                                                         | <b>311</b> (2007);<br><b>31141</b> (2008-2011);<br><b>311410</b> (2012-2016)                                                                                                                                                                                                                                                                                                                                                                                                |                                                                                                   |                    |
| Nickel plant | Cast iron                              |                                                                                                                                                                                                                                                                                              | <b>331511</b> (2007, 2012-2016);<br><b>33151</b> (2008-2011)                                                                                                                                                                                                                                                                                                                                                                                                                | Demand fraction are based on U.S. nickel consumption by application as reported by the references | (389–394, 590–592) |
|              | Chemicals and chemical uses            |                                                                                                                                                                                                                                                                                              | <b>324110</b> (2007-2016);<br><b>325188</b> (2007-2011);<br><b>325180</b> (2012-2016);                                                                                                                                                                                                                                                                                                                                                                                      |                                                                                                   |                    |
|              | Electric, magnet, and expansion alloys |                                                                                                                                                                                                                                                                                              | <b>332999</b> (2007, 2012-2016);<br><b>33299</b> (2008-2011)                                                                                                                                                                                                                                                                                                                                                                                                                |                                                                                                   |                    |
|              | Electroplating                         |                                                                                                                                                                                                                                                                                              | <b>332813</b> (2007, 2012-2016);<br><b>33281</b> (2008-2011)                                                                                                                                                                                                                                                                                                                                                                                                                |                                                                                                   |                    |
|              | Nickel-copper alloys                   |                                                                                                                                                                                                                                                                                              | <b>331423</b> (2007);<br><b>33142</b> (2008-2011);<br><b>331420</b> (2012-2016)                                                                                                                                                                                                                                                                                                                                                                                             |                                                                                                   |                    |

| Commodity | Application category             | Application description                                                    | Associated NAICS codes<br>(applicable years)                                                                                                                                                                                                                                                                                                                                                                                                                                                                                                                                                                                                                                                 | U.S. demand fraction |            |
|-----------|----------------------------------|----------------------------------------------------------------------------|----------------------------------------------------------------------------------------------------------------------------------------------------------------------------------------------------------------------------------------------------------------------------------------------------------------------------------------------------------------------------------------------------------------------------------------------------------------------------------------------------------------------------------------------------------------------------------------------------------------------------------------------------------------------------------------------|----------------------|------------|
|           |                                  |                                                                            |                                                                                                                                                                                                                                                                                                                                                                                                                                                                                                                                                                                                                                                                                              | Notes                | References |
|           | Other nickel alloys              |                                                                            | <b>331491</b> (2007, 2012-2016);<br><b>33149</b> (2008-2011);<br><b>331522</b> (2007);<br><b>331523</b> (2012-2016);<br><b>331528</b> (2007);<br><b>331529</b> (2012-2016);<br><b>33152</b> (2008-2011);<br><b>332112</b> (2007, 2012-2016);                                                                                                                                                                                                                                                                                                                                                                                                                                                 |                      |            |
|           | Steels (mainly stainless steels) |                                                                            | <b>331111</b> (2007);<br><b>33111</b> (2008-2011);<br><b>331110</b> (2012-2016);<br><b>331210</b> (2007-2016);<br><b>331512</b> (2007, 2012-2016);<br><b>331513</b> (2007, 2012-2016);<br><b>33151</b> (2008-2011);<br><b>331221</b> (2007, 2012-2016);<br><b>331222</b> (2007, 2012-2016);<br><b>33122</b> (2008-2011);<br><b>332111</b> (2007, 2012-2016);<br><b>332114</b> (2007, 2012-2016);<br><b>33211</b> (2008-2011);<br><b>332214</b> (2007);<br><b>332215</b> (2012);<br><b>33221</b> (2008-2011, 2013-2016);<br><b>332912</b> (2007, 2012-2016);<br><b>332919</b> (2007, 2012-2016);<br><b>33291</b> (2008-2011);<br><b>332999</b> (2007, 2012-2016);<br><b>33299</b> (2008-2011) |                      |            |
|           | Superalloys                      |                                                                            | <b>331492</b> (2007, 2012-2016);<br><b>33149</b> (2008-2011);<br><b>332117</b> (2007-2016);<br><b>333611</b> (2007-2016);<br><b>336412</b> (2007-2016)                                                                                                                                                                                                                                                                                                                                                                                                                                                                                                                                       |                      |            |
|           | Other (mainly batteries)         |                                                                            | <b>335911</b> (2007-2016);<br><b>332812</b> (2007, 2012-2016);<br><b>33281</b> (2008-2011)                                                                                                                                                                                                                                                                                                                                                                                                                                                                                                                                                                                                   |                      |            |
| Niobium   | Steels, alloys, and superalloys  | Additive to steels, superalloys, and other alloys                          | <b>331111</b> (2007);<br><b>331112</b> (2007);<br><b>33111</b> (2008-2011);<br><b>331110</b> (2012-2016);<br><b>331221</b> (2007, 2012-2016);<br><b>331222</b> (2007, 2012-2016);<br><b>33122</b> (2008-2011)                                                                                                                                                                                                                                                                                                                                                                                                                                                                                |                      |            |
| Palladium | Automotive                       | Catalysts in catalytic converters used to treat vehicle exhaust emissions, | <b>336399</b> (2007-2011);                                                                                                                                                                                                                                                                                                                                                                                                                                                                                                                                                                                                                                                                   | Demand fractions     | (407)      |

| Commodity | Application category     | Application description                                                                                                                                                                                                                                                                                                                                 | Associated NAICS codes<br>(applicable years)                                                                                                                                                                                                                                                              | U.S. demand fraction                                                                    |            |
|-----------|--------------------------|---------------------------------------------------------------------------------------------------------------------------------------------------------------------------------------------------------------------------------------------------------------------------------------------------------------------------------------------------------|-----------------------------------------------------------------------------------------------------------------------------------------------------------------------------------------------------------------------------------------------------------------------------------------------------------|-----------------------------------------------------------------------------------------|------------|
|           |                          |                                                                                                                                                                                                                                                                                                                                                         |                                                                                                                                                                                                                                                                                                           | Notes                                                                                   | References |
|           |                          | particularly hydrocarbon control in gasoline engines                                                                                                                                                                                                                                                                                                    | <b>336390</b> (2012-2016)                                                                                                                                                                                                                                                                                 | based on reported fabrication demand for the United States as reported by the reference |            |
|           | Chemical                 | Process catalysts mainly used in the manufacture of hydrogen peroxide, acetaldehyde (Wacker-Hoechst process), purified terephthalic acid (PTA), vinyl acetate monomer (VAM); catchment gauzes to recover Pt and Rh in nitric acid production; as well as fine and specialty chemicals such as vitamins, antibiotics, anti-inflammatory drugs, and dyes. | <b>325188</b> (2007-2011);<br><b>325180</b> (2012-2016)<br><b>325199</b> (2007, 2012-2016);<br><b>32519</b> (2008-2011);<br><b>325311</b> (2007-2016);<br><b>325412</b> (2007-2016);<br><b>325132</b> (2007);<br><b>32513</b> (2008-2011);<br><b>325130</b> (2012-2016)                                   |                                                                                         |            |
|           | Dental & medical         | Fabrication metal and alloying agent in dental restorations, such as crowns and bridges                                                                                                                                                                                                                                                                 | <b>339114</b> (2007-2016);<br><b>339116</b> (2007-2016)                                                                                                                                                                                                                                                   |                                                                                         |            |
|           | Electrical & electronics | Conductive paste in multilayer ceramic capacitors (MLCC), now mainly for military and medical applications; conductive tracks in hybrid integrated circuits; and plating of electronic components including lead-frames and connectors                                                                                                                  | <b>334414</b> (2007-2011);<br><b>334416</b> (2012-2016);<br><b>334413</b> (2007-2016);<br><b>334412</b> (2007-2016);<br><b>334417</b> (2007-2016);<br><b>334418</b> (2007-2016);<br><b>334419</b> (2007-2016);<br><b>334519</b> (2007-2016);<br><b>335931</b> (2007, 2012-2016); <b>33593</b> (2008-2011) |                                                                                         |            |
|           | Jewelry                  | Fabrication metal for palladium jewelry and whiting agent in white gold alloys                                                                                                                                                                                                                                                                          | <b>339911</b> (2007);<br><b>339912</b> (2007);<br><b>339913</b> (2007);<br><b>339914</b> (2007);<br><b>33991</b> (2008-2011);<br><b>339910</b> (2012-2016)                                                                                                                                                |                                                                                         |            |
|           | Petroleum                | Hydrocracking catalysts                                                                                                                                                                                                                                                                                                                                 | <b>324110</b> (2007-2016)                                                                                                                                                                                                                                                                                 |                                                                                         |            |
|           | Other                    | Catalyst for non-road engine emissions control                                                                                                                                                                                                                                                                                                          | <b>333618</b> (2007-2016)                                                                                                                                                                                                                                                                                 |                                                                                         |            |
| Phosphate | Fertilizer               | Wet-process phosphoric acid and superphosphoric acid for fertilizer application                                                                                                                                                                                                                                                                         | <b>325311</b> (2007-2016);<br><b>325312</b> (2007-2016);<br><b>325314</b> (2007-2016)                                                                                                                                                                                                                     |                                                                                         |            |
|           | Other                    | Various uses including animal feed supplements, sanitation and surface-active agent manufacturing, and other chemical uses                                                                                                                                                                                                                              | <b>311111</b> (2007-2016);<br><b>311119</b> (2007-2016);<br><b>325188</b> (2007-2011);<br><b>325180</b> (2012-2016);<br><b>325611</b> (2007, 2012-2016);<br><b>325612</b> (2007, 2012-2016);<br><b>325613</b> (2007, 2012-2016);<br><b>32561</b> (2008-2011)                                              |                                                                                         |            |

| Commodity | Application category     | Application description                                                                                                                                                                                                                                                                                                                            | Associated NAICS codes<br>(applicable years)                                                                                                                                                                                                                                                                                                                             | U.S. demand fraction                                                                                     |            |
|-----------|--------------------------|----------------------------------------------------------------------------------------------------------------------------------------------------------------------------------------------------------------------------------------------------------------------------------------------------------------------------------------------------|--------------------------------------------------------------------------------------------------------------------------------------------------------------------------------------------------------------------------------------------------------------------------------------------------------------------------------------------------------------------------|----------------------------------------------------------------------------------------------------------|------------|
|           |                          |                                                                                                                                                                                                                                                                                                                                                    |                                                                                                                                                                                                                                                                                                                                                                          | Notes                                                                                                    | References |
| Platinum  | Automotive               | Catalysts in catalytic converters used to reduce vehicle exhaust emissions, especially for diesel engines, as well as platinum-tipped electrode for automotive spark plugs and coating for oxygen sensors                                                                                                                                          | <b>336399</b> (2007-2011);<br><b>336390</b> (2012-2016);<br><b>336322</b> (2007);<br><b>33632</b> (2008-2011);<br><b>336320</b> (2012-2016)                                                                                                                                                                                                                              | Demand fractions based on reported fabrication demand for the United States as reported by the reference | (407)      |
|           | Chemical                 | Catalysts in the production of specialty silicones; para-xylene; nitric acid and hydrocyanic acid, as well as a variety of bulk and specialty chemicals.                                                                                                                                                                                           | <b>325212</b> (2007-2016);<br><b>325110</b> (2007-2016);<br><b>325311</b> (2007-2016);<br><b>325199</b> (2007, 2012-2016); <b>32519</b> (2008-2011);<br><b>325188</b> (2007-2011);<br><b>325180</b> (2012-2016)                                                                                                                                                          |                                                                                                          |            |
|           | Dental & medical         | Alloying agent in dental alloys; biomedical devices including pacemakers, defibrillator; catheters and stents; anticancer drugs (e.g., cisplatin and carboplatin)                                                                                                                                                                                  | <b>339114</b> (2007-2016);<br><b>339116</b> (2007-2016);<br><b>334510</b> (2007-2016);<br><b>339112</b> (2007-2016);<br><b>339113</b> (2007-2016);<br><b>325412</b> (2007-2016)                                                                                                                                                                                          |                                                                                                          |            |
|           | Electrical & electronics | Alloy coating for computer hard disk drives; used in varistors, bond wires, capacitors, and contact materials such as switches and relays, electroplated parts such as on printed circuit boards, and electrode coating in fuel cells; as well as thermocouples for process control mainly used in the glass, semiconductors, and steel industries | <b>334112</b> (2007-2016);<br><b>334412</b> (2007-2016);<br><b>334413</b> (2007-2016);<br><b>334414</b> (2007-2011);<br><b>334416</b> (2012-2016);<br><b>334417</b> (2007-2016);<br><b>334418</b> (2007-2016);<br><b>334419</b> (2007-2016);<br><b>334519</b> (2007-2016);<br><b>335931</b> (2007, 2012-2016);<br><b>33593</b> (2008-2011);<br><b>334513</b> (2007-2016) |                                                                                                          |            |
|           | Glass                    | Fabrication metal for glass manufacturing equipment used in the manufacture of technical, optical, fiberglass, and specialty glass including glass for liquid crystal displays (LCDs)                                                                                                                                                              | <b>333298</b> (2007);<br><b>33329N</b> (2008-2011);<br><b>333249</b> (2012-2016)                                                                                                                                                                                                                                                                                         |                                                                                                          |            |
|           | Jewelry                  | Fabrication metal and alloying agent in jewelry and decorative applications                                                                                                                                                                                                                                                                        | <b>339911</b> (2007);<br><b>339912</b> (2007);<br><b>339913</b> (2007);<br><b>339914</b> (2007);<br><b>33991</b> (2008-2011);<br><b>339910</b> (2012-2016)                                                                                                                                                                                                               |                                                                                                          |            |
|           | Petroleum                | Catalysts used in petroleum refinery processes including reforming (i.e., Pt-Re, Pt-Ir, Pt-Sn) and isomerization                                                                                                                                                                                                                                   | <b>324110</b> (2007-2016)                                                                                                                                                                                                                                                                                                                                                |                                                                                                          |            |
|           | Other                    | Turbine blade casting and coating. Other uses such as catalysts for industrial pollution control, coatings for corrosion resistance, and alloys for magnets are assumed to be relatively minor.                                                                                                                                                    | <b>333611</b> (2007-2016);<br><b>336412</b> (2007-2016)                                                                                                                                                                                                                                                                                                                  |                                                                                                          |            |

| Commodity    | Application category | Application description                                                                                                                                                                                                                                                                                                                      | Associated NAICS codes<br>(applicable years)                                                                                                                                                                                                                                                                                                                        | U.S. demand fraction                                                                                                     |            |
|--------------|----------------------|----------------------------------------------------------------------------------------------------------------------------------------------------------------------------------------------------------------------------------------------------------------------------------------------------------------------------------------------|---------------------------------------------------------------------------------------------------------------------------------------------------------------------------------------------------------------------------------------------------------------------------------------------------------------------------------------------------------------------|--------------------------------------------------------------------------------------------------------------------------|------------|
|              |                      |                                                                                                                                                                                                                                                                                                                                              |                                                                                                                                                                                                                                                                                                                                                                     | Notes                                                                                                                    | References |
| Potash       | Fertilizer           | Fertilizers (potassium chloride, potassium sulfate, and potassium magnesium sulfate) used in agriculture (415)                                                                                                                                                                                                                               | 325311 (2007-2016);<br>325312 (2007-2016);<br>325314 (2007-2016)                                                                                                                                                                                                                                                                                                    | U.S. demand fractions are assumed to be 85% fertilizer and 15% for use in other applications are noted by the references | (117-123)  |
|              | Other                | Various chemical and industrial applications including animal feed supplements, secondary aluminum refining, oil-well drilling mud, soap manufacturing, steel heat-treating, pharmaceuticals, catalysts for synthetic rubber manufacturing, beer brewing, and fire extinguishers, to name a few (415)                                        | 311111 (2007-2016);<br>311119 (2007-2016);<br>312120 (2007-2016);<br>325188 (2007-2011);<br>325180 (2012-2016);<br>325212 (2007-2016);<br>325412 (2007-2016);<br>325611 (2007, 2012-2016);<br>32561 (2008-2011);<br>325998 (2007, 2012-2016);<br>32599 (2008-2011);<br>331314 (2007-2016);<br>332811 (2007, 2012-2016);<br>33281 (2008-2011);<br>339999 (2007-2016) |                                                                                                                          |            |
| Praseodymium | Batteries            | Additive to nickel-metal-hydride (NiMH) battery alloys, which are used to power portable electronics, hybrid electric vehicles, and power tools, among others                                                                                                                                                                                | 335911 (2015, 2016);                                                                                                                                                                                                                                                                                                                                                | See section on rare earth demand and net imports in this document for details                                            | (565)      |
|              | Ceramics             | Additive to cubic zirconia for jewelry                                                                                                                                                                                                                                                                                                       | 339910 (2015, 2016)                                                                                                                                                                                                                                                                                                                                                 |                                                                                                                          |            |
|              | Magnets              | Used somewhat interchangeably with neodymium in neodymium-iron-boron permanent magnets used in various automotive applications (including drivetrain in electric and hybrid electric vehicles, electric power steering, etc.), consumer electronics (e.g., hard disk drives), off-shore wind turbines, air-conditioners, and many other uses | 335312 (2015, 2016);<br>334112 (2015, 2016);<br>333611 (2015, 2016);<br>336330 (2015, 2016);<br>334210 (2015, 2016);<br>336350 (2015, 2016);<br>333415 (2015, 2016);<br>336991 (2015, 2016);<br>333249 (2015, 2016);<br>334510 (2015, 2016);<br>333912 (2015, 2016);<br>333993 (2015, 2016);<br>335314 (2015, 2016);<br>33522 (2015, 2016);<br>336510 (2015, 2016)  |                                                                                                                          |            |
|              | Metallurgy           | Mischmetal used as an additive to steel and iron, as well as other metallurgical applications, especially magnesium alloys (565)                                                                                                                                                                                                             | 331110 (2015, 2016);<br>336999 (2015, 2016);<br>339999 (2015, 2016)                                                                                                                                                                                                                                                                                                 |                                                                                                                          |            |
|              | Pigments             | Praseodymium pigment for ceramic tiles                                                                                                                                                                                                                                                                                                       | 325130 (2015, 2016)                                                                                                                                                                                                                                                                                                                                                 |                                                                                                                          |            |

| Commodity | Application category                       | Application description                                                                                                                                                                                                                                                                                                                                                   | Associated NAICS codes (applicable years)                                                                                                                  | U.S. demand fraction                                                                             |                    |
|-----------|--------------------------------------------|---------------------------------------------------------------------------------------------------------------------------------------------------------------------------------------------------------------------------------------------------------------------------------------------------------------------------------------------------------------------------|------------------------------------------------------------------------------------------------------------------------------------------------------------|--------------------------------------------------------------------------------------------------|--------------------|
|           |                                            |                                                                                                                                                                                                                                                                                                                                                                           |                                                                                                                                                            | Notes                                                                                            | References         |
|           | Polishing                                  | Minor quantities used in cerium-oxide-based polishing powders                                                                                                                                                                                                                                                                                                             | <b>334220</b> (2015, 2016);<br><b>339115</b> (2015, 2016);<br><b>334413</b> (2015, 2016)                                                                   |                                                                                                  |                    |
|           | Other                                      | Minor quantities used in fiber optic manufacturing                                                                                                                                                                                                                                                                                                                        | <b>335921</b> (2015, 2016)                                                                                                                                 |                                                                                                  |                    |
| Rhenium   | High-temperature turbine engine components | Additive to single crystal superalloy used in high-temperature turbine engine components                                                                                                                                                                                                                                                                                  | <b>331492</b> (2007, 2012-2016);<br><b>33149</b> (2008-2011);<br><b>333611</b> (2007-2016);<br><b>336412</b> (2007-2016)                                   | Demand fractions are based on estimated consumption of rhenium by application                    | (117–123, 198–200) |
|           | Catalyst                                   | Bimetallic platinum-rhenium catalyst used in petroleum reforming                                                                                                                                                                                                                                                                                                          | <b>324110</b> (2007-2016)                                                                                                                                  |                                                                                                  |                    |
|           | Other                                      | Mainly other rhenium alloys (e.g., tungsten-rhenium) used in a variety of applications                                                                                                                                                                                                                                                                                    | <b>331491</b> (2007, 2012-2016);<br><b>33149</b> (2008-2011)                                                                                               |                                                                                                  |                    |
| Rhodium   | Automotive                                 | Catalysts in catalytic converters used to reduce vehicle NO <sub>x</sub> emissions                                                                                                                                                                                                                                                                                        | <b>336399</b> (2007-2011);<br><b>336390</b> (2012-2016)                                                                                                    | Demand fractions are based on reported fabrication demand for the United States by the reference | (407)              |
|           | Chemical                                   | Process catalysts mainly used in the production of acetic acid (Monsanto process, carbonylation), n-aldehydes (oxo synthesis, hydroformylation), and acetic anhydride (Hoechst/Halcon process), as well as in hydrogenation (Wilkinson's catalyst); and the production of nitric acid and hydrogen cyanide                                                                | <b>325199</b> (2007, 2012-2016);<br><b>32519</b> (2008-2011);<br><b>325311</b> (2007-2016)                                                                 |                                                                                                  |                    |
|           | Electrical & electronics                   | Alloying agent in industrial thermocouples; electrical contacts including sliding contacts such as in electric motors, switches and relays such as in process automation, and reed contacts such as in automotive electronics                                                                                                                                             | <b>334513</b> (2007-2016);<br><b>335931</b> (2007, 2012-2016); <b>33593</b> (2008-2011)                                                                    |                                                                                                  |                    |
|           | Glass                                      | Alloying agent with platinum for fabricated parts used in glass manufacturing equipment, especially technical and specialty glass                                                                                                                                                                                                                                         | <b>333298</b> (2007);<br><b>33329N</b> (2008-2011);<br><b>333249</b> (2012-2016)                                                                           |                                                                                                  |                    |
|           | Other                                      | Electroplated parts mainly for decorative purposes, especially jewelry                                                                                                                                                                                                                                                                                                    | <b>339911</b> (2007);<br><b>339912</b> (2007);<br><b>339913</b> (2007);<br><b>339914</b> (2007);<br><b>33991</b> (2008-2011);<br><b>339910</b> (2012-2016) |                                                                                                  |                    |
| Ruthenium | Chemical                                   | Process catalysts used in the synthesis of ammonia (KBR Advanced Ammonia Process); synthesis of acetic acid (Cativa® process), synthesis of hydrocarbons (Fisher-Tropsch process), synthesis of caprolactam and adipic acid as a feedstock for nylon 6 and nylon 66 (predominantly in China, thus excluded here), hydrogenation, oxidation, and hydrogenolysis reactions. | <b>325311</b> (2007-2016);<br><b>325199</b> (2007, 2012-2016);<br><b>32519</b> (2008-2011)                                                                 | Demand fractions are based on global data due to lack of data for the United States              | (580–582)          |
|           | Electrical & electronics                   | Resistive component of thick-film pastes used in hybrid integrated circuits and chip resistors, electrode coating in fuel cell stacks; sputtering targets for coating of hard disk drives. Other uses, such as ruthenium used in imageable thick-film paste for plasma display panels, are assumed to be relatively minor especially since the early 2010s.               | <b>334413</b> (2007-2016);<br><b>334112</b> (2007-2016)                                                                                                    |                                                                                                  |                    |

| Commodity | Application category       | Application description                                                                                                                                                                                                                                                                                                                                                                                | Associated NAICS codes<br>(applicable years)                                                                                                                                                                                                                                         | U.S. demand fraction                                                                                                                                                                                                                                            |            |
|-----------|----------------------------|--------------------------------------------------------------------------------------------------------------------------------------------------------------------------------------------------------------------------------------------------------------------------------------------------------------------------------------------------------------------------------------------------------|--------------------------------------------------------------------------------------------------------------------------------------------------------------------------------------------------------------------------------------------------------------------------------------|-----------------------------------------------------------------------------------------------------------------------------------------------------------------------------------------------------------------------------------------------------------------|------------|
|           |                            |                                                                                                                                                                                                                                                                                                                                                                                                        |                                                                                                                                                                                                                                                                                      | Notes                                                                                                                                                                                                                                                           | References |
|           | Electrochemical            | Coating for dimensionally stable anodes used in the diaphragm and membrane technology of the chlor-alkali industry (chlorine and sodium hydroxide manufacture) and sodium chlorate production.                                                                                                                                                                                                         | <b>325181</b> (2007-2011);<br><b>325180</b> (2012-2016)                                                                                                                                                                                                                              |                                                                                                                                                                                                                                                                 |            |
|           | Other                      | Alloying agent in platinum jewelry; alloying agent in dentistry; alloying agent that provides corrosion-resistance for titanium piping for offshore oil and geothermal production. Other applications such as ruthenium's use in specialty alloys for aerospace and machining applications and corrosion-resistance for shipping vessels and underwater structures are assumed to be relatively minor. | <b>339911</b> (2007);<br><b>339912</b> (2007);<br><b>339913</b> (2007);<br><b>339914</b> (2007);<br><b>33991</b> (2008-2011);<br><b>339910</b> (2012-2016);<br><b>339114</b> (2007-2015);<br><b>339116</b> (2007-2016);<br><b>331491</b> (2007, 2012-2106); <b>33149</b> (2008-2011) |                                                                                                                                                                                                                                                                 |            |
| Samarium  | Magnets                    | Samarium cobalt (SmCo) permanent magnets used in servo-motors, medical devices, consumer electronics, and other uses                                                                                                                                                                                                                                                                                   | <b>335312</b> (2015, 2016);<br><b>334510</b> (2015, 2016);<br><b>334111</b> (2015, 2016);<br><b>334511</b> (2015, 2016);<br><b>339999</b> (2015, 2016)                                                                                                                               | See section on rare earth demand and net imports in this document for details                                                                                                                                                                                   | (565)      |
| Selenium  | Agriculture and biological | Additive to fertilizer, soils, and animal feed as a micronutrient, dietary supplement, and as a fungicide to control dandruff and dermatitis (593)                                                                                                                                                                                                                                                     | <b>311119</b> (2007-2016);<br><b>325311</b> (2007-2016);<br><b>325312</b> (2007-2016);<br><b>325314</b> (2007-2016);<br><b>325411</b> (2007-2016);<br><b>325412</b> (2007-2016);                                                                                                     | Demand fractions are based on global estimates by the reference (for all years) with the exception of electrolytic manganese, which is assumed to not be an application in the United States. Fractions are thus renormalized without this application category | (593)      |
|           | Electrical                 | Photoreceptors in photocopiers and laser printers, infrared detectors, solar photovoltaics (copper-indium-gallium-diselenide), rectifiers, x-ray receptors (593)                                                                                                                                                                                                                                       | <b>333315</b> (2007-2011);<br><b>333316</b> (2012-2016);<br><b>334119</b> (2007-2009);<br><b>33341</b> (2010, 2011);<br><b>334118</b> (2012-2016);<br><b>334413</b> (2007-2016);<br><b>334517</b> (2007-2016)                                                                        |                                                                                                                                                                                                                                                                 |            |
|           | Glass                      | Decolorizing container and other silica glass, provides red color art glass, and reduces solar heat for architectural glass (593)                                                                                                                                                                                                                                                                      | <b>327211</b> (2007-2016);<br><b>327212</b> (2007-2016);<br><b>327213</b> (2007-2016);<br><b>327215</b> (2007-2016)                                                                                                                                                                  |                                                                                                                                                                                                                                                                 |            |
|           | Metallurgy                 | Microalloying additive to improve machinability of stainless steel, carbon steel, and copper (594)                                                                                                                                                                                                                                                                                                     | <b>331</b> (2007);<br><b>33111</b> (2008-2011);<br><b>331110</b> (2012-2016);<br><b>33142</b> (2008-2011);<br><b>331410</b> (2012-2016)<br><b>33142</b> (2008-2011);<br><b>331420</b> (2012-2016);                                                                                   |                                                                                                                                                                                                                                                                 |            |
|           | Pigments                   | Cadmium sulfoselenide pigments in plastics, ceramics, glazes and paints (593)                                                                                                                                                                                                                                                                                                                          | <b>325131</b> (2007);<br><b>32513</b> (2008-2011);<br><b>325130</b> (2012-2016)                                                                                                                                                                                                      |                                                                                                                                                                                                                                                                 |            |



| Commodity | Application category                  | Application description                                                                                                                                                                                                    | Associated NAICS codes<br>(applicable years)                                                                                                                                                                                                                                                                                                                                                                      | U.S. demand fraction                                                                                                                                                                               |            |
|-----------|---------------------------------------|----------------------------------------------------------------------------------------------------------------------------------------------------------------------------------------------------------------------------|-------------------------------------------------------------------------------------------------------------------------------------------------------------------------------------------------------------------------------------------------------------------------------------------------------------------------------------------------------------------------------------------------------------------|----------------------------------------------------------------------------------------------------------------------------------------------------------------------------------------------------|------------|
|           |                                       |                                                                                                                                                                                                                            |                                                                                                                                                                                                                                                                                                                                                                                                                   | Notes                                                                                                                                                                                              | References |
|           | Other                                 | Catalysts for selective oxidation, plating solutions, steel bluing, and blasting caps (593)                                                                                                                                | 325188 (2007-2011);<br>325180 (2012-2016);<br>325920 (2007-2016);<br>325612 (2007, 2012-2016);<br>32561 (2008-2011);<br>332813 (2007, 2012-2016);<br>33281 (2008-2011)                                                                                                                                                                                                                                            |                                                                                                                                                                                                    |            |
| Silver    | Brazing alloys and solder             | Silver-containing brazes and solders to produce electrically conductive and corrosion-resistant joints used in a variety of applications ranging from air-conditioners and refrigerators to automobiles and aircraft (595) | 325998 (2007, 2012-2016);<br>32599 (2008-2011)                                                                                                                                                                                                                                                                                                                                                                    | Demand fractions are based on U.S. consumption of silver (including scrap) by end-use as reported by the references. For years 2007-2011, solar photovoltaics are included in the "other" category | (447-449)  |
|           | Catalysts                             | Catalysts mainly for use in ethylene oxide production                                                                                                                                                                      | 325199 (2007, 2012-2016);<br>32519 (2008-2011)                                                                                                                                                                                                                                                                                                                                                                    |                                                                                                                                                                                                    |            |
|           | Electrical and electronics            | Virtually all electronic devices utilize silver for its superior electrical conductivity. This category also includes silver used in batteries.                                                                            | 334 (2007-2016);<br>335 (2007-2016);<br>336321 (2007);<br>336322 (2007);<br>33632 (2008-2011);<br>336320 (2012-2016)                                                                                                                                                                                                                                                                                              |                                                                                                                                                                                                    |            |
|           | Jewelry, silverware, coins and medals | Various jewelry, silverware, coins, and medals                                                                                                                                                                             | 339911 (2007);<br>339912 (2007);<br>339913 (2007);<br>339914 (2007);<br>33911 (2008-2011);<br>339910 (2012-2016)                                                                                                                                                                                                                                                                                                  |                                                                                                                                                                                                    |            |
|           | Photography                           | Photographic film and paper                                                                                                                                                                                                | 325992 (2007, 2012-2016);<br>32599 (2008-2011)                                                                                                                                                                                                                                                                                                                                                                    |                                                                                                                                                                                                    |            |
|           | Solar Photovoltaic                    | Conductive paste for silicon solar photovoltaics                                                                                                                                                                           | 334413 (2007-2016)                                                                                                                                                                                                                                                                                                                                                                                                |                                                                                                                                                                                                    |            |
|           | Other                                 | Various uses including antimicrobial bandages, dental amalgam, pharmaceuticals, high-performance spark plugs, water treatment, to name a few                                                                               | 339113 (2007-2016);<br>339114 (2007-2016);<br>339116 (2007-2016);<br>325412 (2007-2016);<br>336322 (2007);<br>33632 (2008-2011);<br>336320 (2012-2016);<br>325612 (2007, 2012-2016);<br>32561 (2008-2011);<br>332813 (2007, 2012-2016);<br>33281 (2008-2011);<br>325188 (2007-2011);<br>325180 (2012-2016);<br>332999 (2007, 2012-2016);<br>33299 (2008-2011);<br>331491 (2007, 2012-2016);<br>33149 (2008-2011); |                                                                                                                                                                                                    |            |
| Strontium | Drilling fluids                       | Celestite as an additive in drilling muds, which is an alternative to barite                                                                                                                                               | 325998 (2007, 2012-2016);                                                                                                                                                                                                                                                                                                                                                                                         | Demand fractions                                                                                                                                                                                   | (451)      |

| Commodity | Application category            | Application description                                                                                                                                                                                                                                                                                                                           | Associated NAICS codes<br>(applicable years)                                                                                                                                                                                                                 | U.S. demand fraction                                                                                        |            |
|-----------|---------------------------------|---------------------------------------------------------------------------------------------------------------------------------------------------------------------------------------------------------------------------------------------------------------------------------------------------------------------------------------------------|--------------------------------------------------------------------------------------------------------------------------------------------------------------------------------------------------------------------------------------------------------------|-------------------------------------------------------------------------------------------------------------|------------|
|           |                                 |                                                                                                                                                                                                                                                                                                                                                   |                                                                                                                                                                                                                                                              | Notes                                                                                                       | References |
|           |                                 | (451)                                                                                                                                                                                                                                                                                                                                             | 32599 (2008-2011)                                                                                                                                                                                                                                            | are based on information provided in the reference and further discussion with the authors of the reference |            |
|           | Electrolytic production of zinc | Strontium carbonate added to reduce the “lead content of the electrolyte and of the zinc deposited on the cathode” (451)                                                                                                                                                                                                                          | 331 (2007);<br>33141 (2008-2011);<br>331410 (2012-2016)                                                                                                                                                                                                      |                                                                                                             |            |
|           | Ferrite ceramic magnets         | Ferrite ceramic magnets used in small direct current motors for automobiles windshield wipers, loudspeakers, and other electronic equipment (451)                                                                                                                                                                                                 | 327112 (2007, 2008, 2010, 2011)<br>32711 (2009);<br>326110 (2012-2016);<br>334310 (2007-2016);<br>336322 (2007)<br>33632 (2008-2011);<br>336320 (2012-2016)                                                                                                  |                                                                                                             |            |
|           | Master alloys                   | Strontium metal added to aluminum alloys, to improve strength and ductility, for use in the automotive applications (451)                                                                                                                                                                                                                         | 331314 (2007-2016);<br>331319 (2007);<br>33131 (2008-2011);<br>331318 (2012-2016);<br>332510 (2007-2016);<br>333924 (2007, 2012-2016);<br>33392 (2011-2015);<br>336211 (2007-2016)                                                                           |                                                                                                             |            |
|           | Pigments and fillers            | Strontium used in pigments, paints, and phosphors (451)                                                                                                                                                                                                                                                                                           | 325510 (2007-2016);<br>334290 (2007-2016);<br>339950 (2007-2016);<br>325131 (2007, 2012-2016);<br>32513 (2008-2011);<br>335110 (2007-2016)                                                                                                                   |                                                                                                             |            |
|           | Pyrotechnics and signals        | Strontium nitrate used in flares, fireworks, and traces in ammunition (451)                                                                                                                                                                                                                                                                       | 325998 (2007, 2012-2016);<br>32599 (2008-2011)                                                                                                                                                                                                               |                                                                                                             |            |
|           | Other                           | Various uses including medical applications (e.g., strontium-89 for treatment of bone cancer), toothpastes, frits in ceramic glazes, glass modified to improve optical properties, fiberglass, laboratory and pharmaceutical glass, substrate in semiconductors, wireless devices and memory chips, and analytical chemistry laboratory use (451) | 325412 (2007-2016);<br>325611 (2007, 2012-2016);<br>32561 (2008-2011);<br>327122 (2007-2011);<br>327120 (2012-2016)<br>327215 (2007-2016);<br>327212 (2007-2016);<br>334413 (2007-2016);<br>333314 (2007-2016);<br>334419 (2007-2016);<br>334516 (2007-2016) |                                                                                                             |            |
| Tantalum  | Alloy additive                  | Additive to certain nickel- and cobalt-based superalloys mainly use in aircraft engine and land-based gas turbines                                                                                                                                                                                                                                | 331492 (2007, 2012-2016);<br>33149 (2008-2011);<br>332117 (2007-2016);<br>333611 (2007-2016);<br>336412 (2007-2016)                                                                                                                                          |                                                                                                             |            |
|           | Capacitors                      | Capacitor-grade tantalum powder and tantalum wire for electronic capacitors used in consumer electronics (e.g., cellular phones, computers,                                                                                                                                                                                                       | 333315 (2007-2011);<br>333316 (2012-2016);                                                                                                                                                                                                                   |                                                                                                             |            |

| Commodity | Application category | Application description                                                                                                                                                                                                                                   | Associated NAICS codes<br>(applicable years)                                                                                                                                                                                                                                                                                                                                                                                                                                                                                                                                                                                                                                                                                                       | U.S. demand fraction                                                        |            |
|-----------|----------------------|-----------------------------------------------------------------------------------------------------------------------------------------------------------------------------------------------------------------------------------------------------------|----------------------------------------------------------------------------------------------------------------------------------------------------------------------------------------------------------------------------------------------------------------------------------------------------------------------------------------------------------------------------------------------------------------------------------------------------------------------------------------------------------------------------------------------------------------------------------------------------------------------------------------------------------------------------------------------------------------------------------------------------|-----------------------------------------------------------------------------|------------|
|           |                      |                                                                                                                                                                                                                                                           |                                                                                                                                                                                                                                                                                                                                                                                                                                                                                                                                                                                                                                                                                                                                                    | Notes                                                                       | References |
|           |                      | cameras, televisions), medical devices (e.g., pacemakers and hearing aids), automotive electronics (e.g., airbag activation, engine management modules, etc.), and other electronic equipment (cellular phone base stations, power rectifiers, etc.) (11) | <b>334111</b> (2007, 2012-2016);<br><b>334112</b> (2007, 2012-2016);<br><b>344113</b> (2007);<br><b>334118</b> (2012-2016);<br><b>334119</b> (2007);<br><b>333411</b> (2008-2011);<br><b>334210</b> (2007, 2009-2016);<br><b>334220</b> (2007, 2009-2016);<br><b>334290</b> (2007, 2009-2016);<br><b>3342</b> (2008);<br><b>334310</b> (2007-2016);<br><b>334416</b> (2007-2016);<br><b>334510</b> (2007-2016);<br><b>334511</b> (2007-2016);<br><b>334512</b> (2007-2016);<br><b>334513</b> (2007-2016);<br><b>334514</b> (2007-2016);<br><b>334515</b> (2007-2016);<br><b>334516</b> (2007-2016);<br><b>334517</b> (2007-2016);<br><b>334519</b> (2007-2016);<br><b>336322</b> (2007);<br><b>33632</b> (2008-2011);<br><b>336320</b> (2012-2016) | specific for the United States for the years of analysis are not available. |            |
|           | Cemented carbides    | Cemented carbides used in cutting and drilling tools used by the mining, construction, automotive, and aerospace sectors                                                                                                                                  | <b>333131</b> (2007, 2012-2016);<br><b>333132</b> (2007, 2012-2016);<br><b>33313</b> (2008-2011);<br><b>333511</b> (2007-2016);<br><b>333514</b> (2007-2016);<br><b>333515</b> (2007-2016);<br><b>332213</b> (2007);<br><b>33221</b> (2008-2011);<br><b>332216</b> (2012-216)                                                                                                                                                                                                                                                                                                                                                                                                                                                                      |                                                                             |            |
|           | Chemicals            | Various chemicals including tantalum oxide used in optical lenses and lithium tantalate for surface acoustic wave (SAW) filters (11)                                                                                                                      | <b>333314</b> (2007-2016);<br><b>334419</b> (2007-2016);<br><b>325188</b> (2007-2011);<br><b>325180</b> (2012-2016)                                                                                                                                                                                                                                                                                                                                                                                                                                                                                                                                                                                                                                |                                                                             |            |
|           | Mill products        | Chemical processing equipment (e.g., heat exchangers, valves, process vessels, cladding, etc.), medical applications (e.g., prosthetics, sutures, stents, etc.), and nuclear waste containers (11)                                                        | <b>332410</b> (2007-2016);<br><b>332420</b> (2007-2016);<br><b>332313</b> (2007, 2012-2016);<br><b>33231</b> (2008-2011);<br><b>332911</b> (2007, 2012-2016);<br><b>33291</b> (2008-2011);<br><b>333298</b> (2007);<br><b>33329</b> (2008-2011);<br><b>333249</b> (2012-2016);                                                                                                                                                                                                                                                                                                                                                                                                                                                                     |                                                                             |            |

| Commodity | Application category           | Application description                                                                                                                                                                                                                                    | Associated NAICS codes<br>(applicable years)                                                                                                                                                                 | U.S. demand fraction                                                                                                                                       |                |
|-----------|--------------------------------|------------------------------------------------------------------------------------------------------------------------------------------------------------------------------------------------------------------------------------------------------------|--------------------------------------------------------------------------------------------------------------------------------------------------------------------------------------------------------------|------------------------------------------------------------------------------------------------------------------------------------------------------------|----------------|
|           |                                |                                                                                                                                                                                                                                                            |                                                                                                                                                                                                              | Notes                                                                                                                                                      | References     |
|           |                                |                                                                                                                                                                                                                                                            | <b>339113</b> (2007-2016)                                                                                                                                                                                    |                                                                                                                                                            |                |
|           | Sputtering targets             | Sputtering targets used in semiconductors, magnetic storage media, and flat panel displays <i>(11)</i>                                                                                                                                                     | <b>334413</b> (2007-2016);<br><b>334613</b> (2007, 2012);<br><b>33461</b> (2008-2011, 2013-2016);<br><b>334419</b> (2007-2016)                                                                               |                                                                                                                                                            |                |
| Tellurium | Electronics                    | High purity tellurium in cadmium-telluride thin-film photovoltaic cells; bismuth telluride and antimony telluride in thermoelectric devices (Peltier effect) used as coolers; and infra-red detectors <i>(594)</i>                                         | <b>334413</b> (2010-2016);<br><b>334419</b> (2010-2016);<br><b>334511</b> (2010-2016)                                                                                                                        | Demand fractions are based on a global estimate provided in the reference. This estimate is used for all years of the analysis due to lack of better data. | <i>(117)</i>   |
|           | Metallurgy                     | Additive to various alloys to improve fatigue strength (lead alloys), improve machinability (copper alloys), machining characteristics (steel alloys), and as a carbide content stabilizer and to improve chill response (certain cast irons) <i>(594)</i> | <b>33111</b> (2010, 2011);<br><b>331110</b> (2012-2016);<br><b>33149</b> (2010,2011)<br><b>331491</b> (2012-2016);<br><b>331492</b> (2012-2016);<br><b>33151</b> (2010, 2011);<br><b>331511</b> (2012-2016); |                                                                                                                                                            |                |
|           | Rubber                         | Vulcanizing agent and accelerator for rubber production and catalyst for synthetic fiber production <i>(117)</i>                                                                                                                                           | <b>325212</b> (2010-2016);<br><b>325188</b> (2010, 2011);<br><b>325180</b> (2012-2016);<br><b>32522</b> (2010, 2011);<br><b>325220</b> (2012-2016)                                                           |                                                                                                                                                            |                |
|           | Other                          | Various uses including pigments for glass and ceramics <i>(117)</i>                                                                                                                                                                                        | <b>32513</b> (2010, 2011);<br><b>325130</b> (2012-2016)                                                                                                                                                      |                                                                                                                                                            |                |
| Tin mine  | Primary tin smelter production | The has not been any primary tin smelting in the United States since 1989                                                                                                                                                                                  | <b>Not applicable</b>                                                                                                                                                                                        | Not applicable                                                                                                                                             | Not applicable |

| Commodity   | Application category | Application description                                                                                                                                                                                                                                                                                 | Associated NAICS codes<br>(applicable years)                                                                                                                                                                                                                                                                                                                                                                                                                                                                                                                                                                                                                                                                                                                                                       | U.S. demand fraction                                                                                                                                                                                                                   |                    |
|-------------|----------------------|---------------------------------------------------------------------------------------------------------------------------------------------------------------------------------------------------------------------------------------------------------------------------------------------------------|----------------------------------------------------------------------------------------------------------------------------------------------------------------------------------------------------------------------------------------------------------------------------------------------------------------------------------------------------------------------------------------------------------------------------------------------------------------------------------------------------------------------------------------------------------------------------------------------------------------------------------------------------------------------------------------------------------------------------------------------------------------------------------------------------|----------------------------------------------------------------------------------------------------------------------------------------------------------------------------------------------------------------------------------------|--------------------|
|             |                      |                                                                                                                                                                                                                                                                                                         |                                                                                                                                                                                                                                                                                                                                                                                                                                                                                                                                                                                                                                                                                                                                                                                                    | Notes                                                                                                                                                                                                                                  | References         |
| Tin smelter | Alloys               | Various tin alloys, including copper-based alloys (e.g., bronze) used in plumbing and heating applications, machinery and engine bearings, fittings, castings, and stampings; tin-plated copper wire, high-impact alloys for aircraft landing gear; additive to cast iron for engine blocks, etc. (598) | <b>325910</b> (2007-2016);<br><b>331421</b> (2007);<br><b>331422</b> (2007);<br><b>331423</b> (2007);<br><b>33142</b> (2008-2011);<br><b>331420</b> (2012-2016);<br><b>331491</b> (2007, 2012-2016);<br><b>33149</b> (2008-2011);<br><b>331511</b> (2007-2016);<br><b>331522</b> (2007);<br><b>331523</b> (2012-2016);<br><b>331525</b> (2007);<br><b>331528</b> (2007);<br><b>331529</b> (2012-2016);<br><b>33152</b> (2008-2011);<br><b>332911</b> (2007, 2012-2016);<br><b>332912</b> (2007, 2012-2016);<br><b>332913</b> (2007, 2012-2016);<br><b>332919</b> (2007, 2012-2016);<br><b>33291</b> (2008-2011);<br><b>332999</b> (2007, 2012-2016);<br><b>33299</b> (2008-2011);<br><b>336312</b> (2007);<br><b>33631</b> (2008-2011);<br><b>336310</b> (2012-2016);<br><b>336413</b> (2007-2016) | Demand fractions are based U.S. consumption of tin by finished product form as reported by the references. Note that some data are withheld by the references to avoid disclosing priority company data but are used in this analysis. | (462-467, 599-601) |
|             | Chemicals            | Tin-based chemicals used in the production and curing of polyvinyl chloride, polyurethane, biocides (for anti-fouling paint; e.g., tributyltin), perfume and soap stabilizer, toothpaste additive, and catalysts (598)                                                                                  | <b>325211</b> (2007-2016);<br><b>325188</b> (2007-2011);<br><b>325180</b> (2012-2016);<br><b>325199</b> (2007, 2012-2016);<br><b>32519</b> (2008-2011);<br><b>325611</b> (2007, 2012-2016);<br><b>32561</b> (2008-2011);<br><b>325620</b> (2007-2016)                                                                                                                                                                                                                                                                                                                                                                                                                                                                                                                                              |                                                                                                                                                                                                                                        |                    |
|             | Tinplate             | Tinplate mainly used for cans and containers                                                                                                                                                                                                                                                            | <b>332431</b> (2007, 2012-2016);<br><b>332439</b> (2007, 2012-2016);<br><b>33243</b> (2008-2011)                                                                                                                                                                                                                                                                                                                                                                                                                                                                                                                                                                                                                                                                                                   |                                                                                                                                                                                                                                        |                    |
|             | Solders              | Tin solder mainly used in electronic devices for making connections on circuit boards. Tin solder is also used in automotive applications (e.g., radiators, air conditioners, and automotive electronic components) (598)                                                                               | <b>325998</b> (2007, 2012-2016);<br><b>32599</b> (2008-2011);<br><b>334417</b> (2007-2016);<br><b>335931</b> (2007, 2012-2016);<br><b>33593</b> (2008-2011);<br><b>336391</b> (2007-2011);<br><b>336399</b> (2007-2011);<br><b>336390</b> (2012-2016);<br><b>336322</b> (2007);                                                                                                                                                                                                                                                                                                                                                                                                                                                                                                                    |                                                                                                                                                                                                                                        |                    |

| Commodity                    | Application category                     | Application description                                                                                                                                                                                                                                                                                                                                                                                       | Associated NAICS codes<br>(applicable years)                                                                                                                                                                                                                                                                                                                                                                                                                                                                                                                                                                                          | U.S. demand fraction                                                                                                                    |                         |
|------------------------------|------------------------------------------|---------------------------------------------------------------------------------------------------------------------------------------------------------------------------------------------------------------------------------------------------------------------------------------------------------------------------------------------------------------------------------------------------------------|---------------------------------------------------------------------------------------------------------------------------------------------------------------------------------------------------------------------------------------------------------------------------------------------------------------------------------------------------------------------------------------------------------------------------------------------------------------------------------------------------------------------------------------------------------------------------------------------------------------------------------------|-----------------------------------------------------------------------------------------------------------------------------------------|-------------------------|
|                              |                                          |                                                                                                                                                                                                                                                                                                                                                                                                               |                                                                                                                                                                                                                                                                                                                                                                                                                                                                                                                                                                                                                                       | Notes                                                                                                                                   | References              |
|                              |                                          |                                                                                                                                                                                                                                                                                                                                                                                                               | <b>33632</b> (2008-2011);<br><b>336320</b> (2012-2016)                                                                                                                                                                                                                                                                                                                                                                                                                                                                                                                                                                                |                                                                                                                                         |                         |
|                              | Other                                    | Various uses including float glass industry (Pilkington process), tin tetrachloride to improve abrasive resistance to glass bottles, jewelry, lead-acid batteries, dental amalgam, ammunition, etc. (598)                                                                                                                                                                                                     | <b>327211</b> (2007-2016);<br><b>327213</b> (2007-2016);<br><b>335911</b> (2007-2016);<br><b>332992</b> (2007-2016);<br><b>339114</b> (2007-2016);<br><b>339116</b> (2007-2016);<br><b>339911</b> (2007);<br><b>339912</b> (2007);<br><b>339913</b> (2007);<br><b>339914</b> (2007);<br><b>33991</b> (2008-2011);<br><b>339910</b> (2012-2016)                                                                                                                                                                                                                                                                                        |                                                                                                                                         |                         |
| Titanium metal               | Aerospace                                | Titanium metal and alloys used for its strength-to-weight ratio and corrosion resistance in variety of aerospace applications (e.g., airframes, aircraft engines, satellites, helicopters, missiles, etc.)                                                                                                                                                                                                    | <b>336411</b> (2007, 2012);<br><b>336412</b> (2007, 2012);<br><b>336413</b> (2007, 2012);<br><b>336414</b> (2007, 2012);<br><b>336415</b> (2007, 2012);<br><b>336419</b> (2007, 2012);<br><b>33641</b> (2008-2011, 2013-2016)                                                                                                                                                                                                                                                                                                                                                                                                         | Demand fractions are based on estimated consumption of titanium metal by application in the United States as reported by the references | (118-123, 198-200, 573) |
|                              | Other                                    | Other titanium metal applications include armor, automotive exhaust systems, chemical processing (e.g., chlor-alkali), food processing equipment, heat transfer equipment, oil and gas industry (mainly offshore), pulp and paper industry, marine hardware, medical implants and dental alloys, nuclear fuel and waste containers, power generation, sporting goods, and other miscellaneous uses (117, 469) | <b>325181</b> (2007-2011);<br><b>325180</b> (2012-2016);<br><b>332410</b> (2007-2016);<br><b>332420</b> (2007-2016);<br><b>333132</b> (2007, 2012-2016);<br><b>33313</b> (2008-2011);<br><b>333611</b> (2007-2016);<br><b>333291</b> (2007);<br><b>333294</b> (2007);<br><b>33329</b> (2008-2011);<br><b>333241</b> (2012-2016);<br><b>333243</b> (2012-2016);<br><b>336312</b> (2007);<br><b>33631</b> (2008-2011);<br><b>336310</b> (2012-2016);<br><b>336992</b> (2007-2016);<br><b>339920</b> (2007-2016);<br><b>339112</b> (2007-2016);<br><b>339113</b> (2007-2016);<br><b>339114</b> (2007-2016);<br><b>339116</b> (2007-2016) |                                                                                                                                         |                         |
| Titanium mineral concentrate | Pigments for paint, varnish, and lacquer |                                                                                                                                                                                                                                                                                                                                                                                                               | <b>325131</b> (2007);<br><b>32513</b> (2008-2011);<br><b>325130</b> (2012-2016);                                                                                                                                                                                                                                                                                                                                                                                                                                                                                                                                                      | Demand fractions are based on U.S. consumption of                                                                                       | (468-473, 602-604)      |

| Commodity | Application category                                                                                                                                        | Application description                                                                                                                                                                                                                                                                                                                                                        | Associated NAICS codes<br>(applicable years)                                                                                                                                                                                                                                  | U.S. demand fraction                                                                                                            |            |
|-----------|-------------------------------------------------------------------------------------------------------------------------------------------------------------|--------------------------------------------------------------------------------------------------------------------------------------------------------------------------------------------------------------------------------------------------------------------------------------------------------------------------------------------------------------------------------|-------------------------------------------------------------------------------------------------------------------------------------------------------------------------------------------------------------------------------------------------------------------------------|---------------------------------------------------------------------------------------------------------------------------------|------------|
|           |                                                                                                                                                             |                                                                                                                                                                                                                                                                                                                                                                                |                                                                                                                                                                                                                                                                               | Notes                                                                                                                           | References |
|           |                                                                                                                                                             |                                                                                                                                                                                                                                                                                                                                                                                | <b>325510</b> (2007-2016);<br><b>332812</b> (2007, 2012-2016);<br><b>33281</b> (2008-2011);<br><b>339942</b> (2007);<br><b>33994</b> (2008-2011);<br><b>339940</b> (2012-2016);                                                                                               | titanium concentrate for pigments and miscellaneous uses and then by the distribution of titanium pigment shipments by industry |            |
|           | Pigments for paper                                                                                                                                          | <b>322121</b> (2007, 2012-2016);<br><b>32212</b> (2008-2011);<br><b>322130</b> (2007-2016)                                                                                                                                                                                                                                                                                     |                                                                                                                                                                                                                                                                               |                                                                                                                                 |            |
|           | Pigments for plastic and rubber                                                                                                                             | <b>325211</b> (2007-2016);<br><b>325212</b> (2007-2016)                                                                                                                                                                                                                                                                                                                        |                                                                                                                                                                                                                                                                               |                                                                                                                                 |            |
|           | Pigments for other uses (e.g., agricultural, building materials, catalysts, ceramics, coated fabrics and textiles, floor coverings, food, and printing ink) | <b>311340</b> (2007-2016);<br><b>313320</b> (2007-2016);<br><b>325188</b> (2007-2011);<br><b>325180</b> (2012-2016);<br><b>325910</b> (2007-2016);<br><b>327111</b> (2007-2011);<br><b>327110</b> (2012-2016);<br><b>327122</b> (2007-2011);<br><b>327120</b> (2012-2016)                                                                                                      |                                                                                                                                                                                                                                                                               |                                                                                                                                 |            |
|           | Other uses including welding-rod coatings and fluxes, carbides, chemicals, glass fiber, and titanium metal and alloys                                       | <b>331</b> (2007);<br><b>33141</b> (2008-2011);<br><b>331410</b> (2012-2016);<br><b>33149</b> (2008-2011);<br><b>331491</b> (2012-2016);<br><b>325998</b> (2007, 2012-2016);<br><b>32599</b> (2008-2011);<br><b>333992</b> (2007, 2012-2016);<br><b>33399</b> (2008-2011);<br><b>332111</b> (2007, 2012-2016);<br><b>332112</b> (2007, 2012-2016);<br><b>33211</b> (2008-2011) |                                                                                                                                                                                                                                                                               |                                                                                                                                 |            |
| Tungsten  | Cemented carbides                                                                                                                                           | Cemented carbides used in cutting and drilling tools used by the mining, construction, automotive, and aerospace sectors                                                                                                                                                                                                                                                       | <b>333131</b> (2007, 2012-2016);<br><b>333132</b> (2007, 2012-2016);<br><b>33313</b> (2008-2011);<br><b>333511</b> (2007-2016);<br><b>333514</b> (2007-2016);<br><b>333515</b> (2007-2016);<br><b>332213</b> (2007);<br><b>33221</b> (2008-2011);<br><b>332216</b> (2012-216) | Demand fractions are based on tungsten consumptions by first-use as reported by the references. Data for years 20               | (480)      |
|           | Steel and alloys                                                                                                                                            | Tungsten used in various steels (mainly tool steels), as well as nickel-based superalloys and other alloys                                                                                                                                                                                                                                                                     | <b>331111</b> (2007);<br><b>331112</b> (2007);<br><b>33111</b> (2008-2011);<br><b>331110</b> (2012-2016);                                                                                                                                                                     |                                                                                                                                 |            |

| Commodity | Application category | Application description                                                                                                                                                                                                                                                                                                                                                          | Associated NAICS codes<br>(applicable years)                                                                                                                                                                                                                                                                                                                                           | U.S. demand fraction                                                                                                                                                                                                                                                                            |                          |
|-----------|----------------------|----------------------------------------------------------------------------------------------------------------------------------------------------------------------------------------------------------------------------------------------------------------------------------------------------------------------------------------------------------------------------------|----------------------------------------------------------------------------------------------------------------------------------------------------------------------------------------------------------------------------------------------------------------------------------------------------------------------------------------------------------------------------------------|-------------------------------------------------------------------------------------------------------------------------------------------------------------------------------------------------------------------------------------------------------------------------------------------------|--------------------------|
|           |                      |                                                                                                                                                                                                                                                                                                                                                                                  |                                                                                                                                                                                                                                                                                                                                                                                        | Notes                                                                                                                                                                                                                                                                                           | References               |
|           |                      |                                                                                                                                                                                                                                                                                                                                                                                  | <b>331491</b> (2007, 2012-2016);<br><b>331492</b> (2007, 2012-2016);<br><b>33149</b> (2008-2011);<br><b>331221</b> (2007, 2012-2016);<br><b>331222</b> (2007, 2012-2016);<br><b>33122</b> (2008-2011)                                                                                                                                                                                  |                                                                                                                                                                                                                                                                                                 |                          |
|           | Mill products        | Tungsten mill products produced via powder metallurgy for use mainly in lamps (e.g., incandescent lamps) and various other applications including electrical and electronic applications (mainly as electrical contacts) (480)                                                                                                                                                   | <b>335110</b> (2007-2016);<br><b>335931</b> (2007, 2012-2016);<br><b>33593</b> (2008-2011)                                                                                                                                                                                                                                                                                             |                                                                                                                                                                                                                                                                                                 |                          |
|           | Chemical and other   | Tungsten used as catalysts, dyes and pigments, tungsten hexafluoride gas in the production of semiconductor circuits and circuit boards, and various other uses                                                                                                                                                                                                                  | <b>325188</b> (2007-2011);<br><b>325180</b> (2012-2016);<br><b>325131</b> (2007);<br><b>32513</b> (2008-2011);<br><b>325130</b> (2012-2016);<br><b>334413</b> (2007-2016);                                                                                                                                                                                                             |                                                                                                                                                                                                                                                                                                 |                          |
| Vanadium  | Aluminum alloys      | Vanadium-aluminum master alloys used to provide titanium-alloys the required strength for use in the aerospace industry                                                                                                                                                                                                                                                          | <b>331312</b> (2007-2011);<br><b>331313</b> (2012-2016);<br><b>331314</b> (2007-2016)                                                                                                                                                                                                                                                                                                  | Demand fractions are based on reported demand for the United States by the reference. Note that some data are withheld by the references to avoid disclosing priority company data but are used in this analysis. Also note that reported consumption is notably less than apparent consumption | (482-487, 541, 605, 606) |
|           | Cast iron            | Addition of vanadium to cast iron to improve its wear resistance and mechanical properties                                                                                                                                                                                                                                                                                       | <b>331511</b> (2007, 2012-2016);<br><b>33151</b> (2008-2011)                                                                                                                                                                                                                                                                                                                           |                                                                                                                                                                                                                                                                                                 |                          |
|           | Steel alloys         | Alloying agent in various steels to provide additional strength, toughness, malleability and weldability. These steels are used in numerous applications including but not limited to line pipes, structural applications (e.g., high-rise buildings), transportation applications (e.g., automobiles, aerospace, and rail), machinery and equipment, containers, to name a few. | <b>331112</b> (2007);<br><b>33111</b> (2008-2011);<br><b>331110</b> (2012-2016);<br><b>331210</b> (2007-2016);<br><b>331221</b> (2007, 2012-2016); <b>33122</b> (2008-2011)                                                                                                                                                                                                            |                                                                                                                                                                                                                                                                                                 |                          |
|           | Other alloys         | Other vanadium alloys including magnetic alloys, welding alloys, and superalloys. Vanadium-bearing superalloys (e.g., IN-100, H53, C-276) are used in a number of applications including aerospace engines and marine gas turbine engines (488)                                                                                                                                  | <b>331491</b> (2007, 2012-2016);<br><b>331492</b> (2007, 2012-2016);<br><b>33149</b> (2008-2011)                                                                                                                                                                                                                                                                                       |                                                                                                                                                                                                                                                                                                 |                          |
|           | Other                | Other applications include catalysts (for the production of various chemicals including maleic anhydride, phthalic anhydride, synthetic rubber, and sulfuric acid, as well as the scrubbing of fluid catalytic cracking flue gases), dyes and pigments, medicines and pharmaceuticals, and other chemical applications (488)                                                     | <b>324110</b> (2007-2011);<br><b>325188</b> (2007-2011);<br><b>325180</b> (2012-2016);<br><b>325192</b> (2007);<br><b>32519</b> (2008-2011);<br><b>325194</b> (2012-2016);<br><b>325211</b> (2007-2016);<br><b>325212</b> (2007-2016);<br><b>325131</b> (2007);<br><b>32513</b> (2008-2011);<br><b>325130</b> (2012-2016);<br><b>325411</b> (2007-2016);<br><b>325412</b> (2007-2016); |                                                                                                                                                                                                                                                                                                 |                          |
| Yttrium   | Advanced ceramics    | Additive to zirconia crystal to form yttria-stabilized zirconia, as well as an additive silicon aluminum oxynitrides, silicon nitride, and aluminum                                                                                                                                                                                                                              | <b>327910</b> (2007-2016);<br><b>327123</b> (2007-2011);                                                                                                                                                                                                                                                                                                                               | See section on rare earth demand and                                                                                                                                                                                                                                                            | (565)                    |



| Commodity    | Application category   | Application description                                                                                                                                                                                                                                          | Associated NAICS codes (applicable years)                                                                                                                                                                                                                                                                                                         | U.S. demand fraction                                                                                                                      |                |
|--------------|------------------------|------------------------------------------------------------------------------------------------------------------------------------------------------------------------------------------------------------------------------------------------------------------|---------------------------------------------------------------------------------------------------------------------------------------------------------------------------------------------------------------------------------------------------------------------------------------------------------------------------------------------------|-------------------------------------------------------------------------------------------------------------------------------------------|----------------|
|              |                        |                                                                                                                                                                                                                                                                  |                                                                                                                                                                                                                                                                                                                                                   | Notes                                                                                                                                     | References     |
|              |                        | nitride, which are used in various applications including structural ceramics, ceramic cutting tools, fiber optic connectors, oxygen sensors, thermal barrier coating for aircraft and power generation turbines, bio-ceramics, and solid oxide fuel cells (565) | 327120 (2012-2016);<br>336412 (2007-2016);<br>333611 (2007-2016);<br>333618 (2007-2016);<br>335921 (2007, 2012-2016);<br>33592 (2008-2011);<br>333515 (2007-2016);<br>334519 (2007-2016);<br>327113 (2007-2011);<br>327110 (2012-2016);<br>339113 (2007-2016);<br>334413 (2007-2016)                                                              | net imports in this document for details                                                                                                  |                |
|              | Glass                  | Dopant in glass for specialty applications (565)                                                                                                                                                                                                                 | 335921 (2007, 2012-2016);<br>33592 (2008-2011)                                                                                                                                                                                                                                                                                                    |                                                                                                                                           |                |
|              | Phosphors and pigments | Yttrium-hosted phosphors for lighting (fluorescent and light-emitting diode lamps), displays (cathode ray tubes, plasma display panels, and field-emission display), x-rays, and other phosphors; as well as small amounts for color-staining pigments (565)     | 325131 (2007);<br>32513 (2008-2011);<br>325130 (2012-2016);<br>335110 (2007-2016);<br>334220 (2007-2016);<br>334111 (2007-2009, 2012-2016);<br>334119 (2007-2009);<br>33411 (2010, 2011);<br>334118 (2012-2016);<br>334210 (2007, 2009-2016);<br>3342 (2008);<br>336321 (2007);<br>3362 (2008-2011);<br>336320 (2012-2016);<br>334517 (2007-2016) |                                                                                                                                           |                |
|              | Other                  | Solid state laser crystals including neodymium-doped yttrium-aluminum-garnet (YAG) crystal. Yttrium is also used in magnesium alloys, but demand data are not available. (565)                                                                                   | 334511 (2007-2016)                                                                                                                                                                                                                                                                                                                                |                                                                                                                                           |                |
| Zinc mine    | Zinc smelting          | Smelting of zinc concentrates                                                                                                                                                                                                                                    | 331 (2007);<br>33141 (2008-2011);<br>331410 (2012-2016)                                                                                                                                                                                                                                                                                           | In this analysis it is assumed that all zinc concentrates are provided to primary smelters                                                | Not applicable |
| Zinc smelter | Galvanizing            | Galvanizing of steel (either directly by steel mills or steel fabricators) for protection from corrosion. Galvanized steel is used extensively in the automotive and construction industries. (489, 607)                                                         | 331111 (2007);<br>33111 (2008-2011);<br>331110 (20012-2016);<br>331112 (2007);<br>331210 (2007-2016);<br>331221 (2007, 2012-2016);<br>331222 (2007, 2012-2016);<br>33122 (2008-2011);                                                                                                                                                             | Demand fractions are estimated based on the remainder of apparent consumption after subtracting the quantities for the other applications | Not applicable |

| Commodity | Application category   | Application description                                                                                                                                                                                                                                                                                                                                                                                                                                                                                                                                                                                                                                                                                                                                          | Associated NAICS codes (applicable years)                                                                                                                                                                                                                                                                                                                                                                           | U.S. demand fraction                                                                                                                                                                                                                              |            |
|-----------|------------------------|------------------------------------------------------------------------------------------------------------------------------------------------------------------------------------------------------------------------------------------------------------------------------------------------------------------------------------------------------------------------------------------------------------------------------------------------------------------------------------------------------------------------------------------------------------------------------------------------------------------------------------------------------------------------------------------------------------------------------------------------------------------|---------------------------------------------------------------------------------------------------------------------------------------------------------------------------------------------------------------------------------------------------------------------------------------------------------------------------------------------------------------------------------------------------------------------|---------------------------------------------------------------------------------------------------------------------------------------------------------------------------------------------------------------------------------------------------|------------|
|           |                        |                                                                                                                                                                                                                                                                                                                                                                                                                                                                                                                                                                                                                                                                                                                                                                  |                                                                                                                                                                                                                                                                                                                                                                                                                     | Notes                                                                                                                                                                                                                                             | References |
|           |                        |                                                                                                                                                                                                                                                                                                                                                                                                                                                                                                                                                                                                                                                                                                                                                                  | <b>332812</b> (2007, 2012-2016); <b>33281</b> (2008-2011)                                                                                                                                                                                                                                                                                                                                                           | noted below                                                                                                                                                                                                                                       |            |
|           | Zinc-base alloys       | Zinc-base alloys mainly used in die-cast parts for various applications including automotive parts, as well as hardware, home appliances, medical instruments, office equipment, power tools. (489)                                                                                                                                                                                                                                                                                                                                                                                                                                                                                                                                                              | <b>331491</b> (2007, 2012-2016); <b>331522</b> (2007); <b>33152</b> (2008-2011); <b>331523</b> (2012-2016); <b>332510</b> (2007-2016)                                                                                                                                                                                                                                                                               | Demand fractions estimated are based on net imports of casting grade zinc relative to apparent consumption after adjustments for net import reliance                                                                                              | (75)       |
|           | Brass and bronze       | Brasses and bronzes that are fabricated into wires, rods, bars, and tubes for various applications. (607)                                                                                                                                                                                                                                                                                                                                                                                                                                                                                                                                                                                                                                                        | <b>331421</b> (2007); <b>331422</b> (2007); <b>33142</b> (2008-2011); <b>331420</b> (2012-2016)                                                                                                                                                                                                                                                                                                                     | Demand fractions are based on reported consumption of zinc by copper industry                                                                                                                                                                     | (568)      |
|           | Other                  | Other applications include various zinc chemicals, zinc semi-manufactures, and miscellaneous uses.<br><br>Zinc chemicals include zinc oxides, zinc carbonate, zinc sulfate, zinc sulfide, zinc chloride, zinc borate, zinc selenite, and nanoform zinc compounds. These zinc compounds are used in agriculture and animal husbandry, food and pharmaceutical industries, plastics, paper, and textile industries, ceramics and glass industries, electronics industry (varistors), rubber vulcanization for tires, and in pigments.<br><br>Zinc semi-manufacturers are fabricated zinc products mainly as rolled zinc, which is used in architectural applications and coinage, as well as wire and rod used in galvanic anode in zinc batteries (489, 607, 608) | <b>325131</b> (2007); <b>325132</b> (2007); <b>32513</b> (2008-2011); <b>325130</b> (2012-2016); <b>325510</b> (2007-2016); <b>325181</b> (2007-2011); <b>325180</b> (2012-2016); <b>325412</b> (2007-2016); <b>325212</b> (2007-2016); <b>332999</b> (2007, 2012-2016) <b>33299N</b> (2008-2011); <b>335911</b> (2007-2016); <b>335912</b> (2007-2016); <b>331524</b> (2007, 2012-2016); <b>331529</b> (2012-2016) | Demand fractions are estimated based on net imports of zinc oxides, zinc sulfates, zinc sulfides, zinc chlorides, zinc yellow, zinc dusts, and zinc powders and flakes relative to apparent consumption after adjustments for net import reliance | (75)       |
| Zirconium | Ceramics (traditional) | Zircon and zirconium silicates as opacifiers in traditional ceramics (i.e., whiteware for sanitaryware, tableware, electrical porcelain, enamel, etc.) and ceramic glazes (609)                                                                                                                                                                                                                                                                                                                                                                                                                                                                                                                                                                                  | <b>327111</b> (2007); <b>327112</b> (2007); <b>327113</b> (2007); <b>32711</b> (2008-2011); <b>327110</b> (2012-2016)                                                                                                                                                                                                                                                                                               | Demand fractions are based on estimates and forecasts for zircon consumption by category for North America as reported by the reference                                                                                                           | (609)      |
|           | Chemicals              | Zirconium chemicals and high-purity zirconia for pigments, paints, inks, metal coatings, antiperspirants, leather tanning, textiles, oil and gas industry, catalysts (as stabilizer in three-way automotive catalytic converters), and cubic zirconia for jewelry and decorative glass (609)                                                                                                                                                                                                                                                                                                                                                                                                                                                                     | <b>313312</b> (2007); <b>31331</b> (2008-2011); <b>313310</b> (2012-2016); <b>316110</b> (2007-2016); <b>325181</b> (2007-2011); <b>325180</b> (2012-2016); <b>325131</b> (2007);                                                                                                                                                                                                                                   |                                                                                                                                                                                                                                                   |            |

| Commodity | Application category | Application description                                                                                                                                                                                                                                                  | Associated NAICS codes<br>(applicable years)                                                                                                                                                                                                                                                                                                                                                                        | U.S. demand fraction |            |
|-----------|----------------------|--------------------------------------------------------------------------------------------------------------------------------------------------------------------------------------------------------------------------------------------------------------------------|---------------------------------------------------------------------------------------------------------------------------------------------------------------------------------------------------------------------------------------------------------------------------------------------------------------------------------------------------------------------------------------------------------------------|----------------------|------------|
|           |                      |                                                                                                                                                                                                                                                                          |                                                                                                                                                                                                                                                                                                                                                                                                                     | Notes                | References |
|           |                      |                                                                                                                                                                                                                                                                          | <b>32513</b> (2008-2011);<br><b>325130</b> (2012-2016);<br><b>325510</b> (2007-2016);<br><b>325910</b> (2007-2016);<br><b>325620</b> (2007-2016);<br><b>332812</b> (2007, 2012-2016);<br><b>33281</b> (2008-2011);<br><b>336399</b> (2007-2011);<br><b>336390</b> (2012-2016);<br><b>339911</b> (2007);<br><b>339913</b> (2007);<br><b>339914</b> (2007);<br><b>33991</b> (2008-2011);<br><b>339910</b> (2012-2016) |                      |            |
|           | Foundry sands        | Zircon foundry sands used in metal casting                                                                                                                                                                                                                               | <b>333511</b> (2007-2016);<br><b>331511</b> (2007, 2012-2016);<br><b>331512</b> (2007, 2012-2016);<br><b>331513</b> (2007, 2012-2016);<br><b>33151</b> (2008-2011);<br><b>331521</b> (2007);<br><b>331522</b> (2007);<br><b>331523</b> (2012-2016);<br><b>331524</b> (2007, 2012-2016);<br><b>331525</b> (2007);<br><b>331528</b> (2007);<br><b>331529</b> (2012-2016);<br><b>33152</b> (2008-2011)                 |                      |            |
|           | Refractories         | Zircon-based refractories used as linings for furnaces, kilns, incinerators, reactors and crucibles mainly in the production of iron and steel, cement, and glass (609)                                                                                                  | <b>331111</b> (2007);<br><b>331112</b> (2007);<br><b>33111</b> (2008-2011);<br><b>331110</b> (2012-2016);<br><b>327125</b> (2007);<br><b>32712</b> (2008-2011);<br><b>327120</b> (2012-2016);<br><b>333298</b> (2007);<br><b>33329N</b> (2008-2011);<br><b>333249</b> (2012-2016)                                                                                                                                   |                      |            |
|           | Other                | Variety of uses including abrasives, cathode ray tube (CRT) glass for televisions and computer monitors, other specialty glass, zirconium sponge and alloys in nuclear energy, industrial process plants, and photographic flash bulbs, and solid oxide fuel cells (609) | <b>327211</b> (2007-2016);<br><b>327212</b> (2007-2016);<br><b>327910</b> (2007-2016);<br><b>332410</b> (2007-2016);<br><b>334413</b> (2007-2016);<br><b>335110</b> (2007-2016);                                                                                                                                                                                                                                    |                      |            |

## Rare earth elements

### Rare earth oxide production estimation

The following method was utilized to estimate global rare earth oxide (REO) production by element for each producing country. Total REO production data were obtained from the U.S. Geological Survey's Minerals Yearbooks (610–615). Because Chinese production quantities reported in the U.S. Geological Survey's Minerals Yearbooks represent only official production quotas, the quantity of illegal production had to be incorporated. However, because it is believed that some of the legal production in China came from illegal production, summing both quantities would result in a certain amount of double-counting. Estimates for both legal and illegal production were thus obtained from Roskill (566), which accounted for these issues.

Because the distribution of individual rare earth elements varies considerably by location, it was necessary to disaggregate Chinese production by province. The quantities for China's legal production were disaggregated by province based on province-level export quotas (565, 616, 617). For illegal production, Roskill (566) provides estimates by region (Northern region: Inner Mongolia and Shandong provinces; Central region: Sichuan province; and Southern region: Yunnan, Guangxi, Guangdong, Jiangxi, and Fujian provinces). Illegal production estimates for Inner Mongolia and Shandong provinces in the Northern region were disaggregated among these two provinces based on their legal production quota (565, 616, 617). For the Southern region, Roskill notes that illegal production is predominately in the remote regions of western Yunnan and Guangxi provinces, although Guangdong, Jiangxi, and Fujian provinces also have significant illegal production (566). Due to lack of better information, the Southern region's estimated illegal production was thus allocated as follows: 33.3% Yunnan, 33.3% Guangxi, and the remaining 33.3% distributed proportionally among Guangdong, Jiangxi, and Fujian based on their legal production quotas.

The total REO production by country (and by province for China) were then allocated to individual rare earth element oxides using the distributions for each country noted in table S5 and for Chinese province noted in table S6.

For Malaysia, the proportion that was produced by monazite and xenotime were obtained from the British Geological Survey (173). For the Chinese province of Jiangxi, the average of the four distributions noted in table S5 is utilized in this analysis. No representative REO distribution was found for Yunnan province. The distribution for Xinfeng in Jiangxi province, which is noted as having a similar "rich europium and middle yttrium" distribution (618), was utilized instead.

**Table S5. Rare earth oxide distribution (in percent of total) for various world regions.**

| REO                            | Australia<br>Mt. Weld,<br>Central<br>Lanthanide<br>Deposit<br>(monazite) | Brazil<br>Eastern<br>coast<br>(monazite) | India<br>Manavalakurichi,<br>Tamil Nadu<br>(monazite) | Malaysia<br>Perak<br>(monazite) | Malaysia<br>Perak<br>(xenotime) | Russia<br>Lovozero<br>complex<br>(loparite) | Thailand<br>(monazite) <sup>a</sup> | United<br>States<br>Mountain<br>Pass,<br>California<br>(bastnäsite) <sup>b</sup> | Vietnam |
|--------------------------------|--------------------------------------------------------------------------|------------------------------------------|-------------------------------------------------------|---------------------------------|---------------------------------|---------------------------------------------|-------------------------------------|----------------------------------------------------------------------------------|---------|
| Y <sub>2</sub> O <sub>3</sub>  | 0.76                                                                     | 1.40                                     | 0.45                                                  | 2                               | 61                              | 1.25                                        | -                                   | 0.12                                                                             | 0.55    |
| La <sub>2</sub> O <sub>3</sub> | 23.88                                                                    | 24.00                                    | 22                                                    | 23                              | 1.24                            | 25                                          | 22.4                                | 34.0                                                                             | 33.7    |
| CeO <sub>2</sub>               | 47.55                                                                    | 47.00                                    | 46                                                    | 46.2                            | 3.13                            | 50.5                                        | 45.5                                | 48.8                                                                             | 48.7    |
| Pr <sub>2</sub> O <sub>3</sub> | 5.16                                                                     | 4.50                                     | 5.5                                                   | 4.6                             | 0.493                           | 5                                           | 5.1                                 | 4.2                                                                              | 3.59    |
| Nd <sub>2</sub> O <sub>3</sub> | 18.13                                                                    | 18.50                                    | 20                                                    | 19.7                            | 1.59                            | 15                                          | 17.6                                | 11.7                                                                             | 11.3    |
| Sm <sub>2</sub> O <sub>3</sub> | 2.44                                                                     | 3.00                                     | 2.5                                                   | 3.2                             | 1.14                            | 0.65                                        | 2.3                                 | 0.79                                                                             | 1.07    |
| Eu <sub>2</sub> O <sub>3</sub> | 0.53                                                                     | 0.1                                      | 0.015                                                 | 0.1                             | 0.12                            | 0.09                                        | --                                  | 0.13                                                                             | 0.24    |
| Gd <sub>2</sub> O <sub>3</sub> | 1.09                                                                     | 1.00                                     | 1.2                                                   | 0.8                             | 3.47                            | 0.55                                        | 1.2                                 | 0.21                                                                             | 0.54    |
| Tb <sub>4</sub> O <sub>7</sub> | 0.09                                                                     | 0.1                                      | 0.06                                                  | --                              | 0.906                           | --                                          | --                                  | 0.014                                                                            | 0.06    |
| Dy <sub>2</sub> O <sub>3</sub> | 0.25                                                                     | 0.4                                      | 0.18                                                  | --                              | 8.32                            | 0.55                                        | 2.2                                 | 0.027                                                                            | 0.12    |
| Ho <sub>2</sub> O <sub>3</sub> | 0.03                                                                     | trace                                    | 0.02                                                  | --                              | 1.98                            | 0.7                                         | --                                  | 0.004                                                                            | 0.02    |
| Er <sub>2</sub> O <sub>3</sub> | 0.06                                                                     | 0.1                                      | 0.01                                                  | --                              | 6.43                            | 0.8                                         | --                                  | 0.003                                                                            | 0.09    |
| Tm <sub>2</sub> O <sub>3</sub> | 0.01                                                                     | trace                                    | --                                                    | --                              | 1.12                            | 0.1                                         | --                                  | 0.001                                                                            | --      |
| Yb <sub>2</sub> O <sub>3</sub> | 0.03                                                                     | 0.02                                     | --                                                    | --                              | 6.77                            | 0.2                                         | --                                  | 0.001                                                                            | 0.02    |
| Lu <sub>2</sub> O <sub>3</sub> | --                                                                       | Not                                      | --                                                    | --                              | 0.988                           | 0.15                                        | --                                  | 0.0001                                                                           | --      |
| References                     | (619)                                                                    | (620)                                    | (621)                                                 | (622) cited<br>in (623)         | (624)                           | (625)<br>cited in<br>(626)                  | (627)                               | (628)                                                                            | (629)   |

**Table S6. Rare earth oxide distribution (in percent of total) for various regions in China.**

| REO                            | Southern China (ion-adsorption type) deposits |                     |                      |                                  |                   |                     |                      |                                     |                    |                                  |         |
|--------------------------------|-----------------------------------------------|---------------------|----------------------|----------------------------------|-------------------|---------------------|----------------------|-------------------------------------|--------------------|----------------------------------|---------|
|                                | Bayan<br>Obo, Inner<br>Mongolia <sup>c</sup>  | Mianning<br>Sichuan | Weishan,<br>Shandong | Longnan,<br>Jiangxi <sup>d</sup> | Xunwu,<br>Jiangxi | Xinfeng,<br>Jiangxi | Shanghang,<br>Fujian | Pingyuan,<br>Guangdong <sup>e</sup> | Jianghua,<br>Hunan | Dingnan,<br>Jiangxi <sup>f</sup> | Guangxi |
| Y <sub>2</sub> O <sub>3</sub>  | 0.5                                           | 0.91                | 0.76                 | 64.9                             | 10.07             | 24.26               | 25.64                | 10.3                                | 47.4               | 11.7                             | 29      |
| La <sub>2</sub> O <sub>3</sub> | 23                                            | 31.49               | 35.46                | 2.18                             | 38                | 27.56               | 27.32                | 27.2                                | 16.03              | 16.8                             | 24.07   |
| CeO <sub>2</sub>               | 50                                            | 47.69               | 47.76                | <1.09                            | 3.5               | 3.23                | 2.02                 | 4.9                                 | 0.32               | 42.3                             | 0.6     |
| Pr <sub>2</sub> O <sub>3</sub> | 6.2                                           | 4.11                | 3.95                 | 1.08                             | 7.41              | 5.62                | 5.78                 | 7                                   | 4.4                | 3.7                              | 5.56    |
| Nd <sub>2</sub> O <sub>3</sub> | 18.5                                          | 12.96               | 10.9                 | 3.47                             | 30.18             | 17.55               | 19.82                | 29.5                                | 10.35              | 14.3                             | 19.81   |
| Sm <sub>2</sub> O <sub>3</sub> | 0.8                                           | 1.47                | 0.79                 | 2.34                             | 5.32              | 4.54                | 4.19                 | 5.4                                 | 2.43               | 2.9                              | 4.38    |
| Eu <sub>2</sub> O <sub>3</sub> | 0.2                                           | 0.26                | 0.13                 | <0.37                            | 0.51              | 0.93                | 0.87                 | 0.58                                | 0.1                | 0.5                              | 0.72    |
| Gd <sub>2</sub> O <sub>3</sub> | 0.7                                           | 0.66                | 0.53                 | 5.69                             | 4.21              | 5.96                | 4.23                 | 3.9                                 | 3.96               | 2.5                              | 4.35    |
| Tb <sub>4</sub> O <sub>7</sub> | 0.1                                           | 0.08                | 0.14                 | 1.13                             | 0.46              | 0.68                | 0.74                 | 0.7                                 | 0.97               | 0.4                              | 0.62    |
| Dy <sub>2</sub> O <sub>3</sub> | 0.1                                           | 0.22                |                      | 7.48                             | 1.77              | 3.71                | 3.77                 | 2.6                                 | 6.24               | 2.1                              | 4.06    |
| Ho <sub>2</sub> O <sub>3</sub> | --                                            | 0.04                |                      | 1.6                              | 0.27              | 0.74                | 0.42                 | 0.52                                | 1.2                | 0.4                              | 0.77    |
| Er <sub>2</sub> O <sub>3</sub> | --                                            | 0.06                |                      | 4.26                             | 0.88              | 2.48                | 2.32                 | 0.91                                | 3.52               | 1.1                              | 2.59    |
| Tm <sub>2</sub> O <sub>3</sub> | --                                            | 0.02                |                      | 0.6                              | 0.13              | 0.27                | 0.39                 | 0.14                                | 0.56               | 0.2                              | 0.39    |
| Yb <sub>2</sub> O <sub>3</sub> | --                                            | 0.05                | 0.03                 | 3.34                             | 0.62              | 1.13                | 1                    | 0.71                                | 2.38               | 1                                | 2.66    |
| Lu <sub>2</sub> O <sub>3</sub> | --                                            |                     |                      | 0.47                             | 0.13              | 0.21                | 0.37                 | 0.12                                | 0.38               | 0.1                              | 0.45    |
| References                     | (630)                                         |                     |                      |                                  | (631)             |                     |                      |                                     |                    | (632)                            | (618)   |

<sup>a</sup> Percentages are based on the averages of the ranges provided in the reference

<sup>b</sup> The percentages for the oxides of Tb, Dy, Ho, Er, Tm, Yb, and Lu are reported as totaling 0.05%. This sum is disaggregated in this analysis among the individual rare earth oxides based on information noted in (624).

<sup>c</sup> Percentages refer to rare earth ore concentrate

<sup>d</sup> The percentages for CeO<sub>2</sub> and Eu<sub>2</sub>O<sub>3</sub>, noted as <1.09 and <0.37, respectively, are assumed to equal 1.09 and 0.37, respectively, in the production allocation calculation.

<sup>e</sup> Although monazite and xenotime deposits exist in Guangdong province, this analysis assumes that all of Guangdong's production pertains to ion-adsorption deposits

<sup>f</sup> Percentages are approximated based on the average distribution of five samples in ion-adsorption ores (1130S3-7) noted in the reference. Percentages have been converted from rare-earth element content to their oxide equivalent for consistency of display.

## **Rare earth demand and net imports**

Estimates of U.S. demand for the rare earths by individual element and by application are derived using information and data from Roskill (565). Roskill reports total rare earth consumption (not separated for individual elements) by application and region, including the United States. Separately, Roskill also reports global consumption (not separated by country or region) by individual rare earth element and application. To obtain consumption by individual rare earth element by application for the United States the combination of these two separate data sets was required. To accomplish this task, it was assumed that the rare earth element consumption contribution for each application, and for each year, on a global basis was applicable to the consumption of the United States. For example, Roskill notes a specific contribution of lanthanum, cerium, and neodymium in rare earth catalyst consumption on a global basis for the years in questions. This ratio of lanthanum, cerium, and neodymium in global rare earth catalysts was applied to the separate dataset which provides the U.S. share of rare earth catalysts consumption to obtain an estimate of U.S. consumption of lanthanum, cerium, and neodymium that is specific for catalysts. This estimation technique was used for the following applications: catalysts, polishing powders, nickel-metal hydride (NiMH) batteries, metallurgy, glass additives, ceramics, phosphors and pigments, and other miscellaneous applications.

In addition to the small amount of rare earth consumption for the U.S. production of magnet alloys reported by Roskill (565), which are assumed to be solely for samarium contained in samarium cobalt (SmCo) magnets, net imports of permanent magnets and of articles intended to become permanent magnets after magnetization are included using the following trade codes: 8505110070 (NdFeB) and 8505110050 (SmCo). These net imports were quantified on a momentary basis and then distributed among neodymium, praseodymium, dysprosium, samarium based on their assumed mass distribution (83% neodymium, 14% praseodymium, 3% dysprosium for NdFeB and 28% Sm, 72% Co for SmCo) and the prices of these commodities for the years in question. Note these trade codes only became available beginning in mid-2014 and are thus only included in this analysis for years 2015 and 2016.

The TE indicator for the rare earths was, in turn, calculated by subtracting domestic production as described in the previous section of this document from total demand for each rare earth element. This method thus assumes negligible domestic stock changes.

# Results by year

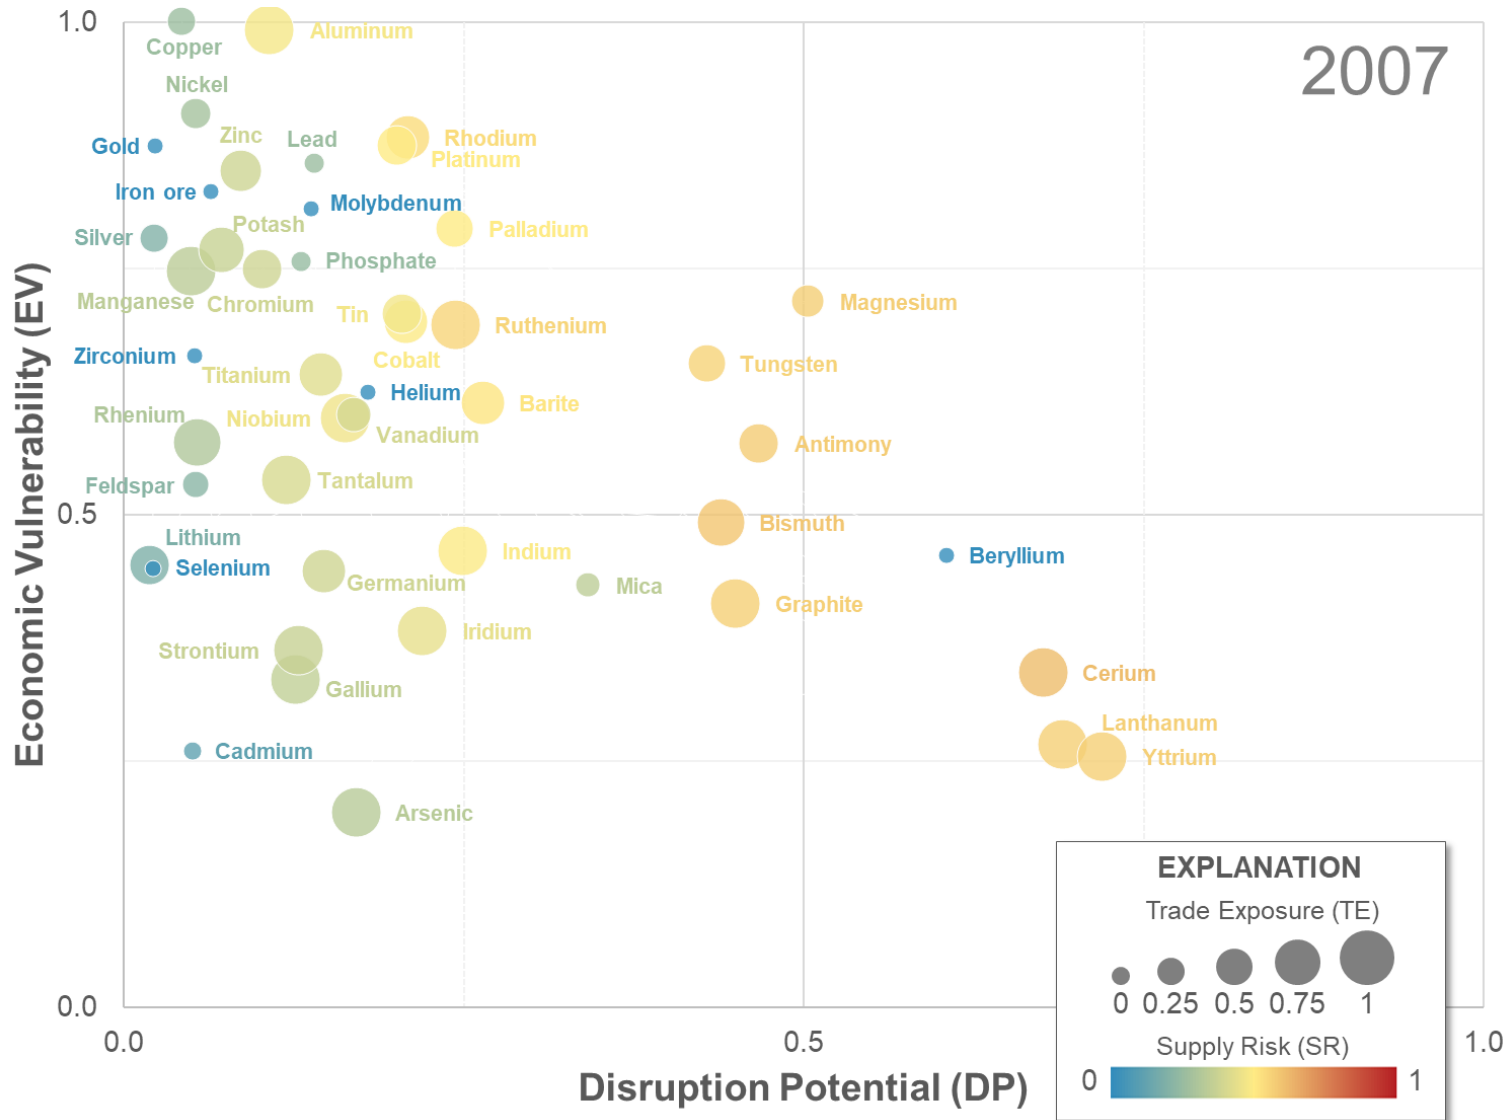

2008

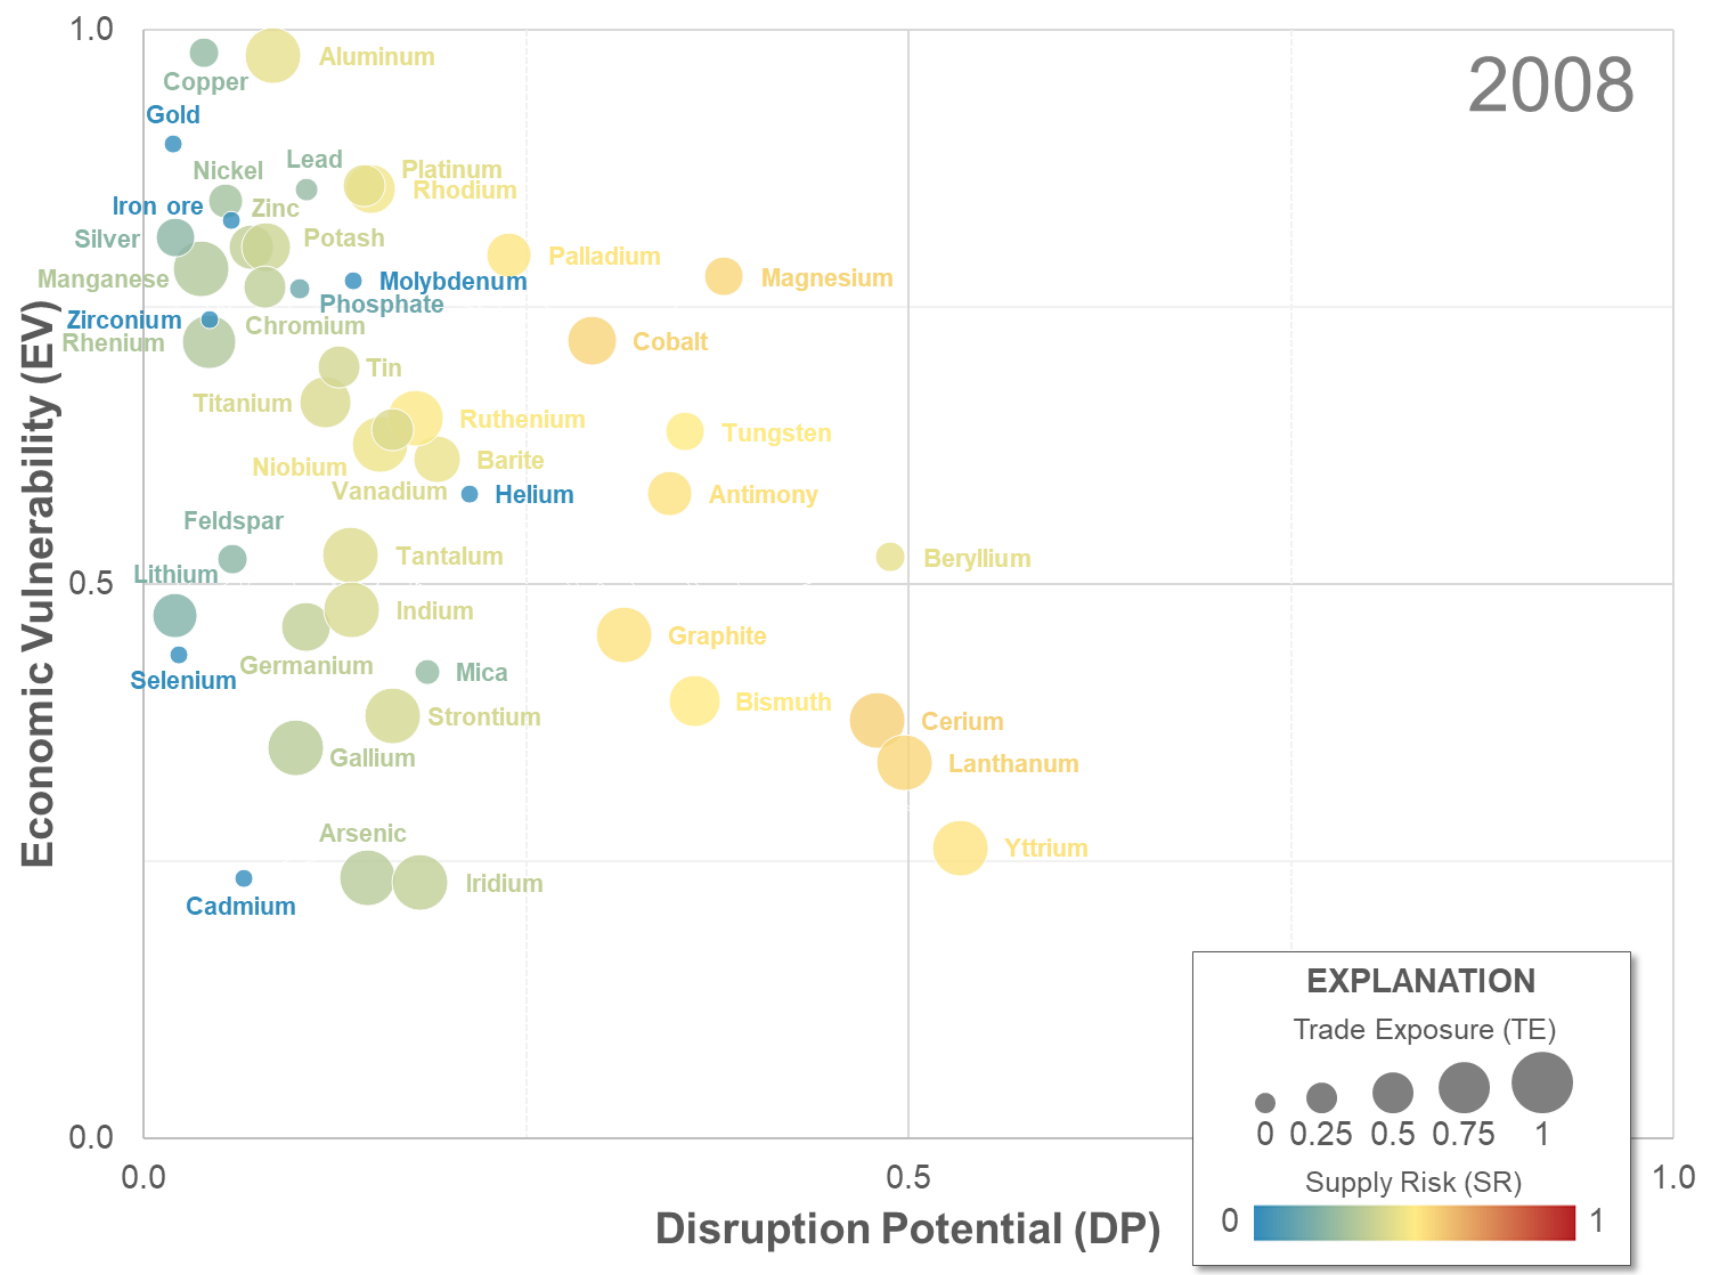



2009

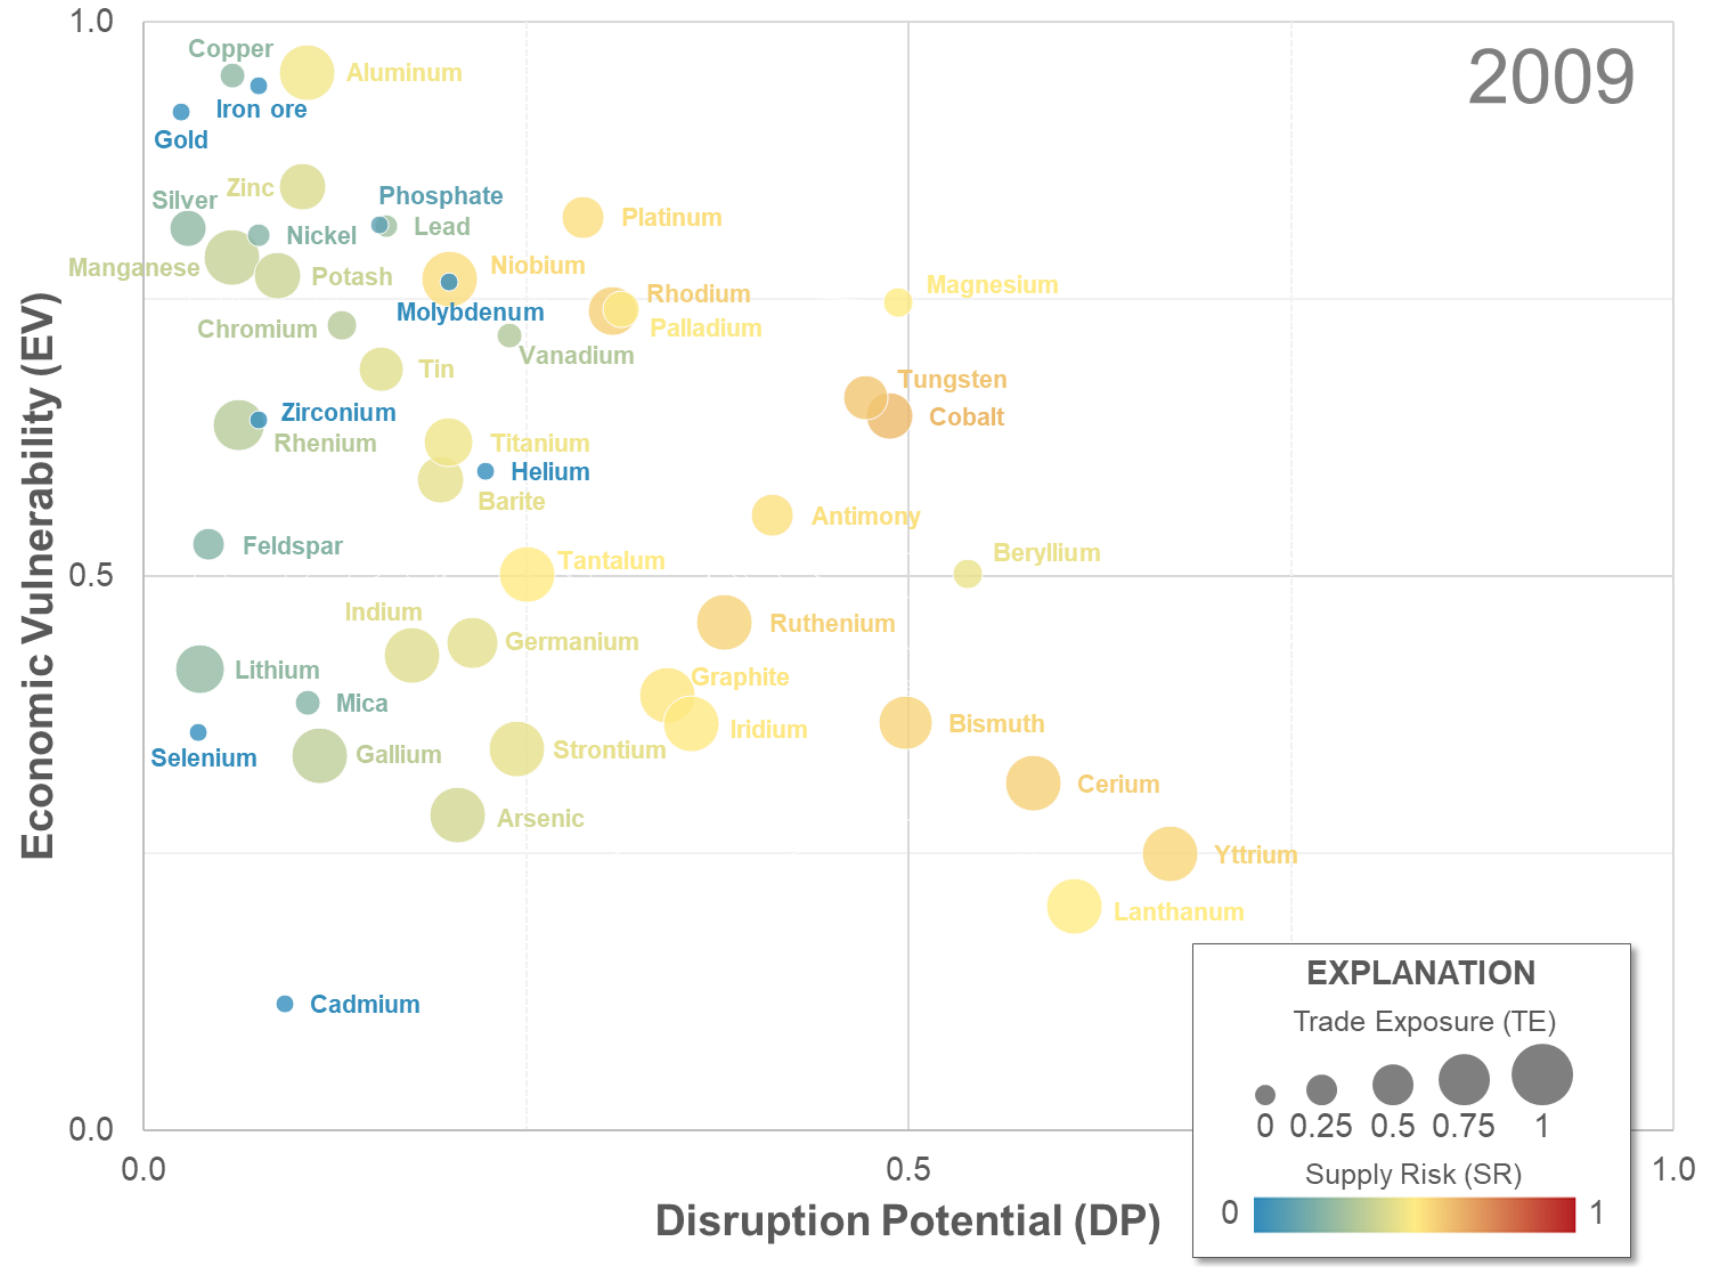

2010

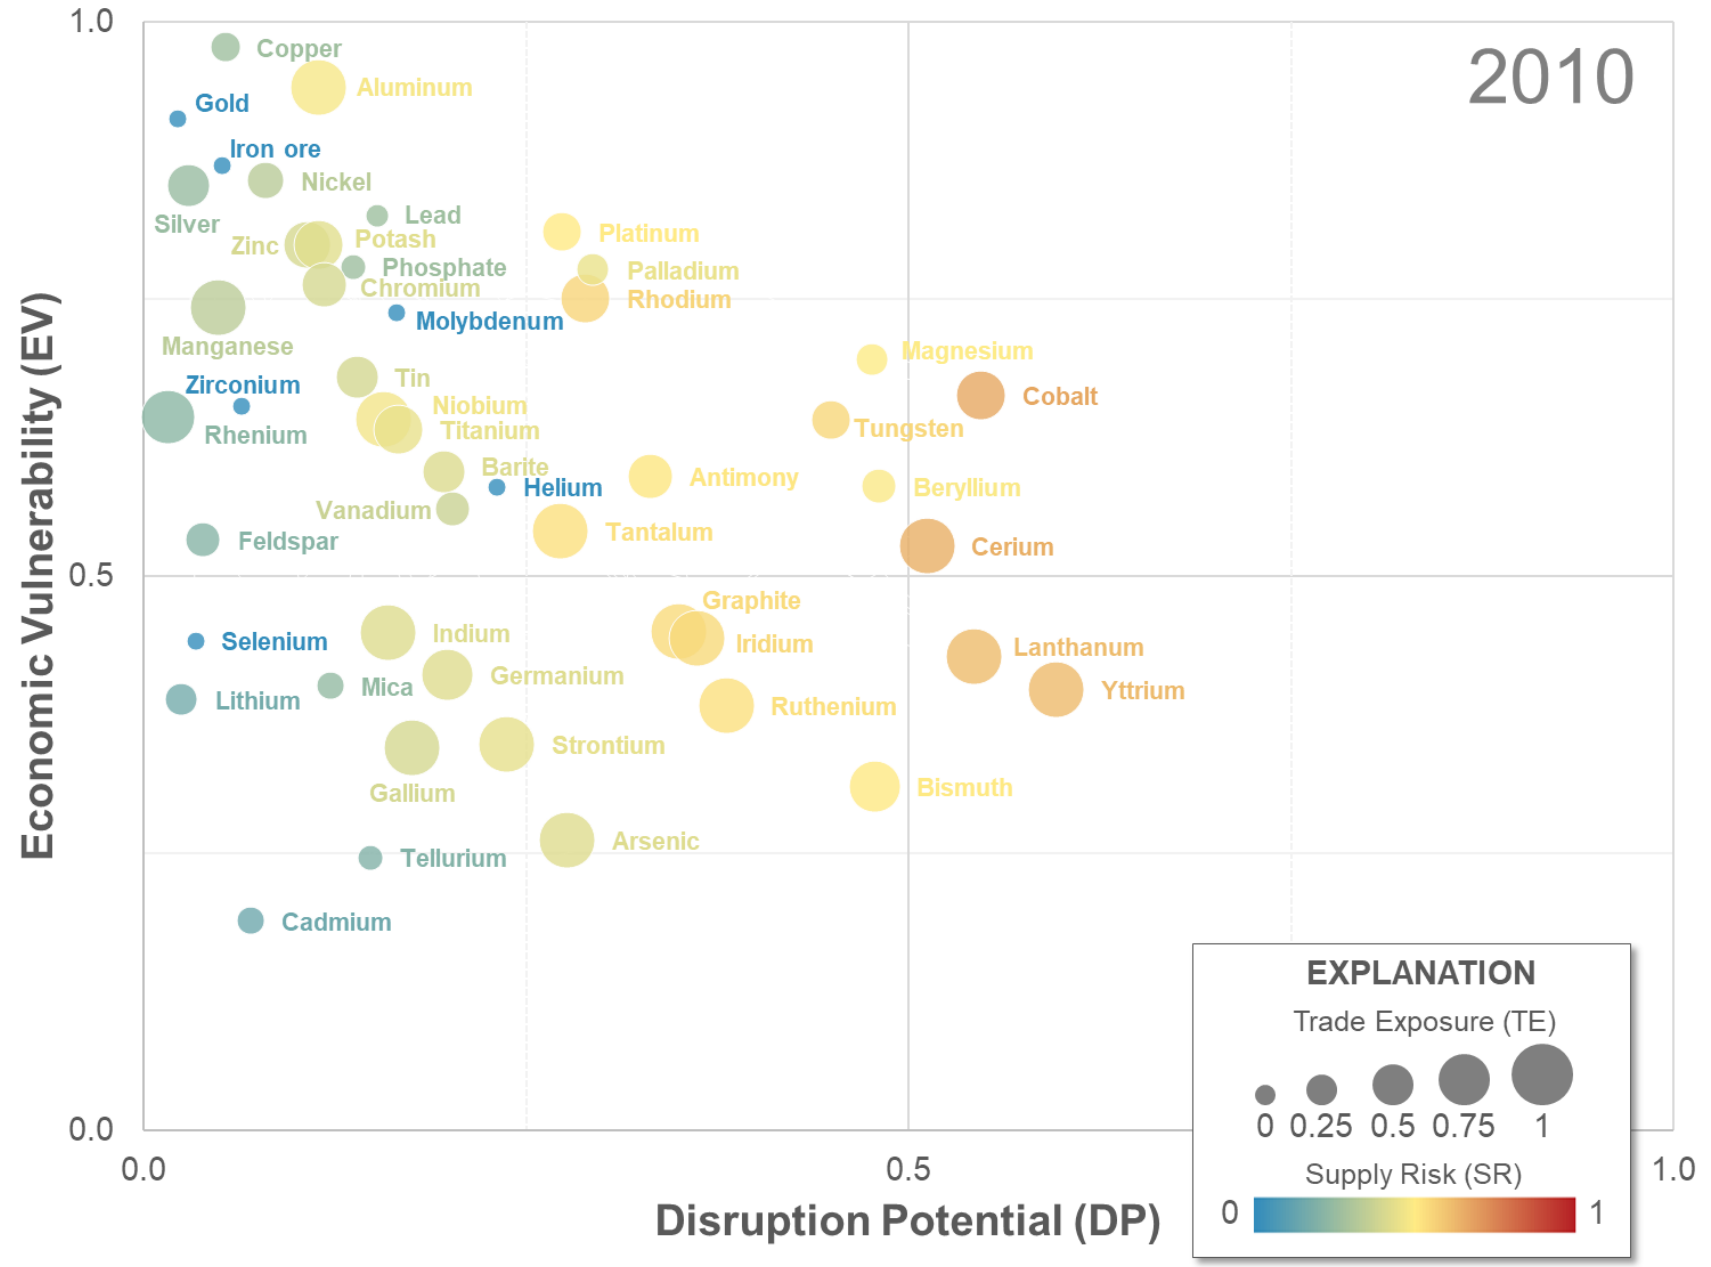

2011

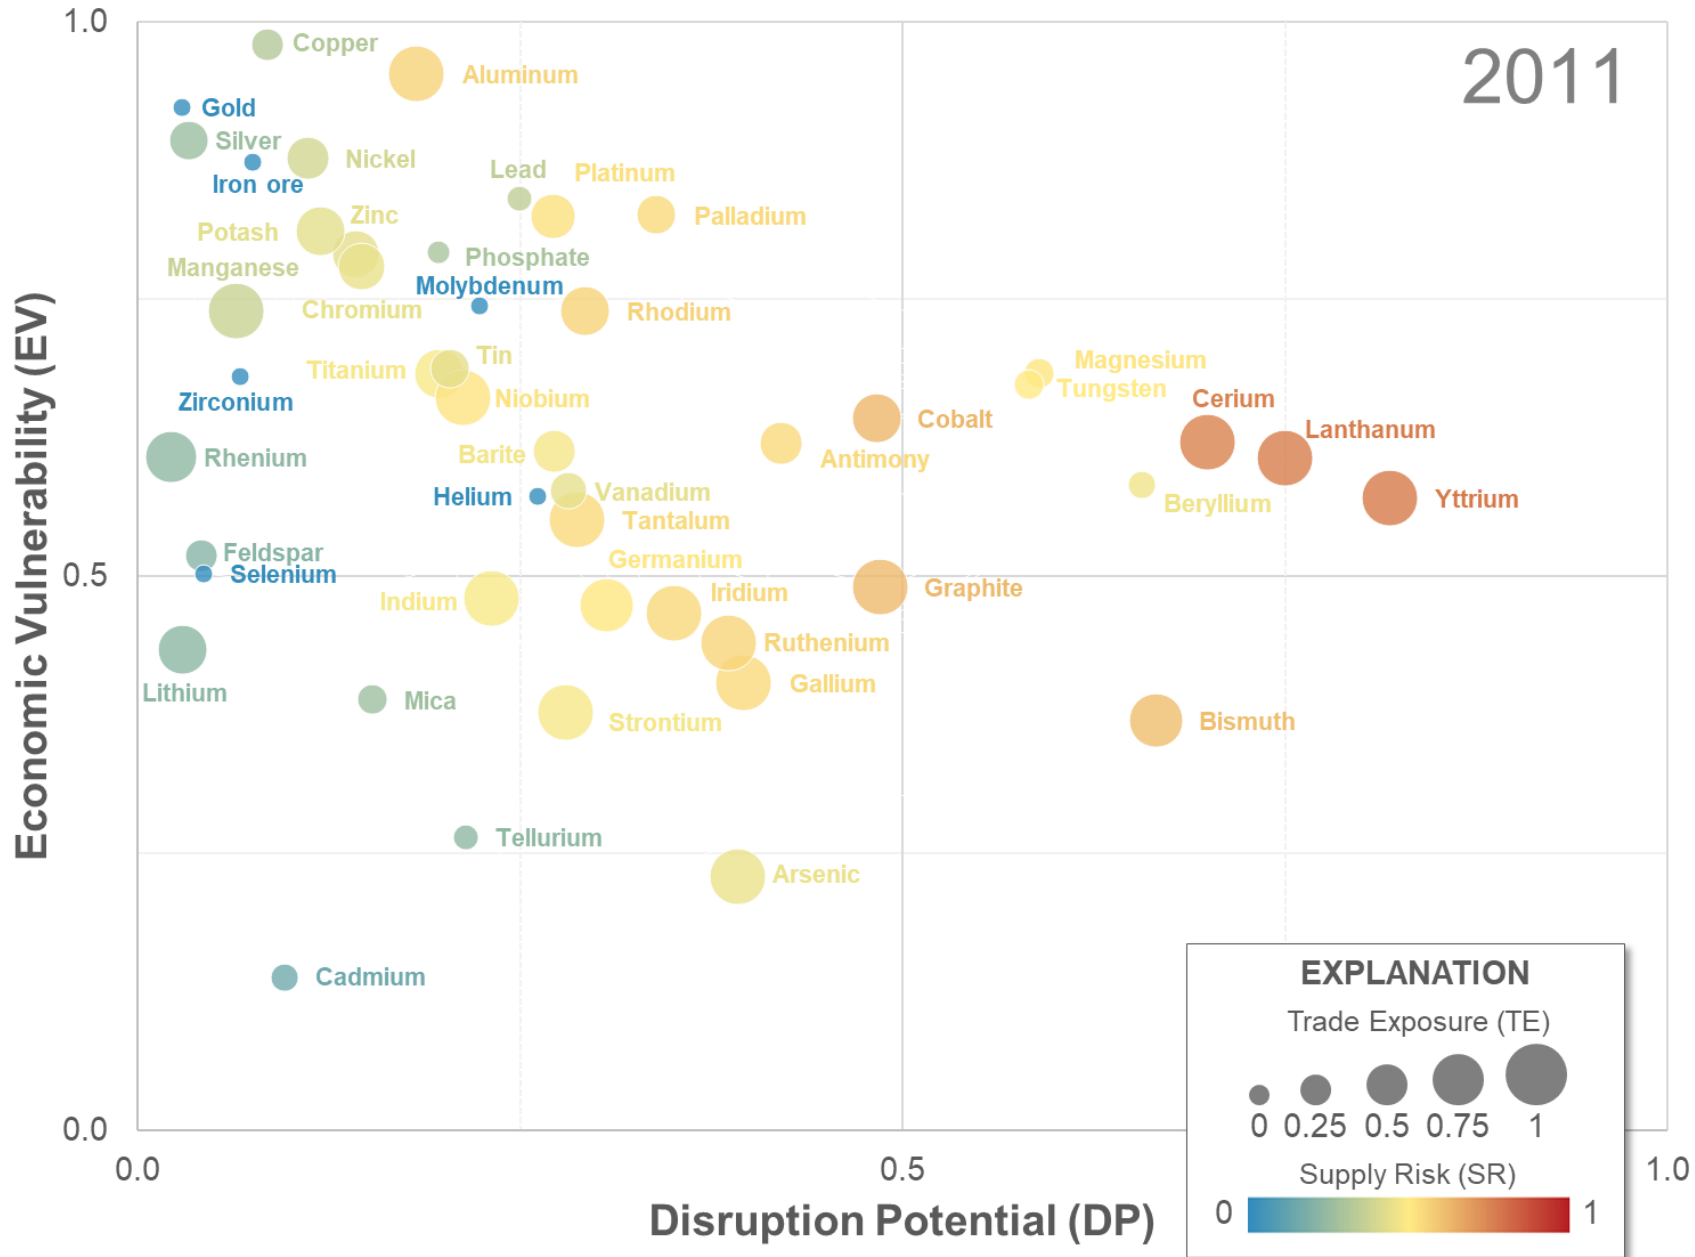

2012

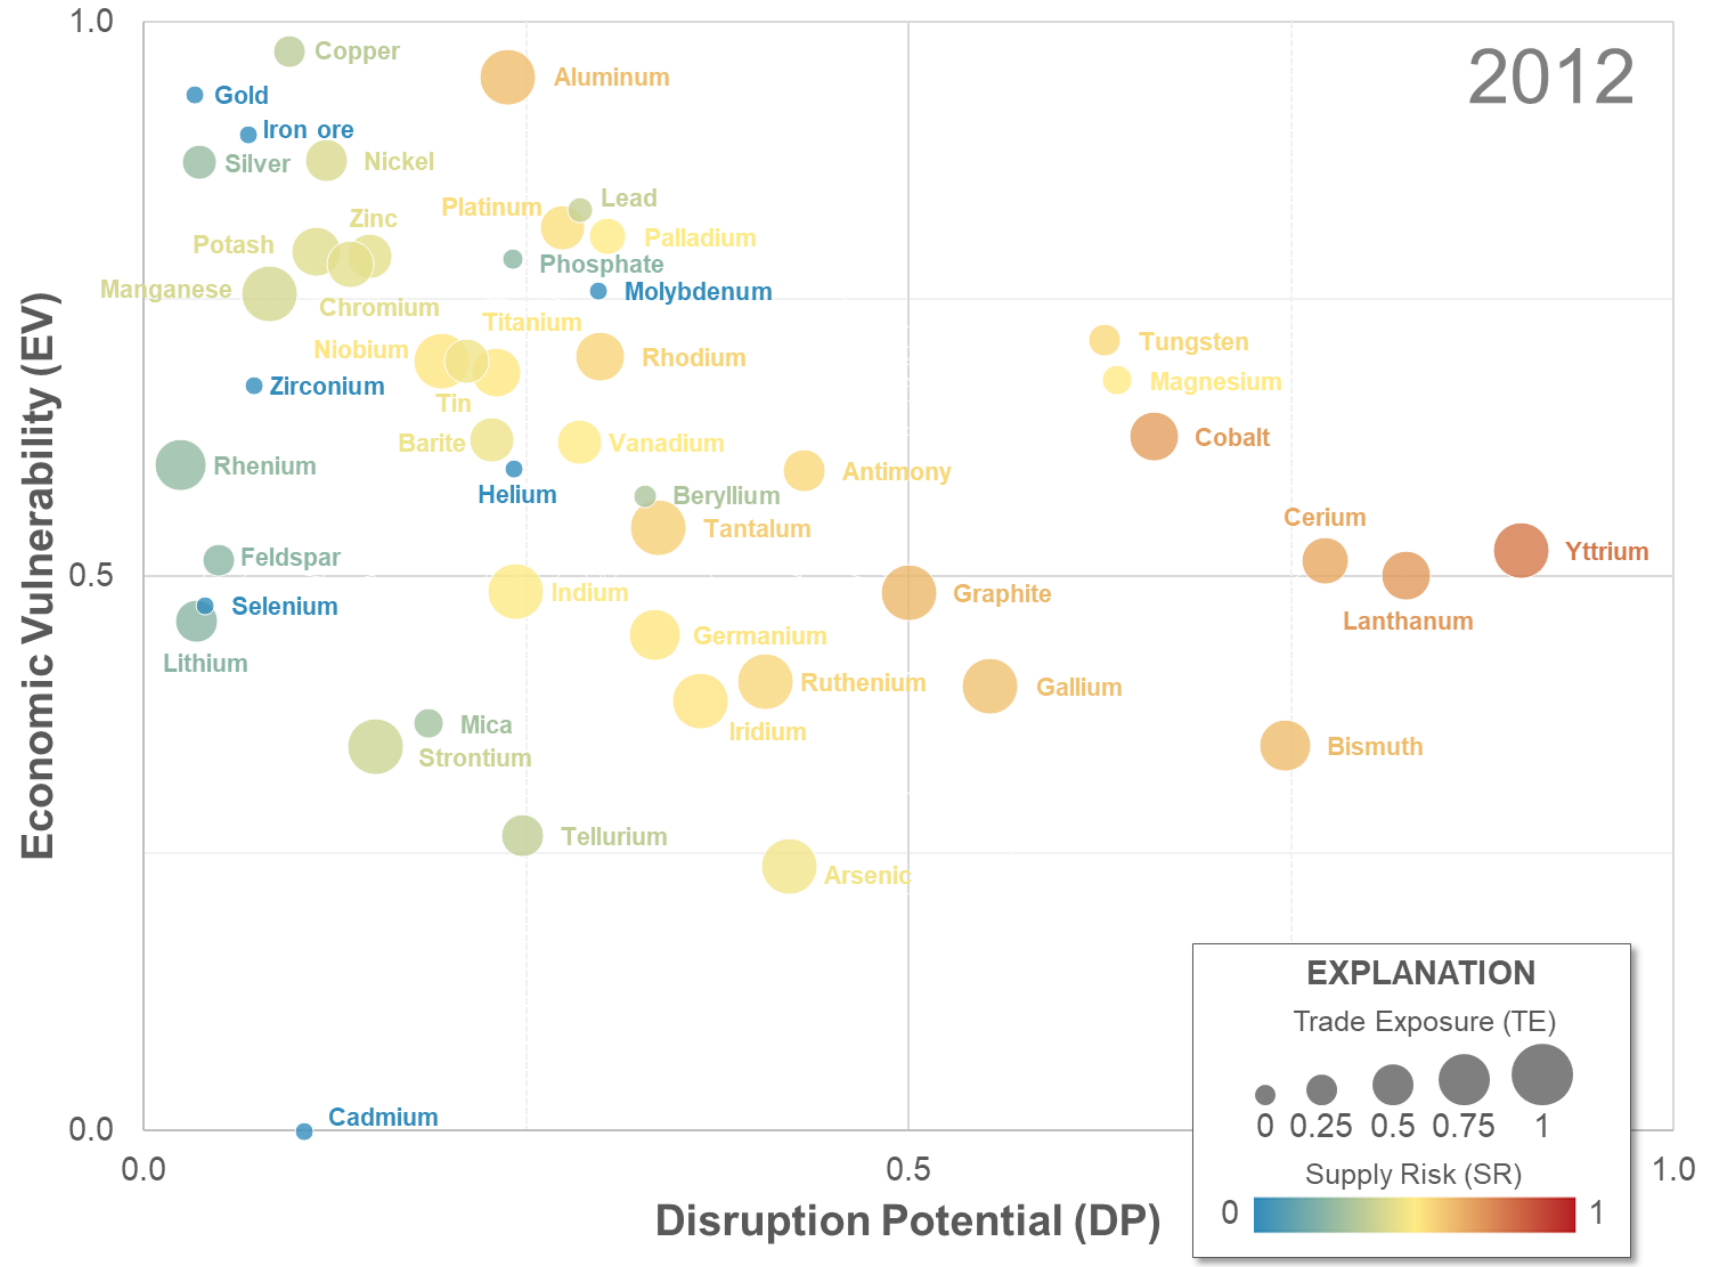

2013

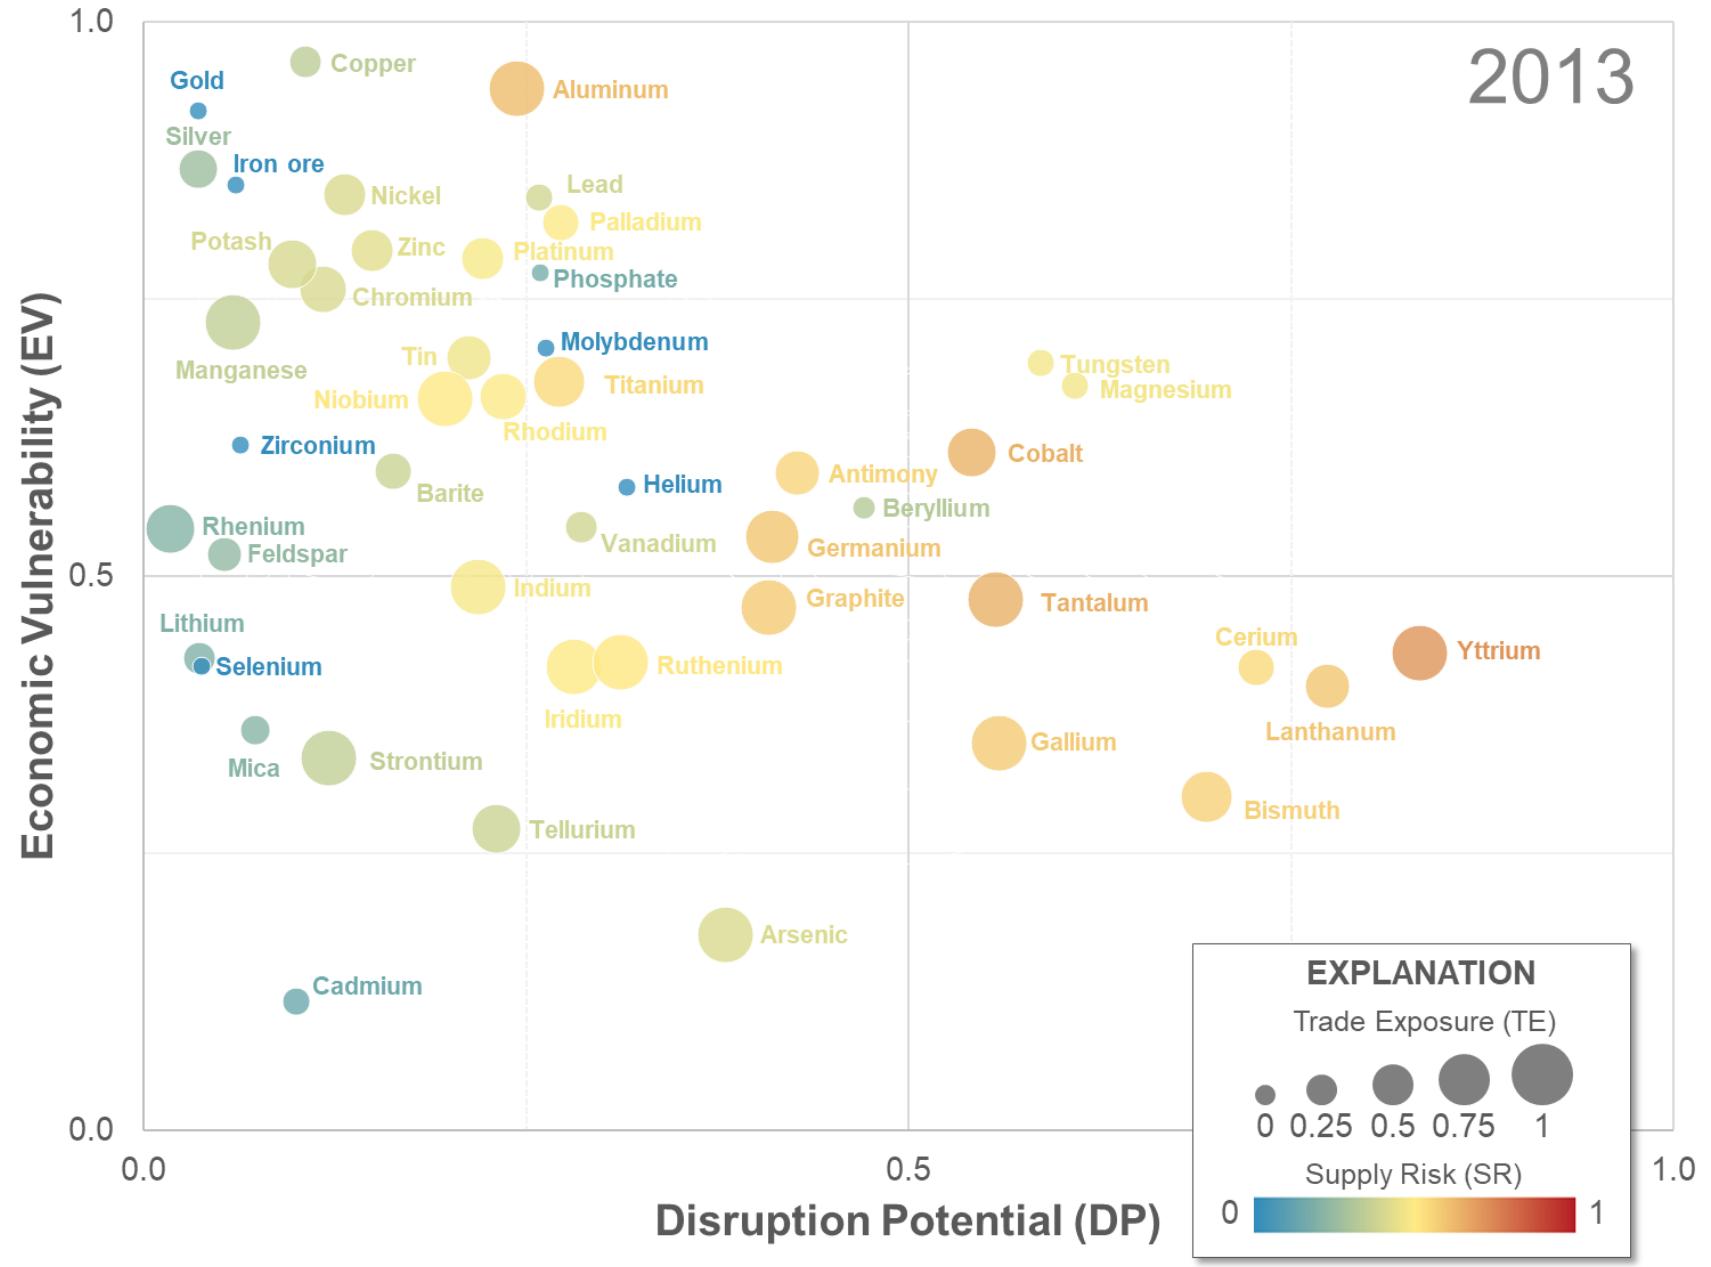

2014

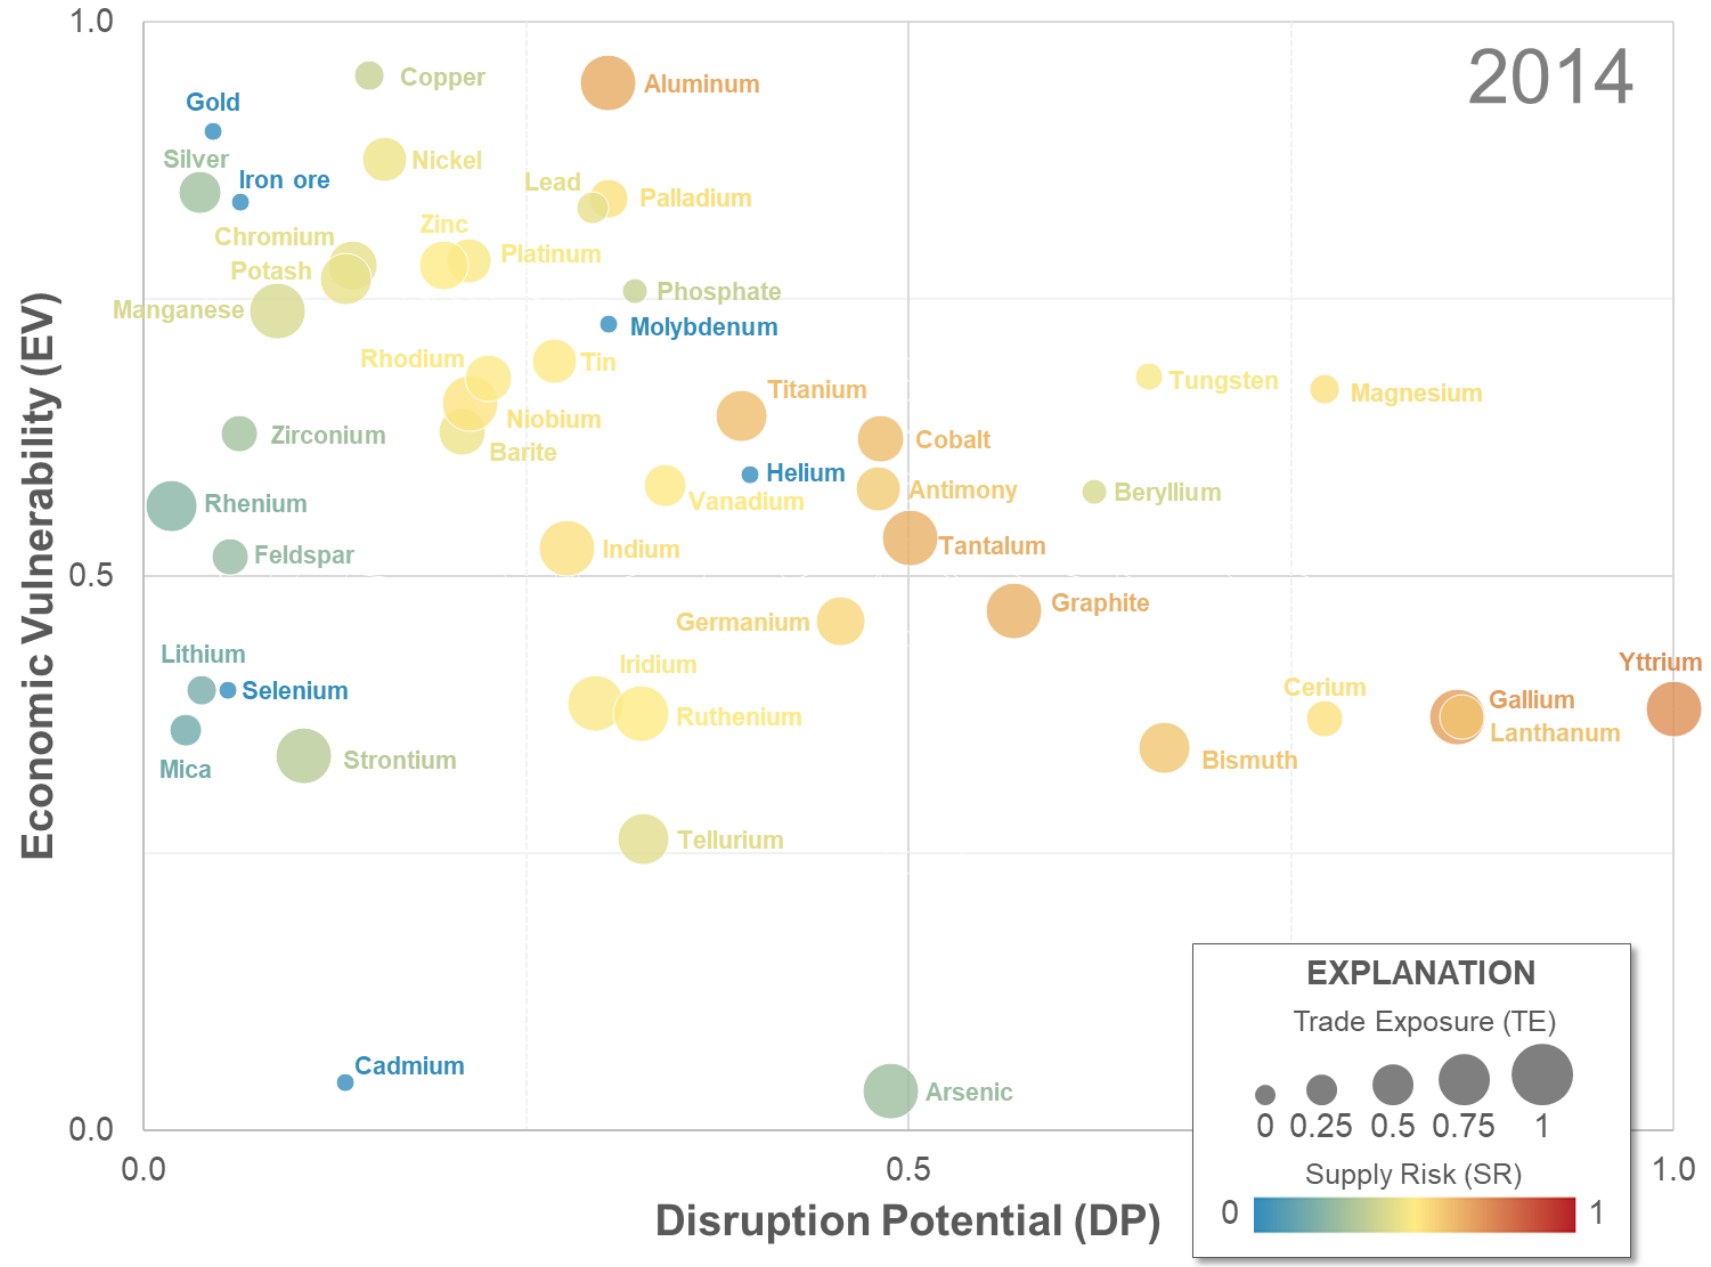

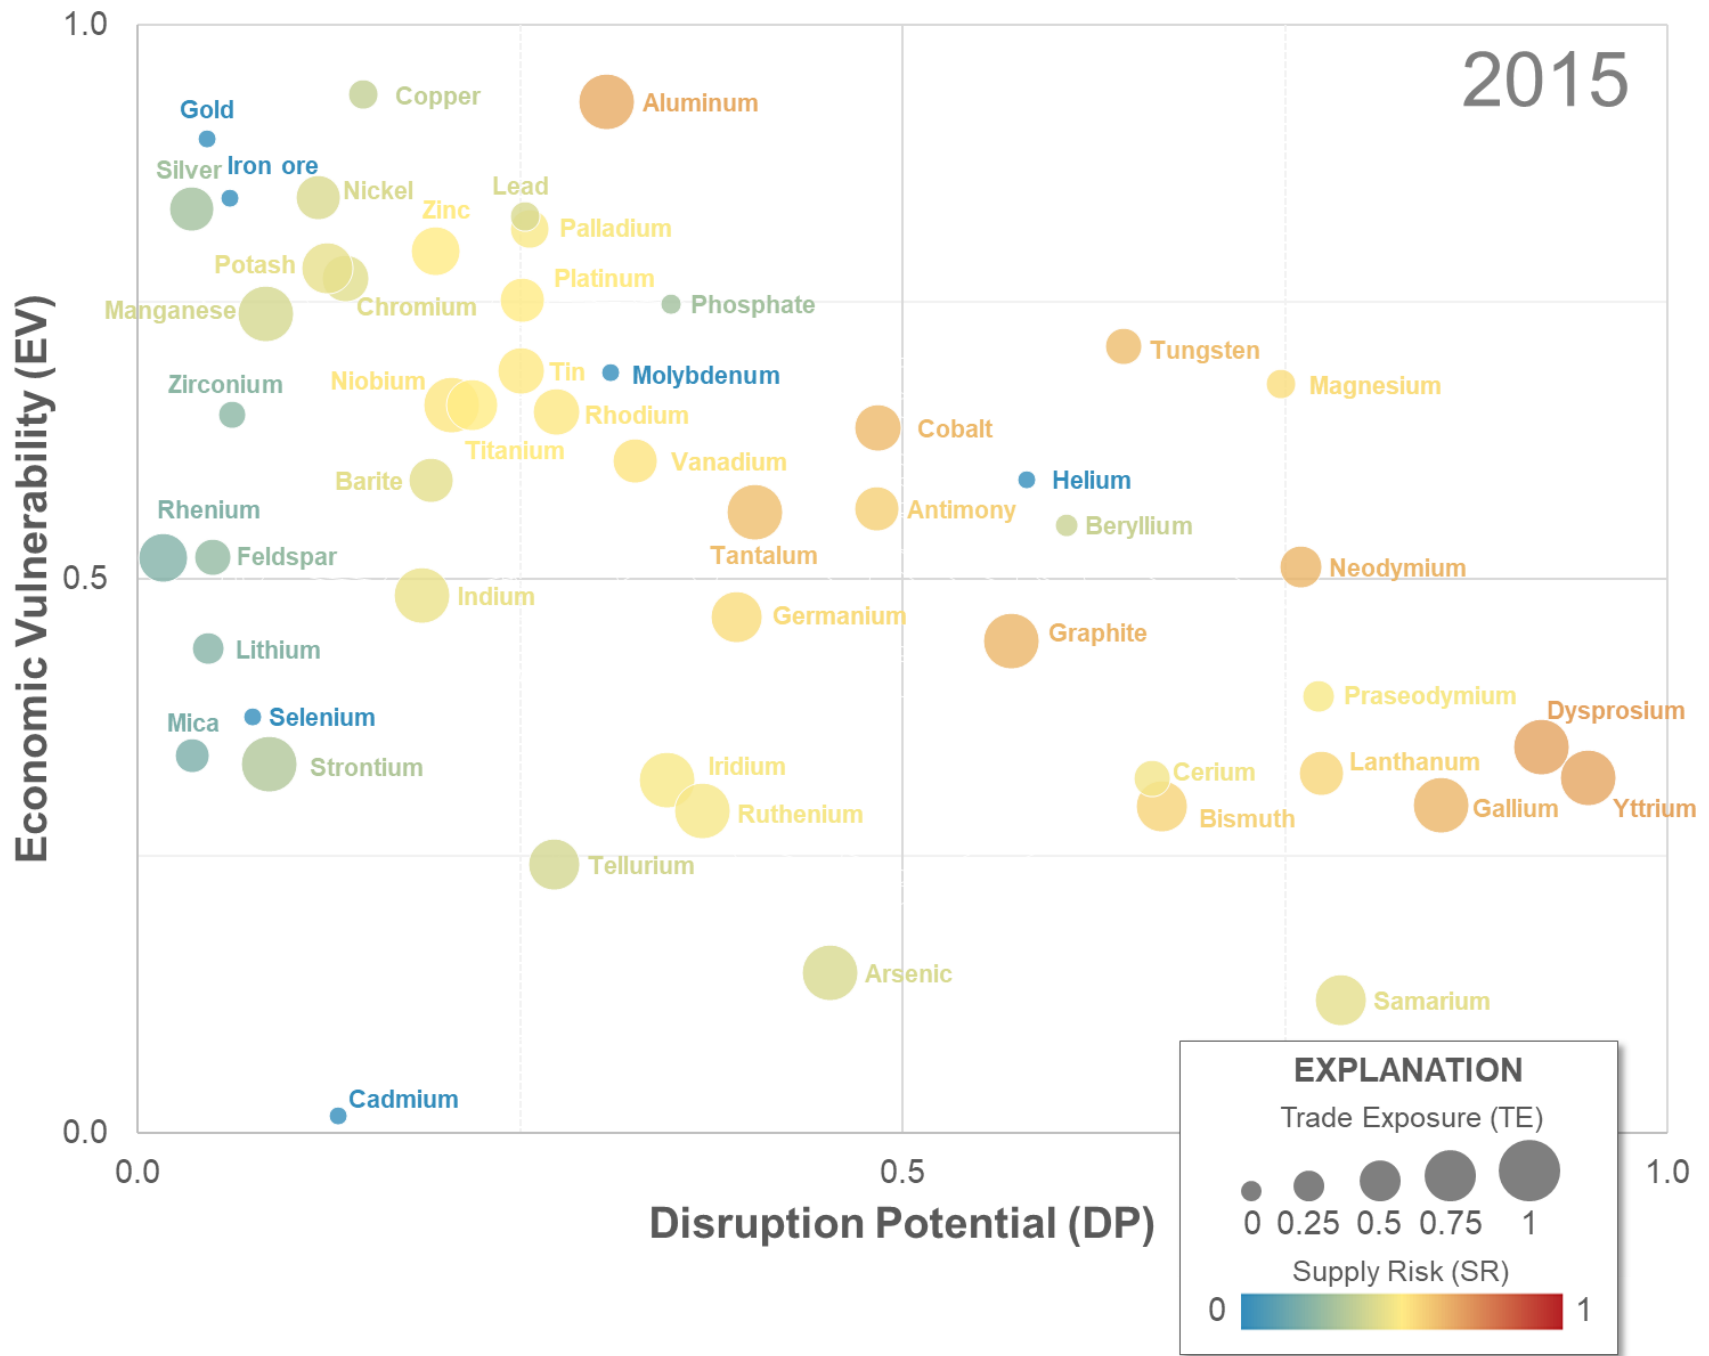

Fig. S2. SR, DP, EV, and TE scores for years 2007–2015.

## Hierarchical cluster analyses

A hierarchical cluster analysis was performed for year 2016 on all commodities based on the Euclidean distance across the three individual indicators (Supply Distribution, Economic Vulnerability, and Trade Exposure) and Ward's minimum variance method (633, 634). The "within groups sum of squares" was used as guidance to determine that there were 7 clusters. The results are displayed in the following figures.

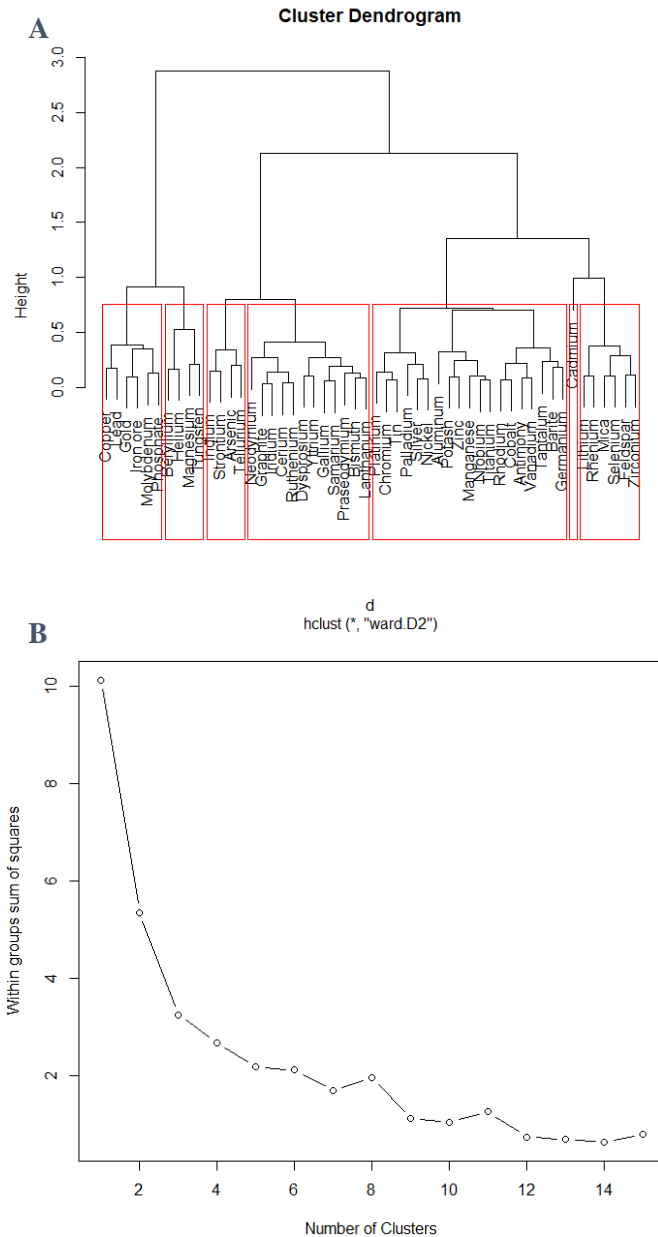

**Fig. S3.** Hierarchical cluster analysis dendrogram (A) and within groups sum of squares (B) for year 2016 based on the Euclidean distance across the three indicators.



A second hierarchical cluster analysis was performed on the average overall Supply Risk for all years (2007-2016) using the same method. The results for that analysis are presented in the figures below.

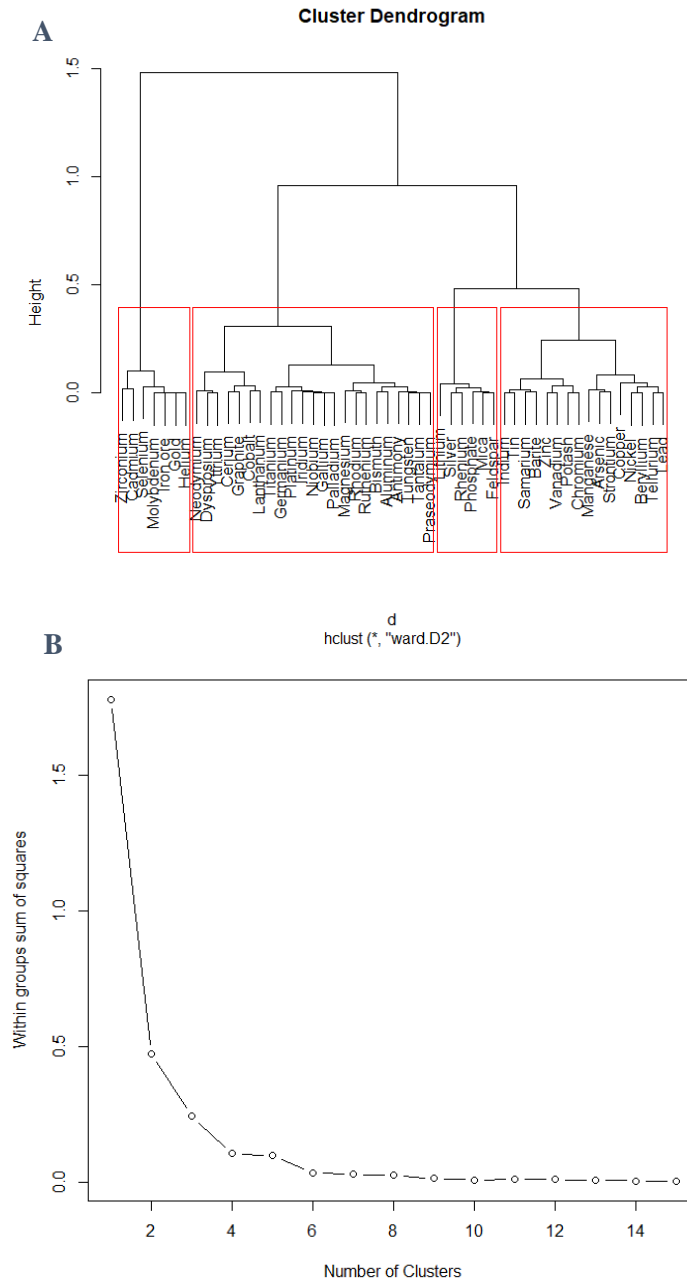

**Fig. S4.** Hierarchical cluster analysis dendrogram (A) and within groups sum of squares (B) based on the Euclidean distance of the 2007-2016 average SR scores.
